# Supplementary material for: A network view of human immune system and virus-human interaction
Source: Front Immunol. 2022 Oct 26;13:997851. doi: 10.3389/fimmu.2022.997851 (PMC9643829; doi:10.3389/fimmu.2022.997851)
Supplement: Supplementary file 6 [file Table_5.xlsx]

## Sheet: Legend
Virus abbreviation	29 selected viruses and their abbreviations
	Virus	Virus name
	Abbre	Abbreviation for virus name
VTG	Virally-targeted genes
	Gene	Gene symbol
	Virus	Virus name
	Abbre	Abbreviation for virus name
	Baltimore	Baltimore category
	Family	Viral family
VTM	Virally-targeted modules
	Virus	Virus name
	Abbre	Abbreviation for virus name
	Baltimore	Baltimore category
	Family	Viral family
	Module	Module ID
	P_value	Statistical significance hypergeometric test
	ADJ_pvalue	Benjamini-Hochberg adjusted p-value
CoV-targets_in_domain	Coronaviral targets and the functional domains they reside in
	Category	Categories based on the gene overlap across three coronaviruses and other viruses
	Gene	Gene symbol
	Domain_Id	Functional domains in HUMPPI-2022 identified by SAFE
	Domain_num	The number of domains each gene resides in
CoV-targets_in_module	Modules that each of the three coronaviruses specific targets included in
	Virus	Virus name
	Module	Module ID
	Number	Number of virally specific targets in the module
	P_value	Statistical significance of enrichment of virally specific targets by hypergeometric test

## Sheet: Virus abbreviation
Virus	Abbre
Dengue virus 2	DENV-2
Ebola virus	EBOV
Epstein-Barr virus	EBV
Hepatitis C virus	HCV
Human adenovirus C	HAdV
Human cytomegalovirus	HCMV
Human herpesvirus 1	HHV-1
Human immunodeficiency virus 1	HIV-1
Human papillomavirus 11	HPV-11
Human papillomavirus 16	HPV-16
Human papillomavirus 18	HPV-18
Human papillomavirus 31	HPV-31
Human papillomavirus 33	HPV-33
Human papillomavirus 5	HPV-5
Human papillomavirus 6b	HPV-6b
Human papillomavirus 8	HPV-8
Human papillomavirus 9	HPV-9
Human respiratory syncytial virus	HRSV
Influenza A virus (H1N1)	H1N1
Influenza A virus (H3N2)	H3N2
Influenza A virus (H5N1)	H5N1
Kaposi's sarcoma-associated herpesvirus	KSHV
Lymphocytic choriomeningitis virus	LCMV
Measles virus	MV
MERS	MERS-CoV
SARS-CoV-1	SARS-CoV-1
SARS-CoV-2	SARS-CoV-2
Vaccinia virus	VACV
Zika virus	ZIKV

## Sheet: VTG
Gene	Virus	Abbre	Baltimore	Family
GLYR1	Dengue virus 2	DENV-2	(+)ssRNA	Flaviviridae
CEP63	Dengue virus 2	DENV-2	(+)ssRNA	Flaviviridae
SART3	Dengue virus 2	DENV-2	(+)ssRNA	Flaviviridae
GOLGA6L10	Dengue virus 2	DENV-2	(+)ssRNA	Flaviviridae
ALG10	Dengue virus 2	DENV-2	(+)ssRNA	Flaviviridae
ERLIN2	Dengue virus 2	DENV-2	(+)ssRNA	Flaviviridae
AQR	Dengue virus 2	DENV-2	(+)ssRNA	Flaviviridae
EARS2	Dengue virus 2	DENV-2	(+)ssRNA	Flaviviridae
SAMM50	Dengue virus 2	DENV-2	(+)ssRNA	Flaviviridae
GOLT1B	Dengue virus 2	DENV-2	(+)ssRNA	Flaviviridae
RRP1B	Dengue virus 2	DENV-2	(+)ssRNA	Flaviviridae
BUB3	Dengue virus 2	DENV-2	(+)ssRNA	Flaviviridae
CEP250	Dengue virus 2	DENV-2	(+)ssRNA	Flaviviridae
GDAP1	Dengue virus 2	DENV-2	(+)ssRNA	Flaviviridae
RPL12	Dengue virus 2	DENV-2	(+)ssRNA	Flaviviridae
HLA-B	Dengue virus 2	DENV-2	(+)ssRNA	Flaviviridae
PSMC1	Dengue virus 2	DENV-2	(+)ssRNA	Flaviviridae
GCN1	Dengue virus 2	DENV-2	(+)ssRNA	Flaviviridae
FAF2	Dengue virus 2	DENV-2	(+)ssRNA	Flaviviridae
EXTL2	Dengue virus 2	DENV-2	(+)ssRNA	Flaviviridae
ARF1	Dengue virus 2	DENV-2	(+)ssRNA	Flaviviridae
GTF3C5	Dengue virus 2	DENV-2	(+)ssRNA	Flaviviridae
TMEM245	Dengue virus 2	DENV-2	(+)ssRNA	Flaviviridae
YTHDC2	Dengue virus 2	DENV-2	(+)ssRNA	Flaviviridae
KPNA2	Dengue virus 2	DENV-2	(+)ssRNA	Flaviviridae
NF1	Dengue virus 2	DENV-2	(+)ssRNA	Flaviviridae
GBF1	Dengue virus 2	DENV-2	(+)ssRNA	Flaviviridae
SAAL1	Dengue virus 2	DENV-2	(+)ssRNA	Flaviviridae
SSR4	Dengue virus 2	DENV-2	(+)ssRNA	Flaviviridae
AKR7A3	Dengue virus 2	DENV-2	(+)ssRNA	Flaviviridae
ERC1	Dengue virus 2	DENV-2	(+)ssRNA	Flaviviridae
RPS21	Dengue virus 2	DENV-2	(+)ssRNA	Flaviviridae
MRPS26	Dengue virus 2	DENV-2	(+)ssRNA	Flaviviridae
FAR1	Dengue virus 2	DENV-2	(+)ssRNA	Flaviviridae
RRP15	Dengue virus 2	DENV-2	(+)ssRNA	Flaviviridae
AKAP1	Dengue virus 2	DENV-2	(+)ssRNA	Flaviviridae
APOB	Dengue virus 2	DENV-2	(+)ssRNA	Flaviviridae
EMG1	Dengue virus 2	DENV-2	(+)ssRNA	Flaviviridae
TMEM115	Dengue virus 2	DENV-2	(+)ssRNA	Flaviviridae
RSL1D1	Dengue virus 2	DENV-2	(+)ssRNA	Flaviviridae
ESYT2	Dengue virus 2	DENV-2	(+)ssRNA	Flaviviridae
ERGIC1	Dengue virus 2	DENV-2	(+)ssRNA	Flaviviridae
EWSR1	Dengue virus 2	DENV-2	(+)ssRNA	Flaviviridae
BCLAF1	Dengue virus 2	DENV-2	(+)ssRNA	Flaviviridae
SCLT1	Dengue virus 2	DENV-2	(+)ssRNA	Flaviviridae
YIF1B	Dengue virus 2	DENV-2	(+)ssRNA	Flaviviridae
TMPO	Dengue virus 2	DENV-2	(+)ssRNA	Flaviviridae
VTI1B	Dengue virus 2	DENV-2	(+)ssRNA	Flaviviridae
HM13	Dengue virus 2	DENV-2	(+)ssRNA	Flaviviridae
GOLGB1	Dengue virus 2	DENV-2	(+)ssRNA	Flaviviridae
EMILIN1	Dengue virus 2	DENV-2	(+)ssRNA	Flaviviridae
RAI14	Dengue virus 2	DENV-2	(+)ssRNA	Flaviviridae
CIP2A	Dengue virus 2	DENV-2	(+)ssRNA	Flaviviridae
VPS26C	Dengue virus 2	DENV-2	(+)ssRNA	Flaviviridae
VKORC1L1	Dengue virus 2	DENV-2	(+)ssRNA	Flaviviridae
SEC16A	Dengue virus 2	DENV-2	(+)ssRNA	Flaviviridae
ESF1	Dengue virus 2	DENV-2	(+)ssRNA	Flaviviridae
ETFA	Dengue virus 2	DENV-2	(+)ssRNA	Flaviviridae
VAC14	Dengue virus 2	DENV-2	(+)ssRNA	Flaviviridae
RNASET2	Dengue virus 2	DENV-2	(+)ssRNA	Flaviviridae
EXOSC7	Dengue virus 2	DENV-2	(+)ssRNA	Flaviviridae
AIFM1	Dengue virus 2	DENV-2	(+)ssRNA	Flaviviridae
SAE1	Dengue virus 2	DENV-2	(+)ssRNA	Flaviviridae
FAM3C	Dengue virus 2	DENV-2	(+)ssRNA	Flaviviridae
WWC1	Dengue virus 2	DENV-2	(+)ssRNA	Flaviviridae
SLC25A13	Dengue virus 2	DENV-2	(+)ssRNA	Flaviviridae
FANCI	Dengue virus 2	DENV-2	(+)ssRNA	Flaviviridae
TNFRSF10B	Dengue virus 2	DENV-2	(+)ssRNA	Flaviviridae
DYNC1H1	Dengue virus 2	DENV-2	(+)ssRNA	Flaviviridae
COPG2	Dengue virus 2	DENV-2	(+)ssRNA	Flaviviridae
HACD3	Dengue virus 2	DENV-2	(+)ssRNA	Flaviviridae
AKAP9	Dengue virus 2	DENV-2	(+)ssRNA	Flaviviridae
PSME3	Dengue virus 2	DENV-2	(+)ssRNA	Flaviviridae
RPP14	Dengue virus 2	DENV-2	(+)ssRNA	Flaviviridae
GOLGA8O	Dengue virus 2	DENV-2	(+)ssRNA	Flaviviridae
XPO7	Dengue virus 2	DENV-2	(+)ssRNA	Flaviviridae
GCDH	Dengue virus 2	DENV-2	(+)ssRNA	Flaviviridae
MRPL12	Dengue virus 2	DENV-2	(+)ssRNA	Flaviviridae
HADHA	Dengue virus 2	DENV-2	(+)ssRNA	Flaviviridae
TUBAL3	Dengue virus 2	DENV-2	(+)ssRNA	Flaviviridae
RRP1	Dengue virus 2	DENV-2	(+)ssRNA	Flaviviridae
SH3GLB1	Dengue virus 2	DENV-2	(+)ssRNA	Flaviviridae
SEL1L	Dengue virus 2	DENV-2	(+)ssRNA	Flaviviridae
RASEF	Dengue virus 2	DENV-2	(+)ssRNA	Flaviviridae
RBM27	Dengue virus 2	DENV-2	(+)ssRNA	Flaviviridae
CCDC66	Dengue virus 2	DENV-2	(+)ssRNA	Flaviviridae
ALDH3A2	Dengue virus 2	DENV-2	(+)ssRNA	Flaviviridae
MRPS27	Dengue virus 2	DENV-2	(+)ssRNA	Flaviviridae
FAM210A	Dengue virus 2	DENV-2	(+)ssRNA	Flaviviridae
LAMB1	Dengue virus 2	DENV-2	(+)ssRNA	Flaviviridae
RPL24	Dengue virus 2	DENV-2	(+)ssRNA	Flaviviridae
CCDC167	Dengue virus 2	DENV-2	(+)ssRNA	Flaviviridae
FLNA	Dengue virus 2	DENV-2	(+)ssRNA	Flaviviridae
XRN2	Dengue virus 2	DENV-2	(+)ssRNA	Flaviviridae
LPCAT1	Dengue virus 2	DENV-2	(+)ssRNA	Flaviviridae
LEO1	Dengue virus 2	DENV-2	(+)ssRNA	Flaviviridae
G6PC3	Dengue virus 2	DENV-2	(+)ssRNA	Flaviviridae
NUBP2	Dengue virus 2	DENV-2	(+)ssRNA	Flaviviridae
BAZ1A	Dengue virus 2	DENV-2	(+)ssRNA	Flaviviridae
ESYT1	Dengue virus 2	DENV-2	(+)ssRNA	Flaviviridae
GPR89B	Dengue virus 2	DENV-2	(+)ssRNA	Flaviviridae
FIS1	Dengue virus 2	DENV-2	(+)ssRNA	Flaviviridae
BCS1L	Dengue virus 2	DENV-2	(+)ssRNA	Flaviviridae
IMMT	Dengue virus 2	DENV-2	(+)ssRNA	Flaviviridae
EI24	Dengue virus 2	DENV-2	(+)ssRNA	Flaviviridae
CCDC124	Dengue virus 2	DENV-2	(+)ssRNA	Flaviviridae
RARS2	Dengue virus 2	DENV-2	(+)ssRNA	Flaviviridae
CTNND1	Dengue virus 2	DENV-2	(+)ssRNA	Flaviviridae
USE1	Dengue virus 2	DENV-2	(+)ssRNA	Flaviviridae
GGA1	Dengue virus 2	DENV-2	(+)ssRNA	Flaviviridae
SRBD1	Dengue virus 2	DENV-2	(+)ssRNA	Flaviviridae
GPAT4	Dengue virus 2	DENV-2	(+)ssRNA	Flaviviridae
XRCC6	Dengue virus 2	DENV-2	(+)ssRNA	Flaviviridae
GALNT2	Dengue virus 2	DENV-2	(+)ssRNA	Flaviviridae
DAP3	Dengue virus 2	DENV-2	(+)ssRNA	Flaviviridae
EXOSC3	Dengue virus 2	DENV-2	(+)ssRNA	Flaviviridae
FKBP8	Dengue virus 2	DENV-2	(+)ssRNA	Flaviviridae
ANKS1B	Dengue virus 2	DENV-2	(+)ssRNA	Flaviviridae
AGPAT5	Dengue virus 2	DENV-2	(+)ssRNA	Flaviviridae
AGGF1	Dengue virus 2	DENV-2	(+)ssRNA	Flaviviridae
SCAMP3	Dengue virus 2	DENV-2	(+)ssRNA	Flaviviridae
WRNIP1	Dengue virus 2	DENV-2	(+)ssRNA	Flaviviridae
ANKRD12	Dengue virus 2	DENV-2	(+)ssRNA	Flaviviridae
HAUS6	Dengue virus 2	DENV-2	(+)ssRNA	Flaviviridae
NCAPG2	Dengue virus 2	DENV-2	(+)ssRNA	Flaviviridae
ATP2A1	Dengue virus 2	DENV-2	(+)ssRNA	Flaviviridae
SDCCAG8	Dengue virus 2	DENV-2	(+)ssRNA	Flaviviridae
BRAT1	Dengue virus 2	DENV-2	(+)ssRNA	Flaviviridae
RCC2	Dengue virus 2	DENV-2	(+)ssRNA	Flaviviridae
SFXN1	Dengue virus 2	DENV-2	(+)ssRNA	Flaviviridae
BNIP1	Dengue virus 2	DENV-2	(+)ssRNA	Flaviviridae
TOMM40	Dengue virus 2	DENV-2	(+)ssRNA	Flaviviridae
TOP1	Dengue virus 2	DENV-2	(+)ssRNA	Flaviviridae
TUBA1B	Dengue virus 2	DENV-2	(+)ssRNA	Flaviviridae
SLC25A11	Dengue virus 2	DENV-2	(+)ssRNA	Flaviviridae
FUNDC2	Dengue virus 2	DENV-2	(+)ssRNA	Flaviviridae
SLC3A2	Dengue virus 2	DENV-2	(+)ssRNA	Flaviviridae
ATXN2	Dengue virus 2	DENV-2	(+)ssRNA	Flaviviridae
CHCHD6	Dengue virus 2	DENV-2	(+)ssRNA	Flaviviridae
NPM1	Dengue virus 2	DENV-2	(+)ssRNA	Flaviviridae
ERLEC1	Dengue virus 2	DENV-2	(+)ssRNA	Flaviviridae
GADD45GIP1	Dengue virus 2	DENV-2	(+)ssRNA	Flaviviridae
VAPA	Dengue virus 2	DENV-2	(+)ssRNA	Flaviviridae
DAD1	Dengue virus 2	DENV-2	(+)ssRNA	Flaviviridae
WFS1	Dengue virus 2	DENV-2	(+)ssRNA	Flaviviridae
BRIX1	Dengue virus 2	DENV-2	(+)ssRNA	Flaviviridae
FAM184A	Dengue virus 2	DENV-2	(+)ssRNA	Flaviviridae
VPS37A	Dengue virus 2	DENV-2	(+)ssRNA	Flaviviridae
TM9SF3	Dengue virus 2	DENV-2	(+)ssRNA	Flaviviridae
CCT4	Dengue virus 2	DENV-2	(+)ssRNA	Flaviviridae
TMED9	Dengue virus 2	DENV-2	(+)ssRNA	Flaviviridae
KLHL22	Dengue virus 2	DENV-2	(+)ssRNA	Flaviviridae
PSME2	Dengue virus 2	DENV-2	(+)ssRNA	Flaviviridae
POM121C	Dengue virus 2	DENV-2	(+)ssRNA	Flaviviridae
TMEM43	Dengue virus 2	DENV-2	(+)ssRNA	Flaviviridae
ALG1	Dengue virus 2	DENV-2	(+)ssRNA	Flaviviridae
BMS1	Dengue virus 2	DENV-2	(+)ssRNA	Flaviviridae
ARF4	Dengue virus 2	DENV-2	(+)ssRNA	Flaviviridae
ILVBL	Dengue virus 2	DENV-2	(+)ssRNA	Flaviviridae
ZC3HAV1	Dengue virus 2	DENV-2	(+)ssRNA	Flaviviridae
TMED10	Dengue virus 2	DENV-2	(+)ssRNA	Flaviviridae
ZC3H4	Dengue virus 2	DENV-2	(+)ssRNA	Flaviviridae
ZC3H8	Dengue virus 2	DENV-2	(+)ssRNA	Flaviviridae
LARP7	Dengue virus 2	DENV-2	(+)ssRNA	Flaviviridae
ATP1A1	Dengue virus 2	DENV-2	(+)ssRNA	Flaviviridae
APOA1	Dengue virus 2	DENV-2	(+)ssRNA	Flaviviridae
EML2	Dengue virus 2	DENV-2	(+)ssRNA	Flaviviridae
FUCA2	Dengue virus 2	DENV-2	(+)ssRNA	Flaviviridae
ATP5F1C	Dengue virus 2	DENV-2	(+)ssRNA	Flaviviridae
GRWD1	Dengue virus 2	DENV-2	(+)ssRNA	Flaviviridae
RUVBL1	Dengue virus 2	DENV-2	(+)ssRNA	Flaviviridae
GOLGA2	Dengue virus 2	DENV-2	(+)ssRNA	Flaviviridae
RPS27L	Dengue virus 2	DENV-2	(+)ssRNA	Flaviviridae
ANKRD50	Dengue virus 2	DENV-2	(+)ssRNA	Flaviviridae
RFC4	Dengue virus 2	DENV-2	(+)ssRNA	Flaviviridae
UBE3A	Dengue virus 2	DENV-2	(+)ssRNA	Flaviviridae
NDUFA5	Dengue virus 2	DENV-2	(+)ssRNA	Flaviviridae
UFL1	Dengue virus 2	DENV-2	(+)ssRNA	Flaviviridae
DHX57	Dengue virus 2	DENV-2	(+)ssRNA	Flaviviridae
UQCRH	Dengue virus 2	DENV-2	(+)ssRNA	Flaviviridae
RMDN3	Dengue virus 2	DENV-2	(+)ssRNA	Flaviviridae
EMD	Dengue virus 2	DENV-2	(+)ssRNA	Flaviviridae
MRPS25	Dengue virus 2	DENV-2	(+)ssRNA	Flaviviridae
TNPO1	Dengue virus 2	DENV-2	(+)ssRNA	Flaviviridae
SEC61G	Dengue virus 2	DENV-2	(+)ssRNA	Flaviviridae
PA2G4	Dengue virus 2	DENV-2	(+)ssRNA	Flaviviridae
MRPS35	Dengue virus 2	DENV-2	(+)ssRNA	Flaviviridae
MRPS9	Dengue virus 2	DENV-2	(+)ssRNA	Flaviviridae
MRPS7	Dengue virus 2	DENV-2	(+)ssRNA	Flaviviridae
MSI1	Dengue virus 2	DENV-2	(+)ssRNA	Flaviviridae
HAX1	Dengue virus 2	DENV-2	(+)ssRNA	Flaviviridae
SEC61A1	Dengue virus 2	DENV-2	(+)ssRNA	Flaviviridae
HLA-A	Dengue virus 2	DENV-2	(+)ssRNA	Flaviviridae
HNRNPF	Dengue virus 2	DENV-2	(+)ssRNA	Flaviviridae
YIPF2	Dengue virus 2	DENV-2	(+)ssRNA	Flaviviridae
HSD17B12	Dengue virus 2	DENV-2	(+)ssRNA	Flaviviridae
GC	Dengue virus 2	DENV-2	(+)ssRNA	Flaviviridae
WDR6	Dengue virus 2	DENV-2	(+)ssRNA	Flaviviridae
ABCC4	Dengue virus 2	DENV-2	(+)ssRNA	Flaviviridae
FAM120A	Dengue virus 2	DENV-2	(+)ssRNA	Flaviviridae
CAT	Dengue virus 2	DENV-2	(+)ssRNA	Flaviviridae
ANAPC5	Dengue virus 2	DENV-2	(+)ssRNA	Flaviviridae
ANP32A	Dengue virus 2	DENV-2	(+)ssRNA	Flaviviridae
FASN	Dengue virus 2	DENV-2	(+)ssRNA	Flaviviridae
ANP32B	Dengue virus 2	DENV-2	(+)ssRNA	Flaviviridae
NAP1L4	Dengue virus 2	DENV-2	(+)ssRNA	Flaviviridae
ZNF507	Dengue virus 2	DENV-2	(+)ssRNA	Flaviviridae
CCDC88C	Dengue virus 2	DENV-2	(+)ssRNA	Flaviviridae
CCNK	Dengue virus 2	DENV-2	(+)ssRNA	Flaviviridae
AMER1	Dengue virus 2	DENV-2	(+)ssRNA	Flaviviridae
PRKRA	Dengue virus 2	DENV-2	(+)ssRNA	Flaviviridae
AGK	Dengue virus 2	DENV-2	(+)ssRNA	Flaviviridae
RFC2	Dengue virus 2	DENV-2	(+)ssRNA	Flaviviridae
CAMTA2	Dengue virus 2	DENV-2	(+)ssRNA	Flaviviridae
RFC1	Dengue virus 2	DENV-2	(+)ssRNA	Flaviviridae
MTMR14	Dengue virus 2	DENV-2	(+)ssRNA	Flaviviridae
ACTB	Dengue virus 2	DENV-2	(+)ssRNA	Flaviviridae
NDUFS5	Dengue virus 2	DENV-2	(+)ssRNA	Flaviviridae
G3BP1	Dengue virus 2	DENV-2	(+)ssRNA	Flaviviridae
HSPB1	Dengue virus 2	DENV-2	(+)ssRNA	Flaviviridae
NDUFS3	Dengue virus 2	DENV-2	(+)ssRNA	Flaviviridae
NOMO1	Dengue virus 2	DENV-2	(+)ssRNA	Flaviviridae
NTPCR	Dengue virus 2	DENV-2	(+)ssRNA	Flaviviridae
RPF2	Dengue virus 2	DENV-2	(+)ssRNA	Flaviviridae
SSR3	Dengue virus 2	DENV-2	(+)ssRNA	Flaviviridae
CAMK2B	Dengue virus 2	DENV-2	(+)ssRNA	Flaviviridae
FIGNL1	Dengue virus 2	DENV-2	(+)ssRNA	Flaviviridae
RPS2	Dengue virus 2	DENV-2	(+)ssRNA	Flaviviridae
RPS25	Dengue virus 2	DENV-2	(+)ssRNA	Flaviviridae
ACAD11	Dengue virus 2	DENV-2	(+)ssRNA	Flaviviridae
TIMM8B	Dengue virus 2	DENV-2	(+)ssRNA	Flaviviridae
RPS27	Dengue virus 2	DENV-2	(+)ssRNA	Flaviviridae
PDS5A	Dengue virus 2	DENV-2	(+)ssRNA	Flaviviridae
KPNA3	Dengue virus 2	DENV-2	(+)ssRNA	Flaviviridae
PHB	Dengue virus 2	DENV-2	(+)ssRNA	Flaviviridae
SFI1	Dengue virus 2	DENV-2	(+)ssRNA	Flaviviridae
HSP90AB1	Dengue virus 2	DENV-2	(+)ssRNA	Flaviviridae
SFXN4	Dengue virus 2	DENV-2	(+)ssRNA	Flaviviridae
SLC16A1	Dengue virus 2	DENV-2	(+)ssRNA	Flaviviridae
GRSF1	Dengue virus 2	DENV-2	(+)ssRNA	Flaviviridae
CYC1	Dengue virus 2	DENV-2	(+)ssRNA	Flaviviridae
IPO7	Dengue virus 2	DENV-2	(+)ssRNA	Flaviviridae
IVNS1ABP	Dengue virus 2	DENV-2	(+)ssRNA	Flaviviridae
JAK1	Dengue virus 2	DENV-2	(+)ssRNA	Flaviviridae
KPNB1	Dengue virus 2	DENV-2	(+)ssRNA	Flaviviridae
ATG9A	Dengue virus 2	DENV-2	(+)ssRNA	Flaviviridae
LMBR1	Dengue virus 2	DENV-2	(+)ssRNA	Flaviviridae
ATP1B3	Dengue virus 2	DENV-2	(+)ssRNA	Flaviviridae
PSMC6	Dengue virus 2	DENV-2	(+)ssRNA	Flaviviridae
FRG1	Dengue virus 2	DENV-2	(+)ssRNA	Flaviviridae
FN1	Dengue virus 2	DENV-2	(+)ssRNA	Flaviviridae
ATP5PB	Dengue virus 2	DENV-2	(+)ssRNA	Flaviviridae
UACA	Dengue virus 2	DENV-2	(+)ssRNA	Flaviviridae
UNC50	Dengue virus 2	DENV-2	(+)ssRNA	Flaviviridae
ATR	Dengue virus 2	DENV-2	(+)ssRNA	Flaviviridae
ATP5PO	Dengue virus 2	DENV-2	(+)ssRNA	Flaviviridae
NCLN	Dengue virus 2	DENV-2	(+)ssRNA	Flaviviridae
DHX30	Dengue virus 2	DENV-2	(+)ssRNA	Flaviviridae
DHX15	Dengue virus 2	DENV-2	(+)ssRNA	Flaviviridae
TAX1BP1	Dengue virus 2	DENV-2	(+)ssRNA	Flaviviridae
DHX36	Dengue virus 2	DENV-2	(+)ssRNA	Flaviviridae
TAF8	Dengue virus 2	DENV-2	(+)ssRNA	Flaviviridae
BZW2	Dengue virus 2	DENV-2	(+)ssRNA	Flaviviridae
DNAJC11	Dengue virus 2	DENV-2	(+)ssRNA	Flaviviridae
OTUD4	Dengue virus 2	DENV-2	(+)ssRNA	Flaviviridae
ECI2	Dengue virus 2	DENV-2	(+)ssRNA	Flaviviridae
TIMM44	Dengue virus 2	DENV-2	(+)ssRNA	Flaviviridae
STK11IP	Dengue virus 2	DENV-2	(+)ssRNA	Flaviviridae
STT3A	Dengue virus 2	DENV-2	(+)ssRNA	Flaviviridae
MRPS34	Dengue virus 2	DENV-2	(+)ssRNA	Flaviviridae
ENOX2	Dengue virus 2	DENV-2	(+)ssRNA	Flaviviridae
SRFBP1	Dengue virus 2	DENV-2	(+)ssRNA	Flaviviridae
PSEN1	Dengue virus 2	DENV-2	(+)ssRNA	Flaviviridae
SCFD1	Dengue virus 2	DENV-2	(+)ssRNA	Flaviviridae
CLN6	Dengue virus 2	DENV-2	(+)ssRNA	Flaviviridae
CHORDC1	Dengue virus 2	DENV-2	(+)ssRNA	Flaviviridae
TMEM200C	Dengue virus 2	DENV-2	(+)ssRNA	Flaviviridae
SEC22B	Dengue virus 2	DENV-2	(+)ssRNA	Flaviviridae
YIPF6	Dengue virus 2	DENV-2	(+)ssRNA	Flaviviridae
OXA1L	Dengue virus 2	DENV-2	(+)ssRNA	Flaviviridae
SH3GLB2	Dengue virus 2	DENV-2	(+)ssRNA	Flaviviridae
TNPO3	Dengue virus 2	DENV-2	(+)ssRNA	Flaviviridae
AMOT	Dengue virus 2	DENV-2	(+)ssRNA	Flaviviridae
TOMM70	Dengue virus 2	DENV-2	(+)ssRNA	Flaviviridae
PSMA5	Dengue virus 2	DENV-2	(+)ssRNA	Flaviviridae
RAB7A	Dengue virus 2	DENV-2	(+)ssRNA	Flaviviridae
RANBP6	Dengue virus 2	DENV-2	(+)ssRNA	Flaviviridae
SLC25A4	Dengue virus 2	DENV-2	(+)ssRNA	Flaviviridae
SLC25A40	Dengue virus 2	DENV-2	(+)ssRNA	Flaviviridae
LMNB1	Dengue virus 2	DENV-2	(+)ssRNA	Flaviviridae
RBMS1	Dengue virus 2	DENV-2	(+)ssRNA	Flaviviridae
DENND1C	Dengue virus 2	DENV-2	(+)ssRNA	Flaviviridae
MSH6	Dengue virus 2	DENV-2	(+)ssRNA	Flaviviridae
UBE2I	Dengue virus 2	DENV-2	(+)ssRNA	Flaviviridae
REPIN1	Dengue virus 2	DENV-2	(+)ssRNA	Flaviviridae
RETREG3	Dengue virus 2	DENV-2	(+)ssRNA	Flaviviridae
DNAJA1	Dengue virus 2	DENV-2	(+)ssRNA	Flaviviridae
FUNDC1	Dengue virus 2	DENV-2	(+)ssRNA	Flaviviridae
DPM1	Dengue virus 2	DENV-2	(+)ssRNA	Flaviviridae
EEF1B2	Dengue virus 2	DENV-2	(+)ssRNA	Flaviviridae
EMC1	Dengue virus 2	DENV-2	(+)ssRNA	Flaviviridae
BAG3	Dengue virus 2	DENV-2	(+)ssRNA	Flaviviridae
SPCS2	Dengue virus 2	DENV-2	(+)ssRNA	Flaviviridae
BAZ1B	Dengue virus 2	DENV-2	(+)ssRNA	Flaviviridae
SPTLC1	Dengue virus 2	DENV-2	(+)ssRNA	Flaviviridae
BCAP31	Dengue virus 2	DENV-2	(+)ssRNA	Flaviviridae
RMND1	Dengue virus 2	DENV-2	(+)ssRNA	Flaviviridae
ABT1	Dengue virus 2	DENV-2	(+)ssRNA	Flaviviridae
ABCD3	Dengue virus 2	DENV-2	(+)ssRNA	Flaviviridae
EIF1AY	Dengue virus 2	DENV-2	(+)ssRNA	Flaviviridae
PRPF39	Dengue virus 2	DENV-2	(+)ssRNA	Flaviviridae
MRPL1	Dengue virus 2	DENV-2	(+)ssRNA	Flaviviridae
MRPS5	Dengue virus 2	DENV-2	(+)ssRNA	Flaviviridae
C19orf25	Dengue virus 2	DENV-2	(+)ssRNA	Flaviviridae
LMNA	Dengue virus 2	DENV-2	(+)ssRNA	Flaviviridae
NECAB2	Dengue virus 2	DENV-2	(+)ssRNA	Flaviviridae
GPKOW	Dengue virus 2	DENV-2	(+)ssRNA	Flaviviridae
PSME3IP1	Dengue virus 2	DENV-2	(+)ssRNA	Flaviviridae
KTN1	Dengue virus 2	DENV-2	(+)ssRNA	Flaviviridae
PTCD3	Dengue virus 2	DENV-2	(+)ssRNA	Flaviviridae
IPO4	Dengue virus 2	DENV-2	(+)ssRNA	Flaviviridae
GRM4	Dengue virus 2	DENV-2	(+)ssRNA	Flaviviridae
KNTC1	Dengue virus 2	DENV-2	(+)ssRNA	Flaviviridae
MAPRE2	Dengue virus 2	DENV-2	(+)ssRNA	Flaviviridae
RAF1	Dengue virus 2	DENV-2	(+)ssRNA	Flaviviridae
MMS19	Dengue virus 2	DENV-2	(+)ssRNA	Flaviviridae
CCDC137	Dengue virus 2	DENV-2	(+)ssRNA	Flaviviridae
TUBA4A	Dengue virus 2	DENV-2	(+)ssRNA	Flaviviridae
SF3A1	Dengue virus 2	DENV-2	(+)ssRNA	Flaviviridae
NOC4L	Dengue virus 2	DENV-2	(+)ssRNA	Flaviviridae
ATP2B1	Dengue virus 2	DENV-2	(+)ssRNA	Flaviviridae
LRRK2	Dengue virus 2	DENV-2	(+)ssRNA	Flaviviridae
TTC1	Dengue virus 2	DENV-2	(+)ssRNA	Flaviviridae
NDUFB11	Dengue virus 2	DENV-2	(+)ssRNA	Flaviviridae
CDC73	Dengue virus 2	DENV-2	(+)ssRNA	Flaviviridae
NDUFB5	Dengue virus 2	DENV-2	(+)ssRNA	Flaviviridae
MT-CO2	Dengue virus 2	DENV-2	(+)ssRNA	Flaviviridae
MTHFD1	Dengue virus 2	DENV-2	(+)ssRNA	Flaviviridae
NDUFS2	Dengue virus 2	DENV-2	(+)ssRNA	Flaviviridae
NDUFS8	Dengue virus 2	DENV-2	(+)ssRNA	Flaviviridae
CHP1	Dengue virus 2	DENV-2	(+)ssRNA	Flaviviridae
NDUFV1	Dengue virus 2	DENV-2	(+)ssRNA	Flaviviridae
NDUFV2	Dengue virus 2	DENV-2	(+)ssRNA	Flaviviridae
NEFH	Dengue virus 2	DENV-2	(+)ssRNA	Flaviviridae
NUP93	Dengue virus 2	DENV-2	(+)ssRNA	Flaviviridae
NKAP	Dengue virus 2	DENV-2	(+)ssRNA	Flaviviridae
NKAPD1	Dengue virus 2	DENV-2	(+)ssRNA	Flaviviridae
STIM1	Dengue virus 2	DENV-2	(+)ssRNA	Flaviviridae
MRPS30	Dengue virus 2	DENV-2	(+)ssRNA	Flaviviridae
GNL3	Dengue virus 2	DENV-2	(+)ssRNA	Flaviviridae
HBB	Dengue virus 2	DENV-2	(+)ssRNA	Flaviviridae
EID1	Dengue virus 2	DENV-2	(+)ssRNA	Flaviviridae
KNOP1	Dengue virus 2	DENV-2	(+)ssRNA	Flaviviridae
COPS2	Dengue virus 2	DENV-2	(+)ssRNA	Flaviviridae
NSUN2	Dengue virus 2	DENV-2	(+)ssRNA	Flaviviridae
COX6B1	Dengue virus 2	DENV-2	(+)ssRNA	Flaviviridae
PHB2	Dengue virus 2	DENV-2	(+)ssRNA	Flaviviridae
HSD17B11	Dengue virus 2	DENV-2	(+)ssRNA	Flaviviridae
MRPL21	Dengue virus 2	DENV-2	(+)ssRNA	Flaviviridae
YIPF3	Dengue virus 2	DENV-2	(+)ssRNA	Flaviviridae
CXorf56	Dengue virus 2	DENV-2	(+)ssRNA	Flaviviridae
SRPRB	Dengue virus 2	DENV-2	(+)ssRNA	Flaviviridae
LARP1	Dengue virus 2	DENV-2	(+)ssRNA	Flaviviridae
ATAD3A	Dengue virus 2	DENV-2	(+)ssRNA	Flaviviridae
SEC63	Dengue virus 2	DENV-2	(+)ssRNA	Flaviviridae
SRSF2	Dengue virus 2	DENV-2	(+)ssRNA	Flaviviridae
LARP1B	Dengue virus 2	DENV-2	(+)ssRNA	Flaviviridae
DCTN1	Dengue virus 2	DENV-2	(+)ssRNA	Flaviviridae
PSMC4	Dengue virus 2	DENV-2	(+)ssRNA	Flaviviridae
ATP13A1	Dengue virus 2	DENV-2	(+)ssRNA	Flaviviridae
PSMC5	Dengue virus 2	DENV-2	(+)ssRNA	Flaviviridae
TTC37	Dengue virus 2	DENV-2	(+)ssRNA	Flaviviridae
MSH2	Dengue virus 2	DENV-2	(+)ssRNA	Flaviviridae
DERL2	Dengue virus 2	DENV-2	(+)ssRNA	Flaviviridae
ATP5MF	Dengue virus 2	DENV-2	(+)ssRNA	Flaviviridae
ATP5MG	Dengue virus 2	DENV-2	(+)ssRNA	Flaviviridae
RAB11A	Dengue virus 2	DENV-2	(+)ssRNA	Flaviviridae
MAGED1	Dengue virus 2	DENV-2	(+)ssRNA	Flaviviridae
MAP7D3	Dengue virus 2	DENV-2	(+)ssRNA	Flaviviridae
RHOT1	Dengue virus 2	DENV-2	(+)ssRNA	Flaviviridae
RBFOX2	Dengue virus 2	DENV-2	(+)ssRNA	Flaviviridae
TAB2	Dengue virus 2	DENV-2	(+)ssRNA	Flaviviridae
MATR3	Dengue virus 2	DENV-2	(+)ssRNA	Flaviviridae
RHOT2	Dengue virus 2	DENV-2	(+)ssRNA	Flaviviridae
CAD	Dengue virus 2	DENV-2	(+)ssRNA	Flaviviridae
THEM6	Dengue virus 2	DENV-2	(+)ssRNA	Flaviviridae
TIMM13	Dengue virus 2	DENV-2	(+)ssRNA	Flaviviridae
ABCA4	Dengue virus 2	DENV-2	(+)ssRNA	Flaviviridae
ABCA7	Dengue virus 2	DENV-2	(+)ssRNA	Flaviviridae
PCBP2	Dengue virus 2	DENV-2	(+)ssRNA	Flaviviridae
COX5B	Dengue virus 2	DENV-2	(+)ssRNA	Flaviviridae
NOC3L	Dengue virus 2	DENV-2	(+)ssRNA	Flaviviridae
PRPF38A	Dengue virus 2	DENV-2	(+)ssRNA	Flaviviridae
CCT3	Dengue virus 2	DENV-2	(+)ssRNA	Flaviviridae
CDIPT	Dengue virus 2	DENV-2	(+)ssRNA	Flaviviridae
PSMD1	Dengue virus 2	DENV-2	(+)ssRNA	Flaviviridae
MRPL18	Dengue virus 2	DENV-2	(+)ssRNA	Flaviviridae
AKAP8L	Dengue virus 2	DENV-2	(+)ssRNA	Flaviviridae
MTOR	Dengue virus 2	DENV-2	(+)ssRNA	Flaviviridae
CWC15	Dengue virus 2	DENV-2	(+)ssRNA	Flaviviridae
MRPL22	Dengue virus 2	DENV-2	(+)ssRNA	Flaviviridae
PTBP1	Dengue virus 2	DENV-2	(+)ssRNA	Flaviviridae
SLC1A4	Dengue virus 2	DENV-2	(+)ssRNA	Flaviviridae
PUF60	Dengue virus 2	DENV-2	(+)ssRNA	Flaviviridae
SLC1A5	Dengue virus 2	DENV-2	(+)ssRNA	Flaviviridae
TP53BP2	Dengue virus 2	DENV-2	(+)ssRNA	Flaviviridae
TRIM62	Dengue virus 2	DENV-2	(+)ssRNA	Flaviviridae
FARS2	Dengue virus 2	DENV-2	(+)ssRNA	Flaviviridae
BIRC2	Dengue virus 2	DENV-2	(+)ssRNA	Flaviviridae
FKRP	Dengue virus 2	DENV-2	(+)ssRNA	Flaviviridae
CD3G	Dengue virus 2	DENV-2	(+)ssRNA	Flaviviridae
ATP5F1B	Dengue virus 2	DENV-2	(+)ssRNA	Flaviviridae
ATP2A2	Dengue virus 2	DENV-2	(+)ssRNA	Flaviviridae
MFN1	Dengue virus 2	DENV-2	(+)ssRNA	Flaviviridae
FMR1	Dengue virus 2	DENV-2	(+)ssRNA	Flaviviridae
TTI1	Dengue virus 2	DENV-2	(+)ssRNA	Flaviviridae
ARL6IP5	Dengue virus 2	DENV-2	(+)ssRNA	Flaviviridae
ATP5ME	Dengue virus 2	DENV-2	(+)ssRNA	Flaviviridae
SLC35A2	Dengue virus 2	DENV-2	(+)ssRNA	Flaviviridae
ATP5PD	Dengue virus 2	DENV-2	(+)ssRNA	Flaviviridae
DNAJA2	Dengue virus 2	DENV-2	(+)ssRNA	Flaviviridae
ACTG1	Dengue virus 2	DENV-2	(+)ssRNA	Flaviviridae
FYB1	Dengue virus 2	DENV-2	(+)ssRNA	Flaviviridae
EIF2AK2	Dengue virus 2	DENV-2	(+)ssRNA	Flaviviridae
USP5	Dengue virus 2	DENV-2	(+)ssRNA	Flaviviridae
NID1	Dengue virus 2	DENV-2	(+)ssRNA	Flaviviridae
APBB1IP	Dengue virus 2	DENV-2	(+)ssRNA	Flaviviridae
ARHGEF2	Dengue virus 2	DENV-2	(+)ssRNA	Flaviviridae
BCL2L14	Dengue virus 2	DENV-2	(+)ssRNA	Flaviviridae
ECPAS	Dengue virus 2	DENV-2	(+)ssRNA	Flaviviridae
PRPF8	Dengue virus 2	DENV-2	(+)ssRNA	Flaviviridae
TIMM8A	Dengue virus 2	DENV-2	(+)ssRNA	Flaviviridae
SQSTM1	Dengue virus 2	DENV-2	(+)ssRNA	Flaviviridae
RPL5	Dengue virus 2	DENV-2	(+)ssRNA	Flaviviridae
MRTO4	Dengue virus 2	DENV-2	(+)ssRNA	Flaviviridae
RPL6	Dengue virus 2	DENV-2	(+)ssRNA	Flaviviridae
XRCC5	Dengue virus 2	DENV-2	(+)ssRNA	Flaviviridae
HEATR1	Dengue virus 2	DENV-2	(+)ssRNA	Flaviviridae
MRPL2	Dengue virus 2	DENV-2	(+)ssRNA	Flaviviridae
MRPL19	Dengue virus 2	DENV-2	(+)ssRNA	Flaviviridae
HUWE1	Dengue virus 2	DENV-2	(+)ssRNA	Flaviviridae
MTX2	Dengue virus 2	DENV-2	(+)ssRNA	Flaviviridae
ICMT	Dengue virus 2	DENV-2	(+)ssRNA	Flaviviridae
MYCBP	Dengue virus 2	DENV-2	(+)ssRNA	Flaviviridae
MYCBP2	Dengue virus 2	DENV-2	(+)ssRNA	Flaviviridae
HACD2	Dengue virus 2	DENV-2	(+)ssRNA	Flaviviridae
HAUS4	Dengue virus 2	DENV-2	(+)ssRNA	Flaviviridae
MYH9	Dengue virus 2	DENV-2	(+)ssRNA	Flaviviridae
HAUS7	Dengue virus 2	DENV-2	(+)ssRNA	Flaviviridae
ZCCHC3	Dengue virus 2	DENV-2	(+)ssRNA	Flaviviridae
HDGFL2	Dengue virus 2	DENV-2	(+)ssRNA	Flaviviridae
RCN2	Dengue virus 2	DENV-2	(+)ssRNA	Flaviviridae
RBM3	Dengue virus 2	DENV-2	(+)ssRNA	Flaviviridae
RBM4	Dengue virus 2	DENV-2	(+)ssRNA	Flaviviridae
CCT8	Dengue virus 2	DENV-2	(+)ssRNA	Flaviviridae
HNRNPUL2	Dengue virus 2	DENV-2	(+)ssRNA	Flaviviridae
HOOK1	Dengue virus 2	DENV-2	(+)ssRNA	Flaviviridae
CEP135	Dengue virus 2	DENV-2	(+)ssRNA	Flaviviridae
MTFP1	Dengue virus 2	DENV-2	(+)ssRNA	Flaviviridae
NDUFS1	Dengue virus 2	DENV-2	(+)ssRNA	Flaviviridae
XPO1	Dengue virus 2	DENV-2	(+)ssRNA	Flaviviridae
HSPA1L	Dengue virus 2	DENV-2	(+)ssRNA	Flaviviridae
CHCHD3	Dengue virus 2	DENV-2	(+)ssRNA	Flaviviridae
CISD1	Dengue virus 2	DENV-2	(+)ssRNA	Flaviviridae
XPO5	Dengue virus 2	DENV-2	(+)ssRNA	Flaviviridae
BAG6	Dengue virus 2	DENV-2	(+)ssRNA	Flaviviridae
ILF3	Dengue virus 2	DENV-2	(+)ssRNA	Flaviviridae
SNRNP200	Dengue virus 2	DENV-2	(+)ssRNA	Flaviviridae
JAGN1	Dengue virus 2	DENV-2	(+)ssRNA	Flaviviridae
NAP1L1	Dengue virus 2	DENV-2	(+)ssRNA	Flaviviridae
MRPS33	Dengue virus 2	DENV-2	(+)ssRNA	Flaviviridae
MTF1	Dengue virus 2	DENV-2	(+)ssRNA	Flaviviridae
RPS16	Dengue virus 2	DENV-2	(+)ssRNA	Flaviviridae
PDHB	Dengue virus 2	DENV-2	(+)ssRNA	Flaviviridae
KNG1	Dengue virus 2	DENV-2	(+)ssRNA	Flaviviridae
SPTBN2	Dengue virus 2	DENV-2	(+)ssRNA	Flaviviridae
PGRMC1	Dengue virus 2	DENV-2	(+)ssRNA	Flaviviridae
NUMA1	Dengue virus 2	DENV-2	(+)ssRNA	Flaviviridae
C4A	Dengue virus 2	DENV-2	(+)ssRNA	Flaviviridae
HSP90AA1	Dengue virus 2	DENV-2	(+)ssRNA	Flaviviridae
KRT8	Dengue virus 2	DENV-2	(+)ssRNA	Flaviviridae
AFG3L2	Dengue virus 2	DENV-2	(+)ssRNA	Flaviviridae
ACAD9	Dengue virus 2	DENV-2	(+)ssRNA	Flaviviridae
CYB5R1	Dengue virus 2	DENV-2	(+)ssRNA	Flaviviridae
PAF1	Dengue virus 2	DENV-2	(+)ssRNA	Flaviviridae
ARL1	Dengue virus 2	DENV-2	(+)ssRNA	Flaviviridae
PSMA1	Dengue virus 2	DENV-2	(+)ssRNA	Flaviviridae
PCM1	Dengue virus 2	DENV-2	(+)ssRNA	Flaviviridae
LBR	Dengue virus 2	DENV-2	(+)ssRNA	Flaviviridae
PSMC3	Dengue virus 2	DENV-2	(+)ssRNA	Flaviviridae
DCUN1D4	Dengue virus 2	DENV-2	(+)ssRNA	Flaviviridae
STOML2	Dengue virus 2	DENV-2	(+)ssRNA	Flaviviridae
PSMD2	Dengue virus 2	DENV-2	(+)ssRNA	Flaviviridae
HNRNPR	Dengue virus 2	DENV-2	(+)ssRNA	Flaviviridae
LRRC59	Dengue virus 2	DENV-2	(+)ssRNA	Flaviviridae
PTDSS1	Dengue virus 2	DENV-2	(+)ssRNA	Flaviviridae
DDX28	Dengue virus 2	DENV-2	(+)ssRNA	Flaviviridae
LUC7L3	Dengue virus 2	DENV-2	(+)ssRNA	Flaviviridae
PTPMT1	Dengue virus 2	DENV-2	(+)ssRNA	Flaviviridae
RACK1	Dengue virus 2	DENV-2	(+)ssRNA	Flaviviridae
DGCR8	Dengue virus 2	DENV-2	(+)ssRNA	Flaviviridae
DDX55	Dengue virus 2	DENV-2	(+)ssRNA	Flaviviridae
AUP1	Dengue virus 2	DENV-2	(+)ssRNA	Flaviviridae
POLE	Dengue virus 2	DENV-2	(+)ssRNA	Flaviviridae
POLRMT	Dengue virus 2	DENV-2	(+)ssRNA	Flaviviridae
MRPS22	Dengue virus 2	DENV-2	(+)ssRNA	Flaviviridae
BSG	Dengue virus 2	DENV-2	(+)ssRNA	Flaviviridae
DPM3	Dengue virus 2	DENV-2	(+)ssRNA	Flaviviridae
THRAP3	Dengue virus 2	DENV-2	(+)ssRNA	Flaviviridae
RPN1	Dengue virus 2	DENV-2	(+)ssRNA	Flaviviridae
PARL	Dengue virus 2	DENV-2	(+)ssRNA	Flaviviridae
KDSR	Dengue virus 2	DENV-2	(+)ssRNA	Flaviviridae
KIAA2013	Dengue virus 2	DENV-2	(+)ssRNA	Flaviviridae
MPDU1	Dengue virus 2	DENV-2	(+)ssRNA	Flaviviridae
MIPEP	Dengue virus 2	DENV-2	(+)ssRNA	Flaviviridae
MRPL15	Dengue virus 2	DENV-2	(+)ssRNA	Flaviviridae
CCT5	Dengue virus 2	DENV-2	(+)ssRNA	Flaviviridae
PRR3	Dengue virus 2	DENV-2	(+)ssRNA	Flaviviridae
TMEM161A	Dengue virus 2	DENV-2	(+)ssRNA	Flaviviridae
RRP12	Dengue virus 2	DENV-2	(+)ssRNA	Flaviviridae
HSD17B10	Dengue virus 2	DENV-2	(+)ssRNA	Flaviviridae
PHLDB3	Dengue virus 2	DENV-2	(+)ssRNA	Flaviviridae
COPA	Dengue virus 2	DENV-2	(+)ssRNA	Flaviviridae
COMMD2	Dengue virus 2	DENV-2	(+)ssRNA	Flaviviridae
COPB2	Dengue virus 2	DENV-2	(+)ssRNA	Flaviviridae
PURA	Dengue virus 2	DENV-2	(+)ssRNA	Flaviviridae
SLC25A10	Dengue virus 2	DENV-2	(+)ssRNA	Flaviviridae
PYM1	Dengue virus 2	DENV-2	(+)ssRNA	Flaviviridae
RAB1A	Dengue virus 2	DENV-2	(+)ssRNA	Flaviviridae
TRIM26	Dengue virus 2	DENV-2	(+)ssRNA	Flaviviridae
BOD1L1	Dengue virus 2	DENV-2	(+)ssRNA	Flaviviridae
FGA	Dengue virus 2	DENV-2	(+)ssRNA	Flaviviridae
ARHGEF4	Dengue virus 2	DENV-2	(+)ssRNA	Flaviviridae
LNPK	Dengue virus 2	DENV-2	(+)ssRNA	Flaviviridae
DDX39B	Dengue virus 2	DENV-2	(+)ssRNA	Flaviviridae
SLC25A6	Dengue virus 2	DENV-2	(+)ssRNA	Flaviviridae
ATAD1	Dengue virus 2	DENV-2	(+)ssRNA	Flaviviridae
MRPL49	Dengue virus 2	DENV-2	(+)ssRNA	Flaviviridae
DHX9	Dengue virus 2	DENV-2	(+)ssRNA	Flaviviridae
DNAAF5	Dengue virus 2	DENV-2	(+)ssRNA	Flaviviridae
UBXN2A	Dengue virus 2	DENV-2	(+)ssRNA	Flaviviridae
ACTA2	Dengue virus 2	DENV-2	(+)ssRNA	Flaviviridae
SLC35B2	Dengue virus 2	DENV-2	(+)ssRNA	Flaviviridae
EEF1G	Dengue virus 2	DENV-2	(+)ssRNA	Flaviviridae
SLC7A5	Dengue virus 2	DENV-2	(+)ssRNA	Flaviviridae
XPOT	Dengue virus 2	DENV-2	(+)ssRNA	Flaviviridae
IGF2BP2	Dengue virus 2	DENV-2	(+)ssRNA	Flaviviridae
IGF2BP3	Dengue virus 2	DENV-2	(+)ssRNA	Flaviviridae
ACTG2	Dengue virus 2	DENV-2	(+)ssRNA	Flaviviridae
AXIN1	Dengue virus 2	DENV-2	(+)ssRNA	Flaviviridae
CANX	Dengue virus 2	DENV-2	(+)ssRNA	Flaviviridae
RPN2	Dengue virus 2	DENV-2	(+)ssRNA	Flaviviridae
ABCC1	Dengue virus 2	DENV-2	(+)ssRNA	Flaviviridae
KIF1B	Dengue virus 2	DENV-2	(+)ssRNA	Flaviviridae
SPTAN1	Dengue virus 2	DENV-2	(+)ssRNA	Flaviviridae
ENO1	Dengue virus 2	DENV-2	(+)ssRNA	Flaviviridae
NOM1	Dengue virus 2	DENV-2	(+)ssRNA	Flaviviridae
MSI2	Dengue virus 2	DENV-2	(+)ssRNA	Flaviviridae
C1orf35	Dengue virus 2	DENV-2	(+)ssRNA	Flaviviridae
NUP210	Dengue virus 2	DENV-2	(+)ssRNA	Flaviviridae
AMFR	Dengue virus 2	DENV-2	(+)ssRNA	Flaviviridae
POR	Dengue virus 2	DENV-2	(+)ssRNA	Flaviviridae
HSPA8	Dengue virus 2	DENV-2	(+)ssRNA	Flaviviridae
HSPD1	Dengue virus 2	DENV-2	(+)ssRNA	Flaviviridae
SEC31A	Dengue virus 2	DENV-2	(+)ssRNA	Flaviviridae
CBX5	Dengue virus 2	DENV-2	(+)ssRNA	Flaviviridae
CCAR2	Dengue virus 2	DENV-2	(+)ssRNA	Flaviviridae
MYH14	Dengue virus 2	DENV-2	(+)ssRNA	Flaviviridae
CCDC12	Dengue virus 2	DENV-2	(+)ssRNA	Flaviviridae
SERPIND1	Dengue virus 2	DENV-2	(+)ssRNA	Flaviviridae
NCBP1	Dengue virus 2	DENV-2	(+)ssRNA	Flaviviridae
MAN1B1	Dengue virus 2	DENV-2	(+)ssRNA	Flaviviridae
TUBB1	Dengue virus 2	DENV-2	(+)ssRNA	Flaviviridae
TRIP11	Dengue virus 2	DENV-2	(+)ssRNA	Flaviviridae
MCM3	Dengue virus 2	DENV-2	(+)ssRNA	Flaviviridae
HNRNPUL1	Dengue virus 2	DENV-2	(+)ssRNA	Flaviviridae
NDUFB10	Dengue virus 2	DENV-2	(+)ssRNA	Flaviviridae
UQCRC2	Dengue virus 2	DENV-2	(+)ssRNA	Flaviviridae
CGNL1	Dengue virus 2	DENV-2	(+)ssRNA	Flaviviridae
MT-ATP6	Dengue virus 2	DENV-2	(+)ssRNA	Flaviviridae
NDUFB9	Dengue virus 2	DENV-2	(+)ssRNA	Flaviviridae
NDUFB8	Dengue virus 2	DENV-2	(+)ssRNA	Flaviviridae
TUBB	Dengue virus 2	DENV-2	(+)ssRNA	Flaviviridae
HSPA4	Dengue virus 2	DENV-2	(+)ssRNA	Flaviviridae
YME1L1	Dengue virus 2	DENV-2	(+)ssRNA	Flaviviridae
MAPKAPK5	Dengue virus 2	DENV-2	(+)ssRNA	Flaviviridae
PPM1G	Dengue virus 2	DENV-2	(+)ssRNA	Flaviviridae
PPP1CB	Dengue virus 2	DENV-2	(+)ssRNA	Flaviviridae
CISD2	Dengue virus 2	DENV-2	(+)ssRNA	Flaviviridae
ILF2	Dengue virus 2	DENV-2	(+)ssRNA	Flaviviridae
LRRFIP1	Dengue virus 2	DENV-2	(+)ssRNA	Flaviviridae
SPNS1	Dengue virus 2	DENV-2	(+)ssRNA	Flaviviridae
AZI2	Dengue virus 2	DENV-2	(+)ssRNA	Flaviviridae
CCDC47	Dengue virus 2	DENV-2	(+)ssRNA	Flaviviridae
COMT	Dengue virus 2	DENV-2	(+)ssRNA	Flaviviridae
PCNA	Dengue virus 2	DENV-2	(+)ssRNA	Flaviviridae
SURF1	Dengue virus 2	DENV-2	(+)ssRNA	Flaviviridae
SPG7	Dengue virus 2	DENV-2	(+)ssRNA	Flaviviridae
NSUN5	Dengue virus 2	DENV-2	(+)ssRNA	Flaviviridae
CDK1	Dengue virus 2	DENV-2	(+)ssRNA	Flaviviridae
C12orf43	Dengue virus 2	DENV-2	(+)ssRNA	Flaviviridae
S100A9	Dengue virus 2	DENV-2	(+)ssRNA	Flaviviridae
PRKDC	Dengue virus 2	DENV-2	(+)ssRNA	Flaviviridae
OS9	Dengue virus 2	DENV-2	(+)ssRNA	Flaviviridae
SRPK1	Dengue virus 2	DENV-2	(+)ssRNA	Flaviviridae
CYRIB	Dengue virus 2	DENV-2	(+)ssRNA	Flaviviridae
LARP4	Dengue virus 2	DENV-2	(+)ssRNA	Flaviviridae
DARS2	Dengue virus 2	DENV-2	(+)ssRNA	Flaviviridae
G6PD	Dengue virus 2	DENV-2	(+)ssRNA	Flaviviridae
PDCD6IP	Dengue virus 2	DENV-2	(+)ssRNA	Flaviviridae
DCAF10	Dengue virus 2	DENV-2	(+)ssRNA	Flaviviridae
PEX19	Dengue virus 2	DENV-2	(+)ssRNA	Flaviviridae
PEX11B	Dengue virus 2	DENV-2	(+)ssRNA	Flaviviridae
PFDN2	Dengue virus 2	DENV-2	(+)ssRNA	Flaviviridae
SUCLG1	Dengue virus 2	DENV-2	(+)ssRNA	Flaviviridae
PSMD3	Dengue virus 2	DENV-2	(+)ssRNA	Flaviviridae
PFKL	Dengue virus 2	DENV-2	(+)ssRNA	Flaviviridae
PGK1	Dengue virus 2	DENV-2	(+)ssRNA	Flaviviridae
DDX50	Dengue virus 2	DENV-2	(+)ssRNA	Flaviviridae
RAB10	Dengue virus 2	DENV-2	(+)ssRNA	Flaviviridae
PHF8	Dengue virus 2	DENV-2	(+)ssRNA	Flaviviridae
PIAS1	Dengue virus 2	DENV-2	(+)ssRNA	Flaviviridae
ATXN10	Dengue virus 2	DENV-2	(+)ssRNA	Flaviviridae
PIGS	Dengue virus 2	DENV-2	(+)ssRNA	Flaviviridae
ATP6V1A	Dengue virus 2	DENV-2	(+)ssRNA	Flaviviridae
SLC4A1AP	Dengue virus 2	DENV-2	(+)ssRNA	Flaviviridae
RILPL2	Dengue virus 2	DENV-2	(+)ssRNA	Flaviviridae
SLC6A17	Dengue virus 2	DENV-2	(+)ssRNA	Flaviviridae
RNGTT	Dengue virus 2	DENV-2	(+)ssRNA	Flaviviridae
RPL23	Dengue virus 2	DENV-2	(+)ssRNA	Flaviviridae
PQBP1	Dengue virus 2	DENV-2	(+)ssRNA	Flaviviridae
COBLL1	Dengue virus 2	DENV-2	(+)ssRNA	Flaviviridae
KDM1A	Dengue virus 2	DENV-2	(+)ssRNA	Flaviviridae
PABPC1	Dengue virus 2	DENV-2	(+)ssRNA	Flaviviridae
RPS15A	Dengue virus 2	DENV-2	(+)ssRNA	Flaviviridae
PRPF3	Dengue virus 2	DENV-2	(+)ssRNA	Flaviviridae
KIF1C	Dengue virus 2	DENV-2	(+)ssRNA	Flaviviridae
CCT2	Dengue virus 2	DENV-2	(+)ssRNA	Flaviviridae
TCP1	Dengue virus 2	DENV-2	(+)ssRNA	Flaviviridae
GPAT3	Dengue virus 2	DENV-2	(+)ssRNA	Flaviviridae
CUL7	Dengue virus 2	DENV-2	(+)ssRNA	Flaviviridae
PRPSAP1	Dengue virus 2	DENV-2	(+)ssRNA	Flaviviridae
MTCH2	Dengue virus 2	DENV-2	(+)ssRNA	Flaviviridae
MRPL20	Dengue virus 2	DENV-2	(+)ssRNA	Flaviviridae
CLPTM1	Dengue virus 2	DENV-2	(+)ssRNA	Flaviviridae
MRPL24	Dengue virus 2	DENV-2	(+)ssRNA	Flaviviridae
MRPL3	Dengue virus 2	DENV-2	(+)ssRNA	Flaviviridae
PWP1	Dengue virus 2	DENV-2	(+)ssRNA	Flaviviridae
SLC25A1	Dengue virus 2	DENV-2	(+)ssRNA	Flaviviridae
TOP2A	Dengue virus 2	DENV-2	(+)ssRNA	Flaviviridae
COX15	Dengue virus 2	DENV-2	(+)ssRNA	Flaviviridae
SLC25A22	Dengue virus 2	DENV-2	(+)ssRNA	Flaviviridae
SLC25A3	Dengue virus 2	DENV-2	(+)ssRNA	Flaviviridae
FGB	Dengue virus 2	DENV-2	(+)ssRNA	Flaviviridae
DECR1	Dengue virus 2	DENV-2	(+)ssRNA	Flaviviridae
MRPL46	Dengue virus 2	DENV-2	(+)ssRNA	Flaviviridae
SLC25A5	Dengue virus 2	DENV-2	(+)ssRNA	Flaviviridae
U2SURP	Dengue virus 2	DENV-2	(+)ssRNA	Flaviviridae
MRPL48	Dengue virus 2	DENV-2	(+)ssRNA	Flaviviridae
DHCR7	Dengue virus 2	DENV-2	(+)ssRNA	Flaviviridae
DNTTIP2	Dengue virus 2	DENV-2	(+)ssRNA	Flaviviridae
EAF1	Dengue virus 2	DENV-2	(+)ssRNA	Flaviviridae
MRPL9	Dengue virus 2	DENV-2	(+)ssRNA	Flaviviridae
MRPS17	Dengue virus 2	DENV-2	(+)ssRNA	Flaviviridae
MRPS2	Dengue virus 2	DENV-2	(+)ssRNA	Flaviviridae
SYNGR1	Dengue virus 2	DENV-2	(+)ssRNA	Flaviviridae
HSPA4L	Dengue virus 2	DENV-2	(+)ssRNA	Flaviviridae
MRPS21	Dengue virus 2	DENV-2	(+)ssRNA	Flaviviridae
CKB	Dengue virus 2	DENV-2	(+)ssRNA	Flaviviridae
HYOU1	Dengue virus 2	DENV-2	(+)ssRNA	Flaviviridae
SSR1	Dengue virus 2	DENV-2	(+)ssRNA	Flaviviridae
MDN1	Dengue virus 2	DENV-2	(+)ssRNA	Flaviviridae
CAPZA1	Dengue virus 2	DENV-2	(+)ssRNA	Flaviviridae
DST	Dengue virus 2	DENV-2	(+)ssRNA	Flaviviridae
SNRPB	Dengue virus 2	DENV-2	(+)ssRNA	Flaviviridae
COMMD4	Dengue virus 2	DENV-2	(+)ssRNA	Flaviviridae
MLEC	Dengue virus 2	DENV-2	(+)ssRNA	Flaviviridae
SNRPB2	Dengue virus 2	DENV-2	(+)ssRNA	Flaviviridae
TRAFD1	Dengue virus 2	DENV-2	(+)ssRNA	Flaviviridae
BYSL	Dengue virus 2	DENV-2	(+)ssRNA	Flaviviridae
RPS7	Dengue virus 2	DENV-2	(+)ssRNA	Flaviviridae
TUBB4B	Dengue virus 2	DENV-2	(+)ssRNA	Flaviviridae
KRR1	Dengue virus 2	DENV-2	(+)ssRNA	Flaviviridae
MTX1	Dengue virus 2	DENV-2	(+)ssRNA	Flaviviridae
HSPA1A	Dengue virus 2	DENV-2	(+)ssRNA	Flaviviridae
MYBBP1A	Dengue virus 2	DENV-2	(+)ssRNA	Flaviviridae
CAND2	Dengue virus 2	DENV-2	(+)ssRNA	Flaviviridae
SCMH1	Dengue virus 2	DENV-2	(+)ssRNA	Flaviviridae
TRIP13	Dengue virus 2	DENV-2	(+)ssRNA	Flaviviridae
TNIP1	Dengue virus 2	DENV-2	(+)ssRNA	Flaviviridae
TRAF4	Dengue virus 2	DENV-2	(+)ssRNA	Flaviviridae
VDAC3	Dengue virus 2	DENV-2	(+)ssRNA	Flaviviridae
SET	Dengue virus 2	DENV-2	(+)ssRNA	Flaviviridae
ZFR	Dengue virus 2	DENV-2	(+)ssRNA	Flaviviridae
SLC39A14	Dengue virus 2	DENV-2	(+)ssRNA	Flaviviridae
CCT6A	Dengue virus 2	DENV-2	(+)ssRNA	Flaviviridae
CDC37	Dengue virus 2	DENV-2	(+)ssRNA	Flaviviridae
CCT7	Dengue virus 2	DENV-2	(+)ssRNA	Flaviviridae
ZW10	Dengue virus 2	DENV-2	(+)ssRNA	Flaviviridae
UNC45A	Dengue virus 2	DENV-2	(+)ssRNA	Flaviviridae
VDAC1	Dengue virus 2	DENV-2	(+)ssRNA	Flaviviridae
VDAC2	Dengue virus 2	DENV-2	(+)ssRNA	Flaviviridae
TUBA1C	Dengue virus 2	DENV-2	(+)ssRNA	Flaviviridae
TELO2	Dengue virus 2	DENV-2	(+)ssRNA	Flaviviridae
SNRPC	Dengue virus 2	DENV-2	(+)ssRNA	Flaviviridae
SLC25A19	Dengue virus 2	DENV-2	(+)ssRNA	Flaviviridae
SLC30A7	Dengue virus 2	DENV-2	(+)ssRNA	Flaviviridae
DCTN2	Dengue virus 2	DENV-2	(+)ssRNA	Flaviviridae
MBOAT7	Dengue virus 2	DENV-2	(+)ssRNA	Flaviviridae
HTATSF1	Dengue virus 2	DENV-2	(+)ssRNA	Flaviviridae
SMARCA5	Dengue virus 2	DENV-2	(+)ssRNA	Flaviviridae
SRP14	Dengue virus 2	DENV-2	(+)ssRNA	Flaviviridae
SLC7A1	Dengue virus 2	DENV-2	(+)ssRNA	Flaviviridae
IMPDH2	Dengue virus 2	DENV-2	(+)ssRNA	Flaviviridae
MOV10	Dengue virus 2	DENV-2	(+)ssRNA	Flaviviridae
NKRF	Dengue virus 2	DENV-2	(+)ssRNA	Flaviviridae
COL12A1	Dengue virus 2	DENV-2	(+)ssRNA	Flaviviridae
SRSF12	Dengue virus 2	DENV-2	(+)ssRNA	Flaviviridae
EEF1A1	Dengue virus 2	DENV-2	(+)ssRNA	Flaviviridae
PSMB2	Dengue virus 2	DENV-2	(+)ssRNA	Flaviviridae
SYNE2	Dengue virus 2	DENV-2	(+)ssRNA	Flaviviridae
PKM	Dengue virus 2	DENV-2	(+)ssRNA	Flaviviridae
TBR1	Dengue virus 2	DENV-2	(+)ssRNA	Flaviviridae
SRPRA	Dengue virus 2	DENV-2	(+)ssRNA	Flaviviridae
DDX21	Dengue virus 2	DENV-2	(+)ssRNA	Flaviviridae
MTDH	Dengue virus 2	DENV-2	(+)ssRNA	Flaviviridae
MRPL23	Dengue virus 2	DENV-2	(+)ssRNA	Flaviviridae
MRPL28	Dengue virus 2	DENV-2	(+)ssRNA	Flaviviridae
PAIP1	Dengue virus 2	DENV-2	(+)ssRNA	Flaviviridae
PDCD11	Dengue virus 2	DENV-2	(+)ssRNA	Flaviviridae
PIGO	Dengue virus 2	DENV-2	(+)ssRNA	Flaviviridae
SYNJ2BP	Dengue virus 2	DENV-2	(+)ssRNA	Flaviviridae
MAPKAP1	Dengue virus 2	DENV-2	(+)ssRNA	Flaviviridae
COPG1	Dengue virus 2	DENV-2	(+)ssRNA	Flaviviridae
SIRT1	Dengue virus 2	DENV-2	(+)ssRNA	Flaviviridae
PEX3	Dengue virus 2	DENV-2	(+)ssRNA	Flaviviridae
STT3B	Dengue virus 2	DENV-2	(+)ssRNA	Flaviviridae
DIMT1	Dengue virus 2	DENV-2	(+)ssRNA	Flaviviridae
DDX23	Dengue virus 2	DENV-2	(+)ssRNA	Flaviviridae
PGRMC2	Dengue virus 2	DENV-2	(+)ssRNA	Flaviviridae
DDX5	Dengue virus 2	DENV-2	(+)ssRNA	Flaviviridae
QSOX2	Dengue virus 2	DENV-2	(+)ssRNA	Flaviviridae
DDX49	Dengue virus 2	DENV-2	(+)ssRNA	Flaviviridae
SNRNP70	Dengue virus 2	DENV-2	(+)ssRNA	Flaviviridae
COG1	Dengue virus 2	DENV-2	(+)ssRNA	Flaviviridae
TMEM33	Dengue virus 2	DENV-2	(+)ssRNA	Flaviviridae
SYF2	Dengue virus 2	DENV-2	(+)ssRNA	Flaviviridae
TRMT112	Dengue virus 2	DENV-2	(+)ssRNA	Flaviviridae
GTPBP4	Dengue virus 2	DENV-2	(+)ssRNA	Flaviviridae
MCU	Dengue virus 2	DENV-2	(+)ssRNA	Flaviviridae
CALCOCO2	Dengue virus 2	DENV-2	(+)ssRNA	Flaviviridae
CALR	Dengue virus 2	DENV-2	(+)ssRNA	Flaviviridae
KRI1	Dengue virus 2	DENV-2	(+)ssRNA	Flaviviridae
CNOT1	Dengue virus 2	DENV-2	(+)ssRNA	Flaviviridae
HSPA5	Dengue virus 2	DENV-2	(+)ssRNA	Flaviviridae
PREB	Dengue virus 2	DENV-2	(+)ssRNA	Flaviviridae
PURB	Dengue virus 2	DENV-2	(+)ssRNA	Flaviviridae
RAB14	Dengue virus 2	DENV-2	(+)ssRNA	Flaviviridae
SLC2A1	Dengue virus 2	DENV-2	(+)ssRNA	Flaviviridae
PCNT	Dengue virus 2	DENV-2	(+)ssRNA	Flaviviridae
SFXN2	Dengue virus 2	DENV-2	(+)ssRNA	Flaviviridae
TSR1	Dengue virus 2	DENV-2	(+)ssRNA	Flaviviridae
NUP205	Dengue virus 2	DENV-2	(+)ssRNA	Flaviviridae
DCAKD	Dengue virus 2	DENV-2	(+)ssRNA	Flaviviridae
DDOST	Dengue virus 2	DENV-2	(+)ssRNA	Flaviviridae
CYTIP	Dengue virus 2	DENV-2	(+)ssRNA	Flaviviridae
PRMT5	Dengue virus 2	DENV-2	(+)ssRNA	Flaviviridae
CAND1	Dengue virus 2	DENV-2	(+)ssRNA	Flaviviridae
ZNF394	Dengue virus 2	DENV-2	(+)ssRNA	Flaviviridae
MRPL55	Dengue virus 2	DENV-2	(+)ssRNA	Flaviviridae
ATP5F1D	Dengue virus 2	DENV-2	(+)ssRNA	Flaviviridae
TOMM22	Dengue virus 2	DENV-2	(+)ssRNA	Flaviviridae
SYNE1	Dengue virus 2	DENV-2	(+)ssRNA	Flaviviridae
PATL1	Dengue virus 2	DENV-2	(+)ssRNA	Flaviviridae
STAU1	Dengue virus 2	DENV-2	(+)ssRNA	Flaviviridae
MRPL47	Dengue virus 2	DENV-2	(+)ssRNA	Flaviviridae
HAUS8	Dengue virus 2	DENV-2	(+)ssRNA	Flaviviridae
YWHAG	Dengue virus 2	DENV-2	(+)ssRNA	Flaviviridae
ACTRT1	Dengue virus 2	DENV-2	(+)ssRNA	Flaviviridae
SERPINH1	Dengue virus 2	DENV-2	(+)ssRNA	Flaviviridae
ZNF787	Dengue virus 2	DENV-2	(+)ssRNA	Flaviviridae
MRPL54	Dengue virus 2	DENV-2	(+)ssRNA	Flaviviridae
IWS1	Dengue virus 2	DENV-2	(+)ssRNA	Flaviviridae
MFAP1	Dengue virus 2	DENV-2	(+)ssRNA	Flaviviridae
SLIRP	Dengue virus 2	DENV-2	(+)ssRNA	Flaviviridae
ADAR	Dengue virus 2	DENV-2	(+)ssRNA	Flaviviridae
SIGMAR1	Dengue virus 2	DENV-2	(+)ssRNA	Flaviviridae
XPA	Dengue virus 2	DENV-2	(+)ssRNA	Flaviviridae
SLC25A12	Dengue virus 2	DENV-2	(+)ssRNA	Flaviviridae
PDIA3	Dengue virus 2	DENV-2	(+)ssRNA	Flaviviridae
PHGDH	Dengue virus 2	DENV-2	(+)ssRNA	Flaviviridae
HEXIM1	Dengue virus 2	DENV-2	(+)ssRNA	Flaviviridae
NFKBIA	Dengue virus 2	DENV-2	(+)ssRNA	Flaviviridae
PRDX6	Dengue virus 2	DENV-2	(+)ssRNA	Flaviviridae
CMSS1	Dengue virus 2	DENV-2	(+)ssRNA	Flaviviridae
WWP1	Dengue virus 2	DENV-2	(+)ssRNA	Flaviviridae
ZBTB8OS	Dengue virus 2	DENV-2	(+)ssRNA	Flaviviridae
SNRPA	Dengue virus 2	DENV-2	(+)ssRNA	Flaviviridae
PHF6	Dengue virus 2	DENV-2	(+)ssRNA	Flaviviridae
ZNF410	Dengue virus 2	DENV-2	(+)ssRNA	Flaviviridae
TMEM41B	Dengue virus 2	DENV-2	(+)ssRNA	Flaviviridae
MAGED2	Dengue virus 2	DENV-2	(+)ssRNA	Flaviviridae
TMCO1	Dengue virus 2	DENV-2	(+)ssRNA	Flaviviridae
HERPUD1	Dengue virus 2	DENV-2	(+)ssRNA	Flaviviridae
SLC5A6	Dengue virus 2	DENV-2	(+)ssRNA	Flaviviridae
HLA-C	Dengue virus 2	DENV-2	(+)ssRNA	Flaviviridae
NME3	Dengue virus 2	DENV-2	(+)ssRNA	Flaviviridae
CALU	Dengue virus 2	DENV-2	(+)ssRNA	Flaviviridae
HP1BP3	Dengue virus 2	DENV-2	(+)ssRNA	Flaviviridae
NDUFB7	Dengue virus 2	DENV-2	(+)ssRNA	Flaviviridae
SRSF11	Dengue virus 2	DENV-2	(+)ssRNA	Flaviviridae
CALD1	Dengue virus 2	DENV-2	(+)ssRNA	Flaviviridae
DFFB	Dengue virus 2	DENV-2	(+)ssRNA	Flaviviridae
SGPL1	Dengue virus 2	DENV-2	(+)ssRNA	Flaviviridae
MRPL37	Dengue virus 2	DENV-2	(+)ssRNA	Flaviviridae
DHRS7B	Dengue virus 2	DENV-2	(+)ssRNA	Flaviviridae
STAT2	Dengue virus 2	DENV-2	(+)ssRNA	Flaviviridae
SURF4	Dengue virus 2	DENV-2	(+)ssRNA	Flaviviridae
MTARC1	Dengue virus 2	DENV-2	(+)ssRNA	Flaviviridae
SUB1	Dengue virus 2	DENV-2	(+)ssRNA	Flaviviridae
SUPT16H	Dengue virus 2	DENV-2	(+)ssRNA	Flaviviridae
TFRC	Dengue virus 2	DENV-2	(+)ssRNA	Flaviviridae
PRMT1	Dengue virus 2	DENV-2	(+)ssRNA	Flaviviridae
DDX3X	Dengue virus 2	DENV-2	(+)ssRNA	Flaviviridae
PLS3	Dengue virus 2	DENV-2	(+)ssRNA	Flaviviridae
MRPL32	Dengue virus 2	DENV-2	(+)ssRNA	Flaviviridae
SEC62	Dengue virus 2	DENV-2	(+)ssRNA	Flaviviridae
TMEM165	Dengue virus 2	DENV-2	(+)ssRNA	Flaviviridae
UBR5	Dengue virus 2	DENV-2	(+)ssRNA	Flaviviridae
AP3B1	Dengue virus 2	DENV-2	(+)ssRNA	Flaviviridae
DDHD2	Dengue virus 2	DENV-2	(+)ssRNA	Flaviviridae
NRBP1	Dengue virus 2	DENV-2	(+)ssRNA	Flaviviridae
NUP50	Dengue virus 2	DENV-2	(+)ssRNA	Flaviviridae
CTNNB1	Dengue virus 2	DENV-2	(+)ssRNA	Flaviviridae
ZRANB2	Dengue virus 2	DENV-2	(+)ssRNA	Flaviviridae
TIMM17B	Dengue virus 2	DENV-2	(+)ssRNA	Flaviviridae
UBAP2L	Dengue virus 2	DENV-2	(+)ssRNA	Flaviviridae
DERL1	Dengue virus 2	DENV-2	(+)ssRNA	Flaviviridae
SLC27A4	Dengue virus 2	DENV-2	(+)ssRNA	Flaviviridae
USP9X	Dengue virus 2	DENV-2	(+)ssRNA	Flaviviridae
SYNCRIP	Dengue virus 2	DENV-2	(+)ssRNA	Flaviviridae
UBAC2	Dengue virus 2	DENV-2	(+)ssRNA	Flaviviridae
UGGT1	Dengue virus 2	DENV-2	(+)ssRNA	Flaviviridae
MRPL38	Dengue virus 2	DENV-2	(+)ssRNA	Flaviviridae
CPSF7	Dengue virus 2	DENV-2	(+)ssRNA	Flaviviridae
STRBP	Dengue virus 2	DENV-2	(+)ssRNA	Flaviviridae
CORO1A	Dengue virus 2	DENV-2	(+)ssRNA	Flaviviridae
TARDBP	Dengue virus 2	DENV-2	(+)ssRNA	Flaviviridae
SYBU	Dengue virus 2	DENV-2	(+)ssRNA	Flaviviridae
MRPL50	Dengue virus 2	DENV-2	(+)ssRNA	Flaviviridae
DDX18	Dengue virus 2	DENV-2	(+)ssRNA	Flaviviridae
TMF1	Dengue virus 2	DENV-2	(+)ssRNA	Flaviviridae
STX18	Dengue virus 2	DENV-2	(+)ssRNA	Flaviviridae
TIMM50	Dengue virus 2	DENV-2	(+)ssRNA	Flaviviridae
CTR9	Dengue virus 2	DENV-2	(+)ssRNA	Flaviviridae
ZNF688	Dengue virus 2	DENV-2	(+)ssRNA	Flaviviridae
TRIM2	Dengue virus 2	DENV-2	(+)ssRNA	Flaviviridae
CSE1L	Dengue virus 2	DENV-2	(+)ssRNA	Flaviviridae
TUBB6	Dengue virus 2	DENV-2	(+)ssRNA	Flaviviridae
TECR	Dengue virus 2	DENV-2	(+)ssRNA	Flaviviridae
NDUFA13	Dengue virus 2	DENV-2	(+)ssRNA	Flaviviridae
VIM	Dengue virus 2	DENV-2	(+)ssRNA	Flaviviridae
PHAX	Dengue virus 2	DENV-2	(+)ssRNA	Flaviviridae
CCT6B	Dengue virus 2	DENV-2	(+)ssRNA	Flaviviridae
CDC5L	Dengue virus 2	DENV-2	(+)ssRNA	Flaviviridae
MRPL43	Dengue virus 2	DENV-2	(+)ssRNA	Flaviviridae
NFKBIB	Dengue virus 2	DENV-2	(+)ssRNA	Flaviviridae
MARS1	Dengue virus 2	DENV-2	(+)ssRNA	Flaviviridae
MRPL41	Dengue virus 2	DENV-2	(+)ssRNA	Flaviviridae
STUB1	Dengue virus 2	DENV-2	(+)ssRNA	Flaviviridae
MRPL44	Dengue virus 2	DENV-2	(+)ssRNA	Flaviviridae
GDI2	Dengue virus 2	DENV-2	(+)ssRNA	Flaviviridae
MRPL45	Dengue virus 2	DENV-2	(+)ssRNA	Flaviviridae
NDUFA10	Dengue virus 2	DENV-2	(+)ssRNA	Flaviviridae
SF3B5	Dengue virus 2	DENV-2	(+)ssRNA	Flaviviridae
RPS27A	Dengue virus 2	DENV-2	(+)ssRNA	Flaviviridae
NCBP2	Dengue virus 2	DENV-2	(+)ssRNA	Flaviviridae
NCBP3	Dengue virus 2	DENV-2	(+)ssRNA	Flaviviridae
MRPL39	Dengue virus 2	DENV-2	(+)ssRNA	Flaviviridae
RSAD2	Dengue virus 2	DENV-2	(+)ssRNA	Flaviviridae
HECTD1	Dengue virus 2	DENV-2	(+)ssRNA	Flaviviridae
STOM	Dengue virus 2	DENV-2	(+)ssRNA	Flaviviridae
SF3B4	Dengue virus 2	DENV-2	(+)ssRNA	Flaviviridae
MRPL4	Dengue virus 2	DENV-2	(+)ssRNA	Flaviviridae
MRPS18B	Ebola virus	EBOV	(-)ssRNA	Filoviridae
CHD4	Ebola virus	EBOV	(-)ssRNA	Filoviridae
HNRNPA1L2	Ebola virus	EBOV	(-)ssRNA	Filoviridae
RPN2	Ebola virus	EBOV	(-)ssRNA	Filoviridae
DNAJC9	Ebola virus	EBOV	(-)ssRNA	Filoviridae
MRPL43	Ebola virus	EBOV	(-)ssRNA	Filoviridae
HNRNPA2B1	Ebola virus	EBOV	(-)ssRNA	Filoviridae
CCT7	Ebola virus	EBOV	(-)ssRNA	Filoviridae
MRPS14	Ebola virus	EBOV	(-)ssRNA	Filoviridae
RCN2	Ebola virus	EBOV	(-)ssRNA	Filoviridae
HNRNPA1	Ebola virus	EBOV	(-)ssRNA	Filoviridae
ATXN2L	Ebola virus	EBOV	(-)ssRNA	Filoviridae
RPS27A	Ebola virus	EBOV	(-)ssRNA	Filoviridae
TIMM13	Ebola virus	EBOV	(-)ssRNA	Filoviridae
TUBB	Ebola virus	EBOV	(-)ssRNA	Filoviridae
RPLP1	Ebola virus	EBOV	(-)ssRNA	Filoviridae
MRPL4	Ebola virus	EBOV	(-)ssRNA	Filoviridae
MRPS17	Ebola virus	EBOV	(-)ssRNA	Filoviridae
RPLP0	Ebola virus	EBOV	(-)ssRNA	Filoviridae
HNRNPH3	Ebola virus	EBOV	(-)ssRNA	Filoviridae
ADAR	Ebola virus	EBOV	(-)ssRNA	Filoviridae
REXO5	Ebola virus	EBOV	(-)ssRNA	Filoviridae
TRIM28	Ebola virus	EBOV	(-)ssRNA	Filoviridae
HNRNPAB	Ebola virus	EBOV	(-)ssRNA	Filoviridae
RO60	Ebola virus	EBOV	(-)ssRNA	Filoviridae
H2BU1	Ebola virus	EBOV	(-)ssRNA	Filoviridae
H2BC9	Ebola virus	EBOV	(-)ssRNA	Filoviridae
EDC4	Ebola virus	EBOV	(-)ssRNA	Filoviridae
DYNLL2	Ebola virus	EBOV	(-)ssRNA	Filoviridae
PPAN	Ebola virus	EBOV	(-)ssRNA	Filoviridae
BORCS5	Ebola virus	EBOV	(-)ssRNA	Filoviridae
PGRMC1	Ebola virus	EBOV	(-)ssRNA	Filoviridae
POM121	Ebola virus	EBOV	(-)ssRNA	Filoviridae
RPS3	Ebola virus	EBOV	(-)ssRNA	Filoviridae
TUFM	Ebola virus	EBOV	(-)ssRNA	Filoviridae
ADNP	Ebola virus	EBOV	(-)ssRNA	Filoviridae
H2AW	Ebola virus	EBOV	(-)ssRNA	Filoviridae
RCC2	Ebola virus	EBOV	(-)ssRNA	Filoviridae
TMX1	Ebola virus	EBOV	(-)ssRNA	Filoviridae
DDB1	Ebola virus	EBOV	(-)ssRNA	Filoviridae
COX5B	Ebola virus	EBOV	(-)ssRNA	Filoviridae
C8orf33	Ebola virus	EBOV	(-)ssRNA	Filoviridae
EEF1A2	Ebola virus	EBOV	(-)ssRNA	Filoviridae
H2BC11	Ebola virus	EBOV	(-)ssRNA	Filoviridae
GTF3C1	Ebola virus	EBOV	(-)ssRNA	Filoviridae
H1-0	Ebola virus	EBOV	(-)ssRNA	Filoviridae
GTPBP4	Ebola virus	EBOV	(-)ssRNA	Filoviridae
SEC24C	Ebola virus	EBOV	(-)ssRNA	Filoviridae
EMD	Ebola virus	EBOV	(-)ssRNA	Filoviridae
TP53	Ebola virus	EBOV	(-)ssRNA	Filoviridae
PARP10	Ebola virus	EBOV	(-)ssRNA	Filoviridae
MRPS11	Ebola virus	EBOV	(-)ssRNA	Filoviridae
KMT2A	Ebola virus	EBOV	(-)ssRNA	Filoviridae
HNRNPUL1	Ebola virus	EBOV	(-)ssRNA	Filoviridae
DNAJA1	Ebola virus	EBOV	(-)ssRNA	Filoviridae
VDAC2	Ebola virus	EBOV	(-)ssRNA	Filoviridae
CCAR2	Ebola virus	EBOV	(-)ssRNA	Filoviridae
PHGDH	Ebola virus	EBOV	(-)ssRNA	Filoviridae
UQCRH	Ebola virus	EBOV	(-)ssRNA	Filoviridae
POM121C	Ebola virus	EBOV	(-)ssRNA	Filoviridae
HNRNPF	Ebola virus	EBOV	(-)ssRNA	Filoviridae
BAG2	Ebola virus	EBOV	(-)ssRNA	Filoviridae
TCP1	Ebola virus	EBOV	(-)ssRNA	Filoviridae
TCERG1	Ebola virus	EBOV	(-)ssRNA	Filoviridae
ABT1	Ebola virus	EBOV	(-)ssRNA	Filoviridae
H2AC7	Ebola virus	EBOV	(-)ssRNA	Filoviridae
PRKDC	Ebola virus	EBOV	(-)ssRNA	Filoviridae
CGGBP1	Ebola virus	EBOV	(-)ssRNA	Filoviridae
MRPS10	Ebola virus	EBOV	(-)ssRNA	Filoviridae
CD3EAP	Ebola virus	EBOV	(-)ssRNA	Filoviridae
CCT5	Ebola virus	EBOV	(-)ssRNA	Filoviridae
SPTLC1	Ebola virus	EBOV	(-)ssRNA	Filoviridae
KLHL7	Ebola virus	EBOV	(-)ssRNA	Filoviridae
HNRNPH2	Ebola virus	EBOV	(-)ssRNA	Filoviridae
RPS27	Ebola virus	EBOV	(-)ssRNA	Filoviridae
RPS27L	Ebola virus	EBOV	(-)ssRNA	Filoviridae
DYNLL1	Ebola virus	EBOV	(-)ssRNA	Filoviridae
RPN1	Ebola virus	EBOV	(-)ssRNA	Filoviridae
RPS15	Ebola virus	EBOV	(-)ssRNA	Filoviridae
GRN	Ebola virus	EBOV	(-)ssRNA	Filoviridae
H2BC5	Ebola virus	EBOV	(-)ssRNA	Filoviridae
CAD	Ebola virus	EBOV	(-)ssRNA	Filoviridae
LARP1	Ebola virus	EBOV	(-)ssRNA	Filoviridae
KPNA1	Ebola virus	EBOV	(-)ssRNA	Filoviridae
TIMM8A	Ebola virus	EBOV	(-)ssRNA	Filoviridae
AIFM1	Ebola virus	EBOV	(-)ssRNA	Filoviridae
H2AC12	Ebola virus	EBOV	(-)ssRNA	Filoviridae
H2AC14	Ebola virus	EBOV	(-)ssRNA	Filoviridae
TMED10	Ebola virus	EBOV	(-)ssRNA	Filoviridae
PON2	Ebola virus	EBOV	(-)ssRNA	Filoviridae
SSR4	Ebola virus	EBOV	(-)ssRNA	Filoviridae
RIF1	Ebola virus	EBOV	(-)ssRNA	Filoviridae
DHX9	Ebola virus	EBOV	(-)ssRNA	Filoviridae
H2BC3	Ebola virus	EBOV	(-)ssRNA	Filoviridae
USP9X	Ebola virus	EBOV	(-)ssRNA	Filoviridae
H2BC1	Ebola virus	EBOV	(-)ssRNA	Filoviridae
BAZ1B	Ebola virus	EBOV	(-)ssRNA	Filoviridae
RPL12	Ebola virus	EBOV	(-)ssRNA	Filoviridae
MYBBP1A	Ebola virus	EBOV	(-)ssRNA	Filoviridae
BLOC1S1	Ebola virus	EBOV	(-)ssRNA	Filoviridae
PCNA	Ebola virus	EBOV	(-)ssRNA	Filoviridae
CPSF3	Ebola virus	EBOV	(-)ssRNA	Filoviridae
RAB11B	Ebola virus	EBOV	(-)ssRNA	Filoviridae
RPL39	Ebola virus	EBOV	(-)ssRNA	Filoviridae
DDX54	Ebola virus	EBOV	(-)ssRNA	Filoviridae
XRN2	Ebola virus	EBOV	(-)ssRNA	Filoviridae
S100P	Ebola virus	EBOV	(-)ssRNA	Filoviridae
H2BC15	Ebola virus	EBOV	(-)ssRNA	Filoviridae
RBBP4	Ebola virus	EBOV	(-)ssRNA	Filoviridae
BSG	Ebola virus	EBOV	(-)ssRNA	Filoviridae
MRM3	Ebola virus	EBOV	(-)ssRNA	Filoviridae
MYO5A	Ebola virus	EBOV	(-)ssRNA	Filoviridae
SMARCE1	Ebola virus	EBOV	(-)ssRNA	Filoviridae
EXOSC10	Ebola virus	EBOV	(-)ssRNA	Filoviridae
HNRNPH1	Ebola virus	EBOV	(-)ssRNA	Filoviridae
GATAD2A	Ebola virus	EBOV	(-)ssRNA	Filoviridae
NEDD4	Ebola virus	EBOV	(-)ssRNA	Filoviridae
CANX	Ebola virus	EBOV	(-)ssRNA	Filoviridae
DDX24	Ebola virus	EBOV	(-)ssRNA	Filoviridae
H2BS1	Ebola virus	EBOV	(-)ssRNA	Filoviridae
TIMM8B	Ebola virus	EBOV	(-)ssRNA	Filoviridae
GRSF1	Ebola virus	EBOV	(-)ssRNA	Filoviridae
GTF3C3	Ebola virus	EBOV	(-)ssRNA	Filoviridae
WTAP	Ebola virus	EBOV	(-)ssRNA	Filoviridae
LGALS8	Ebola virus	EBOV	(-)ssRNA	Filoviridae
CPSF1	Ebola virus	EBOV	(-)ssRNA	Filoviridae
SMARCC2	Ebola virus	EBOV	(-)ssRNA	Filoviridae
PHB2	Ebola virus	EBOV	(-)ssRNA	Filoviridae
GTF3C5	Ebola virus	EBOV	(-)ssRNA	Filoviridae
NAT10	Ebola virus	EBOV	(-)ssRNA	Filoviridae
MYEF2	Ebola virus	EBOV	(-)ssRNA	Filoviridae
REEP5	Ebola virus	EBOV	(-)ssRNA	Filoviridae
WDR33	Ebola virus	EBOV	(-)ssRNA	Filoviridae
RAB7A	Ebola virus	EBOV	(-)ssRNA	Filoviridae
SNRPC	Ebola virus	EBOV	(-)ssRNA	Filoviridae
SAFB	Ebola virus	EBOV	(-)ssRNA	Filoviridae
SLC25A3	Ebola virus	EBOV	(-)ssRNA	Filoviridae
POP1	Ebola virus	EBOV	(-)ssRNA	Filoviridae
NFATC3	Ebola virus	EBOV	(-)ssRNA	Filoviridae
MYO5C	Ebola virus	EBOV	(-)ssRNA	Filoviridae
C7orf50	Ebola virus	EBOV	(-)ssRNA	Filoviridae
BORCS7	Ebola virus	EBOV	(-)ssRNA	Filoviridae
FAM120A	Ebola virus	EBOV	(-)ssRNA	Filoviridae
RFC4	Ebola virus	EBOV	(-)ssRNA	Filoviridae
DDX18	Ebola virus	EBOV	(-)ssRNA	Filoviridae
MATR3	Ebola virus	EBOV	(-)ssRNA	Filoviridae
AP1M1	Ebola virus	EBOV	(-)ssRNA	Filoviridae
H2BC18	Ebola virus	EBOV	(-)ssRNA	Filoviridae
H2BC21	Ebola virus	EBOV	(-)ssRNA	Filoviridae
LMNB1	Ebola virus	EBOV	(-)ssRNA	Filoviridae
GNL2	Ebola virus	EBOV	(-)ssRNA	Filoviridae
LYZ	Ebola virus	EBOV	(-)ssRNA	Filoviridae
HNRNPU	Ebola virus	EBOV	(-)ssRNA	Filoviridae
HSPA1A	Ebola virus	EBOV	(-)ssRNA	Filoviridae
H3-5	Ebola virus	EBOV	(-)ssRNA	Filoviridae
RRP1B	Ebola virus	EBOV	(-)ssRNA	Filoviridae
RPS17	Ebola virus	EBOV	(-)ssRNA	Filoviridae
FAF2	Ebola virus	EBOV	(-)ssRNA	Filoviridae
FUS	Ebola virus	EBOV	(-)ssRNA	Filoviridae
RBBP7	Ebola virus	EBOV	(-)ssRNA	Filoviridae
H2AJ	Ebola virus	EBOV	(-)ssRNA	Filoviridae
GNL3	Ebola virus	EBOV	(-)ssRNA	Filoviridae
RBM4	Ebola virus	EBOV	(-)ssRNA	Filoviridae
RBMX	Ebola virus	EBOV	(-)ssRNA	Filoviridae
FUT8	Ebola virus	EBOV	(-)ssRNA	Filoviridae
PDCD2	Ebola virus	EBOV	(-)ssRNA	Filoviridae
ZC3H18	Ebola virus	EBOV	(-)ssRNA	Filoviridae
PHB	Ebola virus	EBOV	(-)ssRNA	Filoviridae
PRKCSH	Ebola virus	EBOV	(-)ssRNA	Filoviridae
SPOP	Ebola virus	EBOV	(-)ssRNA	Filoviridae
RBM8A	Ebola virus	EBOV	(-)ssRNA	Filoviridae
KPNA5	Ebola virus	EBOV	(-)ssRNA	Filoviridae
H2AC6	Ebola virus	EBOV	(-)ssRNA	Filoviridae
RPL22	Ebola virus	EBOV	(-)ssRNA	Filoviridae
SRSF10	Ebola virus	EBOV	(-)ssRNA	Filoviridae
SLC1A5	Ebola virus	EBOV	(-)ssRNA	Filoviridae
EXOSC6	Ebola virus	EBOV	(-)ssRNA	Filoviridae
NEFH	Ebola virus	EBOV	(-)ssRNA	Filoviridae
HSP90AB1	Ebola virus	EBOV	(-)ssRNA	Filoviridae
PTBP1	Ebola virus	EBOV	(-)ssRNA	Filoviridae
SLC3A2	Ebola virus	EBOV	(-)ssRNA	Filoviridae
RBM34	Ebola virus	EBOV	(-)ssRNA	Filoviridae
BYSL	Ebola virus	EBOV	(-)ssRNA	Filoviridae
CDC5L	Ebola virus	EBOV	(-)ssRNA	Filoviridae
GADD45GIP1	Ebola virus	EBOV	(-)ssRNA	Filoviridae
YME1L1	Ebola virus	EBOV	(-)ssRNA	Filoviridae
GART	Ebola virus	EBOV	(-)ssRNA	Filoviridae
FIP1L1	Ebola virus	EBOV	(-)ssRNA	Filoviridae
H2AC20	Ebola virus	EBOV	(-)ssRNA	Filoviridae
SAFB2	Ebola virus	EBOV	(-)ssRNA	Filoviridae
IKBKE	Ebola virus	EBOV	(-)ssRNA	Filoviridae
MBD3	Ebola virus	EBOV	(-)ssRNA	Filoviridae
H2BC12	Ebola virus	EBOV	(-)ssRNA	Filoviridae
ATXN10	Ebola virus	EBOV	(-)ssRNA	Filoviridae
PNN	Ebola virus	EBOV	(-)ssRNA	Filoviridae
EXOSC1	Ebola virus	EBOV	(-)ssRNA	Filoviridae
HSPA8	Ebola virus	EBOV	(-)ssRNA	Filoviridae
RPS20	Ebola virus	EBOV	(-)ssRNA	Filoviridae
SLC25A5	Ebola virus	EBOV	(-)ssRNA	Filoviridae
SRPRB	Ebola virus	EBOV	(-)ssRNA	Filoviridae
REEP6	Ebola virus	EBOV	(-)ssRNA	Filoviridae
PSEN2	Ebola virus	EBOV	(-)ssRNA	Filoviridae
FTSJ3	Ebola virus	EBOV	(-)ssRNA	Filoviridae
OLA1	Ebola virus	EBOV	(-)ssRNA	Filoviridae
TBL2	Ebola virus	EBOV	(-)ssRNA	Filoviridae
DLAT	Ebola virus	EBOV	(-)ssRNA	Filoviridae
HNRNPL	Ebola virus	EBOV	(-)ssRNA	Filoviridae
ZC3H4	Ebola virus	EBOV	(-)ssRNA	Filoviridae
SMARCA4	Ebola virus	EBOV	(-)ssRNA	Filoviridae
C17orf49	Ebola virus	EBOV	(-)ssRNA	Filoviridae
PTCD3	Ebola virus	EBOV	(-)ssRNA	Filoviridae
SSR3	Ebola virus	EBOV	(-)ssRNA	Filoviridae
CPSF2	Ebola virus	EBOV	(-)ssRNA	Filoviridae
H2BC17	Ebola virus	EBOV	(-)ssRNA	Filoviridae
SDF2L1	Ebola virus	EBOV	(-)ssRNA	Filoviridae
TSR1	Ebola virus	EBOV	(-)ssRNA	Filoviridae
H1-4	Ebola virus	EBOV	(-)ssRNA	Filoviridae
CLGN	Ebola virus	EBOV	(-)ssRNA	Filoviridae
KPNA6	Ebola virus	EBOV	(-)ssRNA	Filoviridae
PIP	Ebola virus	EBOV	(-)ssRNA	Filoviridae
HNRNPK	Ebola virus	EBOV	(-)ssRNA	Filoviridae
YTHDC1	Ebola virus	EBOV	(-)ssRNA	Filoviridae
EEF1A1	Ebola virus	EBOV	(-)ssRNA	Filoviridae
H2BC13	Ebola virus	EBOV	(-)ssRNA	Filoviridae
CALM1	Ebola virus	EBOV	(-)ssRNA	Filoviridae
MRPS21	Ebola virus	EBOV	(-)ssRNA	Filoviridae
ILF3	Ebola virus	EBOV	(-)ssRNA	Filoviridae
NCL	Ebola virus	EBOV	(-)ssRNA	Filoviridae
MAP7D1	Ebola virus	EBOV	(-)ssRNA	Filoviridae
TRMT1L	Ebola virus	EBOV	(-)ssRNA	Filoviridae
RRP9	Ebola virus	EBOV	(-)ssRNA	Filoviridae
SART3	Ebola virus	EBOV	(-)ssRNA	Filoviridae
MRPS35	Ebola virus	EBOV	(-)ssRNA	Filoviridae
NPM3	Ebola virus	EBOV	(-)ssRNA	Filoviridae
HAX1	Ebola virus	EBOV	(-)ssRNA	Filoviridae
IARS1	Ebola virus	EBOV	(-)ssRNA	Filoviridae
NPC1	Ebola virus	EBOV	(-)ssRNA	Filoviridae
MRPS22	Ebola virus	EBOV	(-)ssRNA	Filoviridae
NCOA5	Ebola virus	EBOV	(-)ssRNA	Filoviridae
RNPS1	Ebola virus	EBOV	(-)ssRNA	Filoviridae
PEG10	Ebola virus	EBOV	(-)ssRNA	Filoviridae
RBBP6	Ebola virus	EBOV	(-)ssRNA	Filoviridae
LLPH	Ebola virus	EBOV	(-)ssRNA	Filoviridae
AIMP1	Ebola virus	EBOV	(-)ssRNA	Filoviridae
EXOSC5	Ebola virus	EBOV	(-)ssRNA	Filoviridae
CASC3	Ebola virus	EBOV	(-)ssRNA	Filoviridae
TBK1	Ebola virus	EBOV	(-)ssRNA	Filoviridae
NUP153	Ebola virus	EBOV	(-)ssRNA	Filoviridae
PPP2R2A	Ebola virus	EBOV	(-)ssRNA	Filoviridae
ZNF326	Ebola virus	EBOV	(-)ssRNA	Filoviridae
ZNF629	Ebola virus	EBOV	(-)ssRNA	Filoviridae
PRKRA	Ebola virus	EBOV	(-)ssRNA	Filoviridae
PWP1	Ebola virus	EBOV	(-)ssRNA	Filoviridae
FBL	Ebola virus	EBOV	(-)ssRNA	Filoviridae
GPRASP1	Ebola virus	EBOV	(-)ssRNA	Filoviridae
MRPS5	Ebola virus	EBOV	(-)ssRNA	Filoviridae
TUBA1C	Ebola virus	EBOV	(-)ssRNA	Filoviridae
MRPS23	Ebola virus	EBOV	(-)ssRNA	Filoviridae
POLR1A	Ebola virus	EBOV	(-)ssRNA	Filoviridae
KPNB1	Ebola virus	EBOV	(-)ssRNA	Filoviridae
LGALS3	Ebola virus	EBOV	(-)ssRNA	Filoviridae
RPS29	Ebola virus	EBOV	(-)ssRNA	Filoviridae
TUBA1A	Ebola virus	EBOV	(-)ssRNA	Filoviridae
VDAC1	Ebola virus	EBOV	(-)ssRNA	Filoviridae
LGALS1	Ebola virus	EBOV	(-)ssRNA	Filoviridae
MRPS31	Ebola virus	EBOV	(-)ssRNA	Filoviridae
H3-4	Ebola virus	EBOV	(-)ssRNA	Filoviridae
ANP32B	Ebola virus	EBOV	(-)ssRNA	Filoviridae
ZNF512	Ebola virus	EBOV	(-)ssRNA	Filoviridae
ANP32E	Ebola virus	EBOV	(-)ssRNA	Filoviridae
NKRF	Ebola virus	EBOV	(-)ssRNA	Filoviridae
MIB2	Ebola virus	EBOV	(-)ssRNA	Filoviridae
QKI	Ebola virus	EBOV	(-)ssRNA	Filoviridae
SPATS2	Ebola virus	EBOV	(-)ssRNA	Filoviridae
PGAM5	Ebola virus	EBOV	(-)ssRNA	Filoviridae
GNB2	Ebola virus	EBOV	(-)ssRNA	Filoviridae
MRPS9	Ebola virus	EBOV	(-)ssRNA	Filoviridae
H2BC14	Ebola virus	EBOV	(-)ssRNA	Filoviridae
GANAB	Ebola virus	EBOV	(-)ssRNA	Filoviridae
ATP2A2	Ebola virus	EBOV	(-)ssRNA	Filoviridae
ATP1A1	Ebola virus	EBOV	(-)ssRNA	Filoviridae
ANP32A	Ebola virus	EBOV	(-)ssRNA	Filoviridae
LZTS2	Epstein-Barr virus	EBV	dsDNA	Herpesviridae
SPTLC1	Epstein-Barr virus	EBV	dsDNA	Herpesviridae
SPNS1	Epstein-Barr virus	EBV	dsDNA	Herpesviridae
VAT1	Epstein-Barr virus	EBV	dsDNA	Herpesviridae
ATRX	Epstein-Barr virus	EBV	dsDNA	Herpesviridae
ZW10	Epstein-Barr virus	EBV	dsDNA	Herpesviridae
LTBP4	Epstein-Barr virus	EBV	dsDNA	Herpesviridae
S100A16	Epstein-Barr virus	EBV	dsDNA	Herpesviridae
RRAS	Epstein-Barr virus	EBV	dsDNA	Herpesviridae
RCN3	Epstein-Barr virus	EBV	dsDNA	Herpesviridae
ESYT2	Epstein-Barr virus	EBV	dsDNA	Herpesviridae
SLC3A2	Epstein-Barr virus	EBV	dsDNA	Herpesviridae
PARP1	Epstein-Barr virus	EBV	dsDNA	Herpesviridae
ANK3	Epstein-Barr virus	EBV	dsDNA	Herpesviridae
CREB3	Epstein-Barr virus	EBV	dsDNA	Herpesviridae
AP2A2	Epstein-Barr virus	EBV	dsDNA	Herpesviridae
ESYT1	Epstein-Barr virus	EBV	dsDNA	Herpesviridae
RRBP1	Epstein-Barr virus	EBV	dsDNA	Herpesviridae
PDGFRB	Epstein-Barr virus	EBV	dsDNA	Herpesviridae
TM9SF3	Epstein-Barr virus	EBV	dsDNA	Herpesviridae
TMEM161A	Epstein-Barr virus	EBV	dsDNA	Herpesviridae
MTCL1	Epstein-Barr virus	EBV	dsDNA	Herpesviridae
DNAJC7	Epstein-Barr virus	EBV	dsDNA	Herpesviridae
XPO7	Epstein-Barr virus	EBV	dsDNA	Herpesviridae
ABLIM3	Epstein-Barr virus	EBV	dsDNA	Herpesviridae
MRPS2	Epstein-Barr virus	EBV	dsDNA	Herpesviridae
TARS2	Epstein-Barr virus	EBV	dsDNA	Herpesviridae
STX12	Epstein-Barr virus	EBV	dsDNA	Herpesviridae
SQSTM1	Epstein-Barr virus	EBV	dsDNA	Herpesviridae
PTTG1IP	Epstein-Barr virus	EBV	dsDNA	Herpesviridae
VWA8	Epstein-Barr virus	EBV	dsDNA	Herpesviridae
WLS	Epstein-Barr virus	EBV	dsDNA	Herpesviridae
PTPRK	Epstein-Barr virus	EBV	dsDNA	Herpesviridae
TMEM159	Epstein-Barr virus	EBV	dsDNA	Herpesviridae
MAP2K3	Epstein-Barr virus	EBV	dsDNA	Herpesviridae
NPM1	Epstein-Barr virus	EBV	dsDNA	Herpesviridae
SEC22B	Epstein-Barr virus	EBV	dsDNA	Herpesviridae
MRPS14	Epstein-Barr virus	EBV	dsDNA	Herpesviridae
PRAF2	Epstein-Barr virus	EBV	dsDNA	Herpesviridae
RPS27L	Epstein-Barr virus	EBV	dsDNA	Herpesviridae
NEDD8	Epstein-Barr virus	EBV	dsDNA	Herpesviridae
RNF167	Epstein-Barr virus	EBV	dsDNA	Herpesviridae
RPN2	Epstein-Barr virus	EBV	dsDNA	Herpesviridae
EVA1B	Epstein-Barr virus	EBV	dsDNA	Herpesviridae
F2R	Epstein-Barr virus	EBV	dsDNA	Herpesviridae
FAS	Epstein-Barr virus	EBV	dsDNA	Herpesviridae
XPO1	Epstein-Barr virus	EBV	dsDNA	Herpesviridae
USP10	Epstein-Barr virus	EBV	dsDNA	Herpesviridae
PLPP6	Epstein-Barr virus	EBV	dsDNA	Herpesviridae
MOV10	Epstein-Barr virus	EBV	dsDNA	Herpesviridae
RHOT2	Epstein-Barr virus	EBV	dsDNA	Herpesviridae
TFRC	Epstein-Barr virus	EBV	dsDNA	Herpesviridae
VAPA	Epstein-Barr virus	EBV	dsDNA	Herpesviridae
SSRP1	Epstein-Barr virus	EBV	dsDNA	Herpesviridae
TM9SF2	Epstein-Barr virus	EBV	dsDNA	Herpesviridae
SNX17	Epstein-Barr virus	EBV	dsDNA	Herpesviridae
SCCPDH	Epstein-Barr virus	EBV	dsDNA	Herpesviridae
TMEM165	Epstein-Barr virus	EBV	dsDNA	Herpesviridae
MAP7D1	Epstein-Barr virus	EBV	dsDNA	Herpesviridae
MARCKS	Epstein-Barr virus	EBV	dsDNA	Herpesviridae
CTBP1	Epstein-Barr virus	EBV	dsDNA	Herpesviridae
VCP	Epstein-Barr virus	EBV	dsDNA	Herpesviridae
PLXDC2	Epstein-Barr virus	EBV	dsDNA	Herpesviridae
SCAMP3	Epstein-Barr virus	EBV	dsDNA	Herpesviridae
MTUS2	Epstein-Barr virus	EBV	dsDNA	Herpesviridae
TGFBR2	Epstein-Barr virus	EBV	dsDNA	Herpesviridae
STX10	Epstein-Barr virus	EBV	dsDNA	Herpesviridae
PREB	Epstein-Barr virus	EBV	dsDNA	Herpesviridae
HNRNPA2B1	Epstein-Barr virus	EBV	dsDNA	Herpesviridae
HNRNPAB	Epstein-Barr virus	EBV	dsDNA	Herpesviridae
SNAP23	Epstein-Barr virus	EBV	dsDNA	Herpesviridae
PSMD11	Epstein-Barr virus	EBV	dsDNA	Herpesviridae
RAB32	Epstein-Barr virus	EBV	dsDNA	Herpesviridae
RAB34	Epstein-Barr virus	EBV	dsDNA	Herpesviridae
SEC61A1	Epstein-Barr virus	EBV	dsDNA	Herpesviridae
SEC61B	Epstein-Barr virus	EBV	dsDNA	Herpesviridae
SEC63	Epstein-Barr virus	EBV	dsDNA	Herpesviridae
TAP2	Epstein-Barr virus	EBV	dsDNA	Herpesviridae
NAALADL2	Epstein-Barr virus	EBV	dsDNA	Herpesviridae
MYO1C	Epstein-Barr virus	EBV	dsDNA	Herpesviridae
RHOT1	Epstein-Barr virus	EBV	dsDNA	Herpesviridae
ERGIC3	Epstein-Barr virus	EBV	dsDNA	Herpesviridae
ERLIN2	Epstein-Barr virus	EBV	dsDNA	Herpesviridae
PTK7	Epstein-Barr virus	EBV	dsDNA	Herpesviridae
RRAS2	Epstein-Barr virus	EBV	dsDNA	Herpesviridae
PTPRF	Epstein-Barr virus	EBV	dsDNA	Herpesviridae
PSMD4	Epstein-Barr virus	EBV	dsDNA	Herpesviridae
UBE2M	Epstein-Barr virus	EBV	dsDNA	Herpesviridae
USP7	Epstein-Barr virus	EBV	dsDNA	Herpesviridae
PEX5	Epstein-Barr virus	EBV	dsDNA	Herpesviridae
MOGS	Epstein-Barr virus	EBV	dsDNA	Herpesviridae
SLAIN2	Epstein-Barr virus	EBV	dsDNA	Herpesviridae
OBI1	Epstein-Barr virus	EBV	dsDNA	Herpesviridae
TM9SF1	Epstein-Barr virus	EBV	dsDNA	Herpesviridae
IPO5	Epstein-Barr virus	EBV	dsDNA	Herpesviridae
JAK1	Epstein-Barr virus	EBV	dsDNA	Herpesviridae
KLHL12	Epstein-Barr virus	EBV	dsDNA	Herpesviridae
KPNB1	Epstein-Barr virus	EBV	dsDNA	Herpesviridae
SCO2	Epstein-Barr virus	EBV	dsDNA	Herpesviridae
TMEM175	Epstein-Barr virus	EBV	dsDNA	Herpesviridae
COPE	Epstein-Barr virus	EBV	dsDNA	Herpesviridae
MARS1	Epstein-Barr virus	EBV	dsDNA	Herpesviridae
MBOAT7	Epstein-Barr virus	EBV	dsDNA	Herpesviridae
MDFI	Epstein-Barr virus	EBV	dsDNA	Herpesviridae
MID2	Epstein-Barr virus	EBV	dsDNA	Herpesviridae
SLC12A4	Epstein-Barr virus	EBV	dsDNA	Herpesviridae
NOTCH1	Epstein-Barr virus	EBV	dsDNA	Herpesviridae
SLC2A1	Epstein-Barr virus	EBV	dsDNA	Herpesviridae
TRPV2	Epstein-Barr virus	EBV	dsDNA	Herpesviridae
UBE2I	Epstein-Barr virus	EBV	dsDNA	Herpesviridae
UNC93B1	Epstein-Barr virus	EBV	dsDNA	Herpesviridae
VKORC1	Epstein-Barr virus	EBV	dsDNA	Herpesviridae
TRIM25	Epstein-Barr virus	EBV	dsDNA	Herpesviridae
WWOX	Epstein-Barr virus	EBV	dsDNA	Herpesviridae
UBE2A	Epstein-Barr virus	EBV	dsDNA	Herpesviridae
C1orf94	Epstein-Barr virus	EBV	dsDNA	Herpesviridae
NFKB1	Epstein-Barr virus	EBV	dsDNA	Herpesviridae
PSMA3	Epstein-Barr virus	EBV	dsDNA	Herpesviridae
TNPO1	Epstein-Barr virus	EBV	dsDNA	Herpesviridae
ACTN1	Epstein-Barr virus	EBV	dsDNA	Herpesviridae
ERGIC1	Epstein-Barr virus	EBV	dsDNA	Herpesviridae
BAG6	Epstein-Barr virus	EBV	dsDNA	Herpesviridae
TFG	Epstein-Barr virus	EBV	dsDNA	Herpesviridae
SEC62	Epstein-Barr virus	EBV	dsDNA	Herpesviridae
ILF3	Epstein-Barr virus	EBV	dsDNA	Herpesviridae
IQGAP2	Epstein-Barr virus	EBV	dsDNA	Herpesviridae
KHDRBS1	Epstein-Barr virus	EBV	dsDNA	Herpesviridae
TBC1D15	Epstein-Barr virus	EBV	dsDNA	Herpesviridae
S1PR3	Epstein-Barr virus	EBV	dsDNA	Herpesviridae
SCAMP2	Epstein-Barr virus	EBV	dsDNA	Herpesviridae
SAYSD1	Epstein-Barr virus	EBV	dsDNA	Herpesviridae
NIPSNAP1	Epstein-Barr virus	EBV	dsDNA	Herpesviridae
NIPSNAP2	Epstein-Barr virus	EBV	dsDNA	Herpesviridae
NME1	Epstein-Barr virus	EBV	dsDNA	Herpesviridae
LAMB2	Epstein-Barr virus	EBV	dsDNA	Herpesviridae
CD74	Epstein-Barr virus	EBV	dsDNA	Herpesviridae
ABCC1	Epstein-Barr virus	EBV	dsDNA	Herpesviridae
ABHD12	Epstein-Barr virus	EBV	dsDNA	Herpesviridae
PCBP1	Epstein-Barr virus	EBV	dsDNA	Herpesviridae
ADAM9	Epstein-Barr virus	EBV	dsDNA	Herpesviridae
TMEM30A	Epstein-Barr virus	EBV	dsDNA	Herpesviridae
ALG5	Epstein-Barr virus	EBV	dsDNA	Herpesviridae
RFX6	Epstein-Barr virus	EBV	dsDNA	Herpesviridae
UPRT	Epstein-Barr virus	EBV	dsDNA	Herpesviridae
ELF2	Epstein-Barr virus	EBV	dsDNA	Herpesviridae
SDCBP2	Epstein-Barr virus	EBV	dsDNA	Herpesviridae
TP53I11	Epstein-Barr virus	EBV	dsDNA	Herpesviridae
TRAM1	Epstein-Barr virus	EBV	dsDNA	Herpesviridae
NOTCH4	Epstein-Barr virus	EBV	dsDNA	Herpesviridae
SFN	Epstein-Barr virus	EBV	dsDNA	Herpesviridae
TRAF2	Epstein-Barr virus	EBV	dsDNA	Herpesviridae
PVR	Epstein-Barr virus	EBV	dsDNA	Herpesviridae
QPCTL	Epstein-Barr virus	EBV	dsDNA	Herpesviridae
RAB18	Epstein-Barr virus	EBV	dsDNA	Herpesviridae
OSMR	Epstein-Barr virus	EBV	dsDNA	Herpesviridae
RIMBP3	Epstein-Barr virus	EBV	dsDNA	Herpesviridae
PPP6R3	Epstein-Barr virus	EBV	dsDNA	Herpesviridae
KDSR	Epstein-Barr virus	EBV	dsDNA	Herpesviridae
POGZ	Epstein-Barr virus	EBV	dsDNA	Herpesviridae
LAMTOR1	Epstein-Barr virus	EBV	dsDNA	Herpesviridae
RARA	Epstein-Barr virus	EBV	dsDNA	Herpesviridae
PLOD2	Epstein-Barr virus	EBV	dsDNA	Herpesviridae
PPFIA1	Epstein-Barr virus	EBV	dsDNA	Herpesviridae
PSMC1	Epstein-Barr virus	EBV	dsDNA	Herpesviridae
PSMC4	Epstein-Barr virus	EBV	dsDNA	Herpesviridae
PSMD1	Epstein-Barr virus	EBV	dsDNA	Herpesviridae
CD44	Epstein-Barr virus	EBV	dsDNA	Herpesviridae
RNF11	Epstein-Barr virus	EBV	dsDNA	Herpesviridae
MCCC2	Epstein-Barr virus	EBV	dsDNA	Herpesviridae
MLF2	Epstein-Barr virus	EBV	dsDNA	Herpesviridae
TRAF1	Epstein-Barr virus	EBV	dsDNA	Herpesviridae
RPS6KA3	Epstein-Barr virus	EBV	dsDNA	Herpesviridae
SDF4	Epstein-Barr virus	EBV	dsDNA	Herpesviridae
KIFC3	Epstein-Barr virus	EBV	dsDNA	Herpesviridae
SCAMP4	Epstein-Barr virus	EBV	dsDNA	Herpesviridae
SCARB2	Epstein-Barr virus	EBV	dsDNA	Herpesviridae
CNTNAP1	Epstein-Barr virus	EBV	dsDNA	Herpesviridae
COA7	Epstein-Barr virus	EBV	dsDNA	Herpesviridae
SCFD1	Epstein-Barr virus	EBV	dsDNA	Herpesviridae
COPB1	Epstein-Barr virus	EBV	dsDNA	Herpesviridae
AGK	Epstein-Barr virus	EBV	dsDNA	Herpesviridae
TMEM200A	Epstein-Barr virus	EBV	dsDNA	Herpesviridae
CPT1A	Epstein-Barr virus	EBV	dsDNA	Herpesviridae
PSMA6	Epstein-Barr virus	EBV	dsDNA	Herpesviridae
CRIM1	Epstein-Barr virus	EBV	dsDNA	Herpesviridae
WWP2	Epstein-Barr virus	EBV	dsDNA	Herpesviridae
YWHAH	Epstein-Barr virus	EBV	dsDNA	Herpesviridae
GFPT1	Epstein-Barr virus	EBV	dsDNA	Herpesviridae
HNRNPA1	Epstein-Barr virus	EBV	dsDNA	Herpesviridae
ADAR	Epstein-Barr virus	EBV	dsDNA	Herpesviridae
SLC30A7	Epstein-Barr virus	EBV	dsDNA	Herpesviridae
SLC30A9	Epstein-Barr virus	EBV	dsDNA	Herpesviridae
SLC35F6	Epstein-Barr virus	EBV	dsDNA	Herpesviridae
ATP13A1	Epstein-Barr virus	EBV	dsDNA	Herpesviridae
SPTLC2	Epstein-Barr virus	EBV	dsDNA	Herpesviridae
PSMD14	Epstein-Barr virus	EBV	dsDNA	Herpesviridae
EGFR	Epstein-Barr virus	EBV	dsDNA	Herpesviridae
PSMD7	Epstein-Barr virus	EBV	dsDNA	Herpesviridae
KIRREL1	Epstein-Barr virus	EBV	dsDNA	Herpesviridae
HSPA8	Epstein-Barr virus	EBV	dsDNA	Herpesviridae
RFTN1	Epstein-Barr virus	EBV	dsDNA	Herpesviridae
STOML2	Epstein-Barr virus	EBV	dsDNA	Herpesviridae
STT3A	Epstein-Barr virus	EBV	dsDNA	Herpesviridae
DDB1	Epstein-Barr virus	EBV	dsDNA	Herpesviridae
DHX30	Epstein-Barr virus	EBV	dsDNA	Herpesviridae
SLF2	Epstein-Barr virus	EBV	dsDNA	Herpesviridae
SORT1	Epstein-Barr virus	EBV	dsDNA	Herpesviridae
PLEKHA5	Epstein-Barr virus	EBV	dsDNA	Herpesviridae
RSU1	Epstein-Barr virus	EBV	dsDNA	Herpesviridae
FBLN2	Epstein-Barr virus	EBV	dsDNA	Herpesviridae
SACM1L	Epstein-Barr virus	EBV	dsDNA	Herpesviridae
TBC1D17	Epstein-Barr virus	EBV	dsDNA	Herpesviridae
TBL2	Epstein-Barr virus	EBV	dsDNA	Herpesviridae
SPAG5	Epstein-Barr virus	EBV	dsDNA	Herpesviridae
MCM4	Epstein-Barr virus	EBV	dsDNA	Herpesviridae
HNRNPK	Epstein-Barr virus	EBV	dsDNA	Herpesviridae
INF2	Epstein-Barr virus	EBV	dsDNA	Herpesviridae
NONO	Epstein-Barr virus	EBV	dsDNA	Herpesviridae
GNS	Epstein-Barr virus	EBV	dsDNA	Herpesviridae
P4HA1	Epstein-Barr virus	EBV	dsDNA	Herpesviridae
PCBP2	Epstein-Barr virus	EBV	dsDNA	Herpesviridae
PCCA	Epstein-Barr virus	EBV	dsDNA	Herpesviridae
TMPO	Epstein-Barr virus	EBV	dsDNA	Herpesviridae
TMX1	Epstein-Barr virus	EBV	dsDNA	Herpesviridae
TMX3	Epstein-Barr virus	EBV	dsDNA	Herpesviridae
TNFRSF10B	Epstein-Barr virus	EBV	dsDNA	Herpesviridae
PSMD2	Epstein-Barr virus	EBV	dsDNA	Herpesviridae
PTBP1	Epstein-Barr virus	EBV	dsDNA	Herpesviridae
PYCR2	Epstein-Barr virus	EBV	dsDNA	Herpesviridae
QARS1	Epstein-Barr virus	EBV	dsDNA	Herpesviridae
RAD50	Epstein-Barr virus	EBV	dsDNA	Herpesviridae
RBBP4	Epstein-Barr virus	EBV	dsDNA	Herpesviridae
TPR	Epstein-Barr virus	EBV	dsDNA	Herpesviridae
TRAF6	Epstein-Barr virus	EBV	dsDNA	Herpesviridae
UBC	Epstein-Barr virus	EBV	dsDNA	Herpesviridae
SLIT3	Epstein-Barr virus	EBV	dsDNA	Herpesviridae
IPO9	Epstein-Barr virus	EBV	dsDNA	Herpesviridae
RPL11	Epstein-Barr virus	EBV	dsDNA	Herpesviridae
RCN2	Epstein-Barr virus	EBV	dsDNA	Herpesviridae
PRMT1	Epstein-Barr virus	EBV	dsDNA	Herpesviridae
RPL17	Epstein-Barr virus	EBV	dsDNA	Herpesviridae
RPL18	Epstein-Barr virus	EBV	dsDNA	Herpesviridae
RXRA	Epstein-Barr virus	EBV	dsDNA	Herpesviridae
RNH1	Epstein-Barr virus	EBV	dsDNA	Herpesviridae
YWHAB	Epstein-Barr virus	EBV	dsDNA	Herpesviridae
UBN1	Epstein-Barr virus	EBV	dsDNA	Herpesviridae
CASKIN2	Epstein-Barr virus	EBV	dsDNA	Herpesviridae
STUB1	Epstein-Barr virus	EBV	dsDNA	Herpesviridae
LDHB	Epstein-Barr virus	EBV	dsDNA	Herpesviridae
TGFBI	Epstein-Barr virus	EBV	dsDNA	Herpesviridae
HTATSF1	Epstein-Barr virus	EBV	dsDNA	Herpesviridae
TFIP11	Epstein-Barr virus	EBV	dsDNA	Herpesviridae
TRIM27	Epstein-Barr virus	EBV	dsDNA	Herpesviridae
TECR	Epstein-Barr virus	EBV	dsDNA	Herpesviridae
ZBED1	Epstein-Barr virus	EBV	dsDNA	Herpesviridae
CCHCR1	Epstein-Barr virus	EBV	dsDNA	Herpesviridae
AKAP11	Epstein-Barr virus	EBV	dsDNA	Herpesviridae
MARCO	Epstein-Barr virus	EBV	dsDNA	Herpesviridae
NUCB1	Epstein-Barr virus	EBV	dsDNA	Herpesviridae
ACBD3	Epstein-Barr virus	EBV	dsDNA	Herpesviridae
GAPDH	Epstein-Barr virus	EBV	dsDNA	Herpesviridae
NR4A1	Epstein-Barr virus	EBV	dsDNA	Herpesviridae
RPL4	Epstein-Barr virus	EBV	dsDNA	Herpesviridae
TAZ	Epstein-Barr virus	EBV	dsDNA	Herpesviridae
UCKL1	Epstein-Barr virus	EBV	dsDNA	Herpesviridae
FAM168B	Epstein-Barr virus	EBV	dsDNA	Herpesviridae
PKD2	Epstein-Barr virus	EBV	dsDNA	Herpesviridae
PNPLA6	Epstein-Barr virus	EBV	dsDNA	Herpesviridae
LAMB1	Epstein-Barr virus	EBV	dsDNA	Herpesviridae
IFNGR1	Epstein-Barr virus	EBV	dsDNA	Herpesviridae
ITM2C	Epstein-Barr virus	EBV	dsDNA	Herpesviridae
LAPTM4A	Epstein-Barr virus	EBV	dsDNA	Herpesviridae
UBXN11	Epstein-Barr virus	EBV	dsDNA	Herpesviridae
USHBP1	Epstein-Barr virus	EBV	dsDNA	Herpesviridae
VIM	Epstein-Barr virus	EBV	dsDNA	Herpesviridae
NOTCH2	Epstein-Barr virus	EBV	dsDNA	Herpesviridae
OSTM1	Epstein-Barr virus	EBV	dsDNA	Herpesviridae
RAB3IP	Epstein-Barr virus	EBV	dsDNA	Herpesviridae
RPL12	Epstein-Barr virus	EBV	dsDNA	Herpesviridae
RAP1A	Epstein-Barr virus	EBV	dsDNA	Herpesviridae
RDH14	Epstein-Barr virus	EBV	dsDNA	Herpesviridae
PHLDB2	Epstein-Barr virus	EBV	dsDNA	Herpesviridae
CALR	Epstein-Barr virus	EBV	dsDNA	Herpesviridae
CAND1	Epstein-Barr virus	EBV	dsDNA	Herpesviridae
CCT6B	Epstein-Barr virus	EBV	dsDNA	Herpesviridae
CAVIN3	Epstein-Barr virus	EBV	dsDNA	Herpesviridae
FASN	Epstein-Barr virus	EBV	dsDNA	Herpesviridae
IGFBP4	Epstein-Barr virus	EBV	dsDNA	Herpesviridae
CDCP1	Epstein-Barr virus	EBV	dsDNA	Herpesviridae
FZD6	Epstein-Barr virus	EBV	dsDNA	Herpesviridae
TNS3	Epstein-Barr virus	EBV	dsDNA	Herpesviridae
RNF149	Epstein-Barr virus	EBV	dsDNA	Herpesviridae
PRKACB	Epstein-Barr virus	EBV	dsDNA	Herpesviridae
SERPINE2	Epstein-Barr virus	EBV	dsDNA	Herpesviridae
DHX9	Epstein-Barr virus	EBV	dsDNA	Herpesviridae
COL6A2	Epstein-Barr virus	EBV	dsDNA	Herpesviridae
SLC20A1	Epstein-Barr virus	EBV	dsDNA	Herpesviridae
COL6A3	Epstein-Barr virus	EBV	dsDNA	Herpesviridae
SERTAD1	Epstein-Barr virus	EBV	dsDNA	Herpesviridae
SNX3	Epstein-Barr virus	EBV	dsDNA	Herpesviridae
SUSD6	Epstein-Barr virus	EBV	dsDNA	Herpesviridae
SDCBP	Epstein-Barr virus	EBV	dsDNA	Herpesviridae
GCHFR	Epstein-Barr virus	EBV	dsDNA	Herpesviridae
TMEM59	Epstein-Barr virus	EBV	dsDNA	Herpesviridae
TOLLIP	Epstein-Barr virus	EBV	dsDNA	Herpesviridae
VAMP7	Epstein-Barr virus	EBV	dsDNA	Herpesviridae
H1-3	Epstein-Barr virus	EBV	dsDNA	Herpesviridae
H2BC8	Epstein-Barr virus	EBV	dsDNA	Herpesviridae
SLC25A22	Epstein-Barr virus	EBV	dsDNA	Herpesviridae
HLA-DQB1	Epstein-Barr virus	EBV	dsDNA	Herpesviridae
HNRNPA0	Epstein-Barr virus	EBV	dsDNA	Herpesviridae
LYN	Epstein-Barr virus	EBV	dsDNA	Herpesviridae
SRC	Epstein-Barr virus	EBV	dsDNA	Herpesviridae
SYK	Epstein-Barr virus	EBV	dsDNA	Herpesviridae
DHRS7	Epstein-Barr virus	EBV	dsDNA	Herpesviridae
HNRNPD	Epstein-Barr virus	EBV	dsDNA	Herpesviridae
ATP2B1	Epstein-Barr virus	EBV	dsDNA	Herpesviridae
CSTF2	Epstein-Barr virus	EBV	dsDNA	Herpesviridae
CUL1	Epstein-Barr virus	EBV	dsDNA	Herpesviridae
HSPA5	Epstein-Barr virus	EBV	dsDNA	Herpesviridae
ENG	Epstein-Barr virus	EBV	dsDNA	Herpesviridae
COX20	Epstein-Barr virus	EBV	dsDNA	Herpesviridae
CSRP2	Epstein-Barr virus	EBV	dsDNA	Herpesviridae
HSPB1	Epstein-Barr virus	EBV	dsDNA	Herpesviridae
HSPD1	Epstein-Barr virus	EBV	dsDNA	Herpesviridae
IDH3A	Epstein-Barr virus	EBV	dsDNA	Herpesviridae
IDH3B	Epstein-Barr virus	EBV	dsDNA	Herpesviridae
COL6A1	Epstein-Barr virus	EBV	dsDNA	Herpesviridae
COMT	Epstein-Barr virus	EBV	dsDNA	Herpesviridae
MICAL2	Epstein-Barr virus	EBV	dsDNA	Herpesviridae
CLTC	Epstein-Barr virus	EBV	dsDNA	Herpesviridae
DYNC1H1	Epstein-Barr virus	EBV	dsDNA	Herpesviridae
FHL2	Epstein-Barr virus	EBV	dsDNA	Herpesviridae
NCL	Epstein-Barr virus	EBV	dsDNA	Herpesviridae
GOLGA2	Epstein-Barr virus	EBV	dsDNA	Herpesviridae
GPRASP2	Epstein-Barr virus	EBV	dsDNA	Herpesviridae
ZNF350	Epstein-Barr virus	EBV	dsDNA	Herpesviridae
POLB	Epstein-Barr virus	EBV	dsDNA	Herpesviridae
GGT7	Epstein-Barr virus	EBV	dsDNA	Herpesviridae
NUP93	Epstein-Barr virus	EBV	dsDNA	Herpesviridae
GLIPR1	Epstein-Barr virus	EBV	dsDNA	Herpesviridae
RIPK3	Epstein-Barr virus	EBV	dsDNA	Herpesviridae
NUP107	Epstein-Barr virus	EBV	dsDNA	Herpesviridae
PCCB	Epstein-Barr virus	EBV	dsDNA	Herpesviridae
PHB2	Epstein-Barr virus	EBV	dsDNA	Herpesviridae
PRPF8	Epstein-Barr virus	EBV	dsDNA	Herpesviridae
PSMB6	Epstein-Barr virus	EBV	dsDNA	Herpesviridae
PPP1CA	Epstein-Barr virus	EBV	dsDNA	Herpesviridae
RAD18	Epstein-Barr virus	EBV	dsDNA	Herpesviridae
RANGAP1	Epstein-Barr virus	EBV	dsDNA	Herpesviridae
RBM14	Epstein-Barr virus	EBV	dsDNA	Herpesviridae
SMARCA5	Epstein-Barr virus	EBV	dsDNA	Herpesviridae
PTMA	Epstein-Barr virus	EBV	dsDNA	Herpesviridae
LMNB1	Epstein-Barr virus	EBV	dsDNA	Herpesviridae
VAMP5	Epstein-Barr virus	EBV	dsDNA	Herpesviridae
SH3GLB2	Epstein-Barr virus	EBV	dsDNA	Herpesviridae
ESRRG	Epstein-Barr virus	EBV	dsDNA	Herpesviridae
RFC3	Epstein-Barr virus	EBV	dsDNA	Herpesviridae
ISG15	Epstein-Barr virus	EBV	dsDNA	Herpesviridae
ITGB1	Epstein-Barr virus	EBV	dsDNA	Herpesviridae
PNMA1	Epstein-Barr virus	EBV	dsDNA	Herpesviridae
PPM1B	Epstein-Barr virus	EBV	dsDNA	Herpesviridae
RPL13	Epstein-Barr virus	EBV	dsDNA	Herpesviridae
LRP10	Epstein-Barr virus	EBV	dsDNA	Herpesviridae
LRPPRC	Epstein-Barr virus	EBV	dsDNA	Herpesviridae
RPL13A	Epstein-Barr virus	EBV	dsDNA	Herpesviridae
RPS27	Epstein-Barr virus	EBV	dsDNA	Herpesviridae
RTN4	Epstein-Barr virus	EBV	dsDNA	Herpesviridae
S100A10	Epstein-Barr virus	EBV	dsDNA	Herpesviridae
TAF6L	Epstein-Barr virus	EBV	dsDNA	Herpesviridae
TAPBP	Epstein-Barr virus	EBV	dsDNA	Herpesviridae
SRRM2	Epstein-Barr virus	EBV	dsDNA	Herpesviridae
MRC2	Epstein-Barr virus	EBV	dsDNA	Herpesviridae
FBLN5	Epstein-Barr virus	EBV	dsDNA	Herpesviridae
UBR5	Epstein-Barr virus	EBV	dsDNA	Herpesviridae
HOMER3	Epstein-Barr virus	EBV	dsDNA	Herpesviridae
ADAM10	Epstein-Barr virus	EBV	dsDNA	Herpesviridae
GCA	Epstein-Barr virus	EBV	dsDNA	Herpesviridae
ZNF250	Epstein-Barr virus	EBV	dsDNA	Herpesviridae
ABCA13	Epstein-Barr virus	EBV	dsDNA	Herpesviridae
IGF2BP1	Epstein-Barr virus	EBV	dsDNA	Herpesviridae
IGF2BP3	Epstein-Barr virus	EBV	dsDNA	Herpesviridae
KPNA1	Epstein-Barr virus	EBV	dsDNA	Herpesviridae
ADCY6	Epstein-Barr virus	EBV	dsDNA	Herpesviridae
KPNA6	Epstein-Barr virus	EBV	dsDNA	Herpesviridae
KRT36	Epstein-Barr virus	EBV	dsDNA	Herpesviridae
RPL3	Epstein-Barr virus	EBV	dsDNA	Herpesviridae
PIGT	Epstein-Barr virus	EBV	dsDNA	Herpesviridae
TES	Epstein-Barr virus	EBV	dsDNA	Herpesviridae
TSG101	Epstein-Barr virus	EBV	dsDNA	Herpesviridae
CDS2	Epstein-Barr virus	EBV	dsDNA	Herpesviridae
GAS6	Epstein-Barr virus	EBV	dsDNA	Herpesviridae
CAP2	Epstein-Barr virus	EBV	dsDNA	Herpesviridae
LAYN	Epstein-Barr virus	EBV	dsDNA	Herpesviridae
LIFR	Epstein-Barr virus	EBV	dsDNA	Herpesviridae
LRP12	Epstein-Barr virus	EBV	dsDNA	Herpesviridae
NDFIP1	Epstein-Barr virus	EBV	dsDNA	Herpesviridae
DVL2	Epstein-Barr virus	EBV	dsDNA	Herpesviridae
ATP5PF	Epstein-Barr virus	EBV	dsDNA	Herpesviridae
RAB5C	Epstein-Barr virus	EBV	dsDNA	Herpesviridae
OGT	Epstein-Barr virus	EBV	dsDNA	Herpesviridae
PDLIM4	Epstein-Barr virus	EBV	dsDNA	Herpesviridae
PALM	Epstein-Barr virus	EBV	dsDNA	Herpesviridae
BDKRB2	Epstein-Barr virus	EBV	dsDNA	Herpesviridae
SRPK1	Epstein-Barr virus	EBV	dsDNA	Herpesviridae
SRPK2	Epstein-Barr virus	EBV	dsDNA	Herpesviridae
CANX	Epstein-Barr virus	EBV	dsDNA	Herpesviridae
CCDC155	Epstein-Barr virus	EBV	dsDNA	Herpesviridae
TLE5	Epstein-Barr virus	EBV	dsDNA	Herpesviridae
PDIA4	Epstein-Barr virus	EBV	dsDNA	Herpesviridae
TNKS2	Epstein-Barr virus	EBV	dsDNA	Herpesviridae
CDIPT	Epstein-Barr virus	EBV	dsDNA	Herpesviridae
CSE1L	Epstein-Barr virus	EBV	dsDNA	Herpesviridae
PRKACA	Epstein-Barr virus	EBV	dsDNA	Herpesviridae
DDX5	Epstein-Barr virus	EBV	dsDNA	Herpesviridae
CHRM2	Epstein-Barr virus	EBV	dsDNA	Herpesviridae
TNFRSF10D	Epstein-Barr virus	EBV	dsDNA	Herpesviridae
CLU	Epstein-Barr virus	EBV	dsDNA	Herpesviridae
PJA2	Epstein-Barr virus	EBV	dsDNA	Herpesviridae
PPM1A	Epstein-Barr virus	EBV	dsDNA	Herpesviridae
PPP6R1	Epstein-Barr virus	EBV	dsDNA	Herpesviridae
PRKAR1A	Epstein-Barr virus	EBV	dsDNA	Herpesviridae
SYT11	Epstein-Barr virus	EBV	dsDNA	Herpesviridae
PSMA1	Epstein-Barr virus	EBV	dsDNA	Herpesviridae
PSMA4	Epstein-Barr virus	EBV	dsDNA	Herpesviridae
PSMA5	Epstein-Barr virus	EBV	dsDNA	Herpesviridae
MAPK7	Epstein-Barr virus	EBV	dsDNA	Herpesviridae
PSMA7	Epstein-Barr virus	EBV	dsDNA	Herpesviridae
H1-10	Epstein-Barr virus	EBV	dsDNA	Herpesviridae
UGCG	Epstein-Barr virus	EBV	dsDNA	Herpesviridae
PSMB4	Epstein-Barr virus	EBV	dsDNA	Herpesviridae
PSMC2	Epstein-Barr virus	EBV	dsDNA	Herpesviridae
PSMC3	Epstein-Barr virus	EBV	dsDNA	Herpesviridae
PSMC5	Epstein-Barr virus	EBV	dsDNA	Herpesviridae
PSMC6	Epstein-Barr virus	EBV	dsDNA	Herpesviridae
AP2A1	Epstein-Barr virus	EBV	dsDNA	Herpesviridae
PSMD12	Epstein-Barr virus	EBV	dsDNA	Herpesviridae
PSMD13	Epstein-Barr virus	EBV	dsDNA	Herpesviridae
DPP7	Epstein-Barr virus	EBV	dsDNA	Herpesviridae
PSMD3	Epstein-Barr virus	EBV	dsDNA	Herpesviridae
EI24	Epstein-Barr virus	EBV	dsDNA	Herpesviridae
CEPT1	Epstein-Barr virus	EBV	dsDNA	Herpesviridae
PSMD8	Epstein-Barr virus	EBV	dsDNA	Herpesviridae
ERBB2	Epstein-Barr virus	EBV	dsDNA	Herpesviridae
RBMS2	Epstein-Barr virus	EBV	dsDNA	Herpesviridae
RIN1	Epstein-Barr virus	EBV	dsDNA	Herpesviridae
RNF126	Epstein-Barr virus	EBV	dsDNA	Herpesviridae
UBQLN1	Epstein-Barr virus	EBV	dsDNA	Herpesviridae
DPY19L1	Epstein-Barr virus	EBV	dsDNA	Herpesviridae
EIF4G1	Epstein-Barr virus	EBV	dsDNA	Herpesviridae
CTSB	Epstein-Barr virus	EBV	dsDNA	Herpesviridae
DNAJA1	Epstein-Barr virus	EBV	dsDNA	Herpesviridae
SURF4	Epstein-Barr virus	EBV	dsDNA	Herpesviridae
POLD2	Epstein-Barr virus	EBV	dsDNA	Herpesviridae
POLDIP2	Epstein-Barr virus	EBV	dsDNA	Herpesviridae
TREX2	Epstein-Barr virus	EBV	dsDNA	Herpesviridae
TRIM28	Epstein-Barr virus	EBV	dsDNA	Herpesviridae
KARS1	Epstein-Barr virus	EBV	dsDNA	Herpesviridae
RELA	Epstein-Barr virus	EBV	dsDNA	Herpesviridae
CSF1	Epstein-Barr virus	EBV	dsDNA	Herpesviridae
MARCKSL1	Epstein-Barr virus	EBV	dsDNA	Herpesviridae
MGARP	Epstein-Barr virus	EBV	dsDNA	Herpesviridae
MT-CO2	Epstein-Barr virus	EBV	dsDNA	Herpesviridae
TNFAIP3	Epstein-Barr virus	EBV	dsDNA	Herpesviridae
NUP153	Epstein-Barr virus	EBV	dsDNA	Herpesviridae
DAXX	Epstein-Barr virus	EBV	dsDNA	Herpesviridae
PFAS	Epstein-Barr virus	EBV	dsDNA	Herpesviridae
LAMA3	Epstein-Barr virus	EBV	dsDNA	Herpesviridae
GMPS	Epstein-Barr virus	EBV	dsDNA	Herpesviridae
HNRNPA3	Epstein-Barr virus	EBV	dsDNA	Herpesviridae
BEND7	Epstein-Barr virus	EBV	dsDNA	Herpesviridae
COIL	Epstein-Barr virus	EBV	dsDNA	Herpesviridae
KHDRBS2	Epstein-Barr virus	EBV	dsDNA	Herpesviridae
MAPRE1	Epstein-Barr virus	EBV	dsDNA	Herpesviridae
PDE4DIP	Epstein-Barr virus	EBV	dsDNA	Herpesviridae
RBBP7	Epstein-Barr virus	EBV	dsDNA	Herpesviridae
SLIT2	Epstein-Barr virus	EBV	dsDNA	Herpesviridae
SH3BP4	Epstein-Barr virus	EBV	dsDNA	Herpesviridae
IKBIP	Epstein-Barr virus	EBV	dsDNA	Herpesviridae
RPL10	Epstein-Barr virus	EBV	dsDNA	Herpesviridae
PLXNB2	Epstein-Barr virus	EBV	dsDNA	Herpesviridae
SSR4	Epstein-Barr virus	EBV	dsDNA	Herpesviridae
TAB1	Epstein-Barr virus	EBV	dsDNA	Herpesviridae
TMEM33	Epstein-Barr virus	EBV	dsDNA	Herpesviridae
NFKB2	Epstein-Barr virus	EBV	dsDNA	Herpesviridae
RPL22	Epstein-Barr virus	EBV	dsDNA	Herpesviridae
MAVS	Epstein-Barr virus	EBV	dsDNA	Herpesviridae
MFSD10	Epstein-Barr virus	EBV	dsDNA	Herpesviridae
MGST1	Epstein-Barr virus	EBV	dsDNA	Herpesviridae
MICOS13	Epstein-Barr virus	EBV	dsDNA	Herpesviridae
MMP14	Epstein-Barr virus	EBV	dsDNA	Herpesviridae
SRPRA	Epstein-Barr virus	EBV	dsDNA	Herpesviridae
MPZL1	Epstein-Barr virus	EBV	dsDNA	Herpesviridae
EGFL7	Epstein-Barr virus	EBV	dsDNA	Herpesviridae
TGFB1I1	Epstein-Barr virus	EBV	dsDNA	Herpesviridae
EBNA1BP2	Epstein-Barr virus	EBV	dsDNA	Herpesviridae
FARP1	Epstein-Barr virus	EBV	dsDNA	Herpesviridae
FCHSD1	Epstein-Barr virus	EBV	dsDNA	Herpesviridae
MYLK	Epstein-Barr virus	EBV	dsDNA	Herpesviridae
NCEH1	Epstein-Barr virus	EBV	dsDNA	Herpesviridae
CERS4	Epstein-Barr virus	EBV	dsDNA	Herpesviridae
CIR1	Epstein-Barr virus	EBV	dsDNA	Herpesviridae
CLK1	Epstein-Barr virus	EBV	dsDNA	Herpesviridae
PDIA3	Epstein-Barr virus	EBV	dsDNA	Herpesviridae
HBB	Epstein-Barr virus	EBV	dsDNA	Herpesviridae
HLA-A	Epstein-Barr virus	EBV	dsDNA	Herpesviridae
HLA-B	Epstein-Barr virus	EBV	dsDNA	Herpesviridae
NUCB2	Epstein-Barr virus	EBV	dsDNA	Herpesviridae
PI4K2A	Epstein-Barr virus	EBV	dsDNA	Herpesviridae
PIP4P2	Epstein-Barr virus	EBV	dsDNA	Herpesviridae
FHL3	Epstein-Barr virus	EBV	dsDNA	Herpesviridae
FN1	Epstein-Barr virus	EBV	dsDNA	Herpesviridae
MKRN3	Epstein-Barr virus	EBV	dsDNA	Herpesviridae
NECAB2	Epstein-Barr virus	EBV	dsDNA	Herpesviridae
PDE6G	Epstein-Barr virus	EBV	dsDNA	Herpesviridae
MAGED1	Epstein-Barr virus	EBV	dsDNA	Herpesviridae
PDLIM7	Epstein-Barr virus	EBV	dsDNA	Herpesviridae
PNKD	Epstein-Barr virus	EBV	dsDNA	Herpesviridae
ATP5PD	Epstein-Barr virus	EBV	dsDNA	Herpesviridae
S100A6	Epstein-Barr virus	EBV	dsDNA	Herpesviridae
AGR2	Epstein-Barr virus	EBV	dsDNA	Herpesviridae
AXL	Epstein-Barr virus	EBV	dsDNA	Herpesviridae
PDCD6IP	Epstein-Barr virus	EBV	dsDNA	Herpesviridae
BSG	Epstein-Barr virus	EBV	dsDNA	Herpesviridae
TBXAS1	Epstein-Barr virus	EBV	dsDNA	Herpesviridae
TOR1AIP2	Epstein-Barr virus	EBV	dsDNA	Herpesviridae
ZDHHC17	Epstein-Barr virus	EBV	dsDNA	Herpesviridae
CAPN1	Epstein-Barr virus	EBV	dsDNA	Herpesviridae
CAD	Epstein-Barr virus	EBV	dsDNA	Herpesviridae
CCNDBP1	Epstein-Barr virus	EBV	dsDNA	Herpesviridae
CCDC168	Epstein-Barr virus	EBV	dsDNA	Herpesviridae
ITIH3	Epstein-Barr virus	EBV	dsDNA	Herpesviridae
CDKN2A	Epstein-Barr virus	EBV	dsDNA	Herpesviridae
CGRRF1	Epstein-Barr virus	EBV	dsDNA	Herpesviridae
CHCHD3	Epstein-Barr virus	EBV	dsDNA	Herpesviridae
CHP1	Epstein-Barr virus	EBV	dsDNA	Herpesviridae
H3C1	Epstein-Barr virus	EBV	dsDNA	Herpesviridae
DNAJB1	Epstein-Barr virus	EBV	dsDNA	Herpesviridae
DNAJB5	Epstein-Barr virus	EBV	dsDNA	Herpesviridae
TPP1	Epstein-Barr virus	EBV	dsDNA	Herpesviridae
EIF2S1	Epstein-Barr virus	EBV	dsDNA	Herpesviridae
EIF3B	Epstein-Barr virus	EBV	dsDNA	Herpesviridae
FKBP14	Epstein-Barr virus	EBV	dsDNA	Herpesviridae
PRRC2C	Epstein-Barr virus	EBV	dsDNA	Herpesviridae
FLNC	Epstein-Barr virus	EBV	dsDNA	Herpesviridae
CCDC14	Epstein-Barr virus	EBV	dsDNA	Herpesviridae
CTSC	Epstein-Barr virus	EBV	dsDNA	Herpesviridae
VWF	Epstein-Barr virus	EBV	dsDNA	Herpesviridae
GRPEL1	Epstein-Barr virus	EBV	dsDNA	Herpesviridae
KANK2	Epstein-Barr virus	EBV	dsDNA	Herpesviridae
PSMB1	Epstein-Barr virus	EBV	dsDNA	Herpesviridae
HAX1	Epstein-Barr virus	EBV	dsDNA	Herpesviridae
LCK	Epstein-Barr virus	EBV	dsDNA	Herpesviridae
IGLL1	Epstein-Barr virus	EBV	dsDNA	Herpesviridae
AIMP2	Epstein-Barr virus	EBV	dsDNA	Herpesviridae
ANXA11	Epstein-Barr virus	EBV	dsDNA	Herpesviridae
SEC16A	Epstein-Barr virus	EBV	dsDNA	Herpesviridae
RCN1	Epstein-Barr virus	EBV	dsDNA	Herpesviridae
TOR4A	Epstein-Barr virus	EBV	dsDNA	Herpesviridae
HNRNPM	Epstein-Barr virus	EBV	dsDNA	Herpesviridae
HNRNPR	Epstein-Barr virus	EBV	dsDNA	Herpesviridae
EFNB1	Epstein-Barr virus	EBV	dsDNA	Herpesviridae
XPC	Epstein-Barr virus	EBV	dsDNA	Herpesviridae
STIM1	Epstein-Barr virus	EBV	dsDNA	Herpesviridae
STOM	Epstein-Barr virus	EBV	dsDNA	Herpesviridae
CUL4A	Epstein-Barr virus	EBV	dsDNA	Herpesviridae
CUL4B	Epstein-Barr virus	EBV	dsDNA	Herpesviridae
CUL5	Epstein-Barr virus	EBV	dsDNA	Herpesviridae
DNAJB12	Epstein-Barr virus	EBV	dsDNA	Herpesviridae
CEP44	Epstein-Barr virus	EBV	dsDNA	Herpesviridae
ENPP1	Epstein-Barr virus	EBV	dsDNA	Herpesviridae
EVA1A	Epstein-Barr virus	EBV	dsDNA	Herpesviridae
STX7	Epstein-Barr virus	EBV	dsDNA	Herpesviridae
GLG1	Epstein-Barr virus	EBV	dsDNA	Herpesviridae
TAP1	Epstein-Barr virus	EBV	dsDNA	Herpesviridae
CRTC1	Epstein-Barr virus	EBV	dsDNA	Herpesviridae
HUWE1	Epstein-Barr virus	EBV	dsDNA	Herpesviridae
IPO7	Epstein-Barr virus	EBV	dsDNA	Herpesviridae
RACK1	Epstein-Barr virus	EBV	dsDNA	Herpesviridae
GCN1	Epstein-Barr virus	EBV	dsDNA	Herpesviridae
GGCX	Epstein-Barr virus	EBV	dsDNA	Herpesviridae
TRIM65	Epstein-Barr virus	EBV	dsDNA	Herpesviridae
GJA1	Epstein-Barr virus	EBV	dsDNA	Herpesviridae
UBL4A	Epstein-Barr virus	EBV	dsDNA	Herpesviridae
P4HA2	Epstein-Barr virus	EBV	dsDNA	Herpesviridae
NAP1L4	Epstein-Barr virus	EBV	dsDNA	Herpesviridae
PML	Epstein-Barr virus	EBV	dsDNA	Herpesviridae
TAF1A	Epstein-Barr virus	EBV	dsDNA	Herpesviridae
TAF1B	Epstein-Barr virus	EBV	dsDNA	Herpesviridae
HDLBP	Epstein-Barr virus	EBV	dsDNA	Herpesviridae
POLD1	Epstein-Barr virus	EBV	dsDNA	Herpesviridae
BAG4	Epstein-Barr virus	EBV	dsDNA	Herpesviridae
CENPJ	Epstein-Barr virus	EBV	dsDNA	Herpesviridae
DDX20	Epstein-Barr virus	EBV	dsDNA	Herpesviridae
PRMT2	Epstein-Barr virus	EBV	dsDNA	Herpesviridae
RPS5	Epstein-Barr virus	EBV	dsDNA	Herpesviridae
SDHB	Epstein-Barr virus	EBV	dsDNA	Herpesviridae
ATP5MD	Epstein-Barr virus	EBV	dsDNA	Herpesviridae
IGF2R	Epstein-Barr virus	EBV	dsDNA	Herpesviridae
RBMX	Epstein-Barr virus	EBV	dsDNA	Herpesviridae
IL6ST	Epstein-Barr virus	EBV	dsDNA	Herpesviridae
IMMT	Epstein-Barr virus	EBV	dsDNA	Herpesviridae
SPPL2B	Epstein-Barr virus	EBV	dsDNA	Herpesviridae
P4HB	Epstein-Barr virus	EBV	dsDNA	Herpesviridae
BACE2	Epstein-Barr virus	EBV	dsDNA	Herpesviridae
SNRPD2	Epstein-Barr virus	EBV	dsDNA	Herpesviridae
VRK2	Epstein-Barr virus	EBV	dsDNA	Herpesviridae
RPL23	Epstein-Barr virus	EBV	dsDNA	Herpesviridae
RPL24	Epstein-Barr virus	EBV	dsDNA	Herpesviridae
RPL26	Epstein-Barr virus	EBV	dsDNA	Herpesviridae
YWHAE	Epstein-Barr virus	EBV	dsDNA	Herpesviridae
DKK3	Epstein-Barr virus	EBV	dsDNA	Herpesviridae
EFEMP1	Epstein-Barr virus	EBV	dsDNA	Herpesviridae
EFEMP2	Epstein-Barr virus	EBV	dsDNA	Herpesviridae
RPL7A	Epstein-Barr virus	EBV	dsDNA	Herpesviridae
RPL8	Epstein-Barr virus	EBV	dsDNA	Herpesviridae
RPL9	Epstein-Barr virus	EBV	dsDNA	Herpesviridae
RPS11	Epstein-Barr virus	EBV	dsDNA	Herpesviridae
ACTN4	Epstein-Barr virus	EBV	dsDNA	Herpesviridae
GRN	Epstein-Barr virus	EBV	dsDNA	Herpesviridae
BANP	Epstein-Barr virus	EBV	dsDNA	Herpesviridae
GMCL1	Epstein-Barr virus	EBV	dsDNA	Herpesviridae
LILRB1	Epstein-Barr virus	EBV	dsDNA	Herpesviridae
OPTN	Epstein-Barr virus	EBV	dsDNA	Herpesviridae
PLSCR1	Epstein-Barr virus	EBV	dsDNA	Herpesviridae
RBCK1	Epstein-Barr virus	EBV	dsDNA	Herpesviridae
RBPMS	Epstein-Barr virus	EBV	dsDNA	Herpesviridae
TRAF3IP3	Epstein-Barr virus	EBV	dsDNA	Herpesviridae
TSNARE1	Epstein-Barr virus	EBV	dsDNA	Herpesviridae
TUBA1A	Epstein-Barr virus	EBV	dsDNA	Herpesviridae
FAT1	Epstein-Barr virus	EBV	dsDNA	Herpesviridae
RNF31	Epstein-Barr virus	EBV	dsDNA	Herpesviridae
GALNT5	Epstein-Barr virus	EBV	dsDNA	Herpesviridae
ICAM1	Epstein-Barr virus	EBV	dsDNA	Herpesviridae
LAMC1	Epstein-Barr virus	EBV	dsDNA	Herpesviridae
LGALS3BP	Epstein-Barr virus	EBV	dsDNA	Herpesviridae
ATP5F1C	Epstein-Barr virus	EBV	dsDNA	Herpesviridae
DHCR24	Epstein-Barr virus	EBV	dsDNA	Herpesviridae
ATP5MG	Epstein-Barr virus	EBV	dsDNA	Herpesviridae
MED4	Epstein-Barr virus	EBV	dsDNA	Herpesviridae
RPL37A	Epstein-Barr virus	EBV	dsDNA	Herpesviridae
SFXN3	Epstein-Barr virus	EBV	dsDNA	Herpesviridae
SLC16A3	Epstein-Barr virus	EBV	dsDNA	Herpesviridae
HSPA1A	Epstein-Barr virus	EBV	dsDNA	Herpesviridae
CALCOCO2	Epstein-Barr virus	EBV	dsDNA	Herpesviridae
CD248	Epstein-Barr virus	EBV	dsDNA	Herpesviridae
SRSF1	Epstein-Barr virus	EBV	dsDNA	Herpesviridae
SSBP1	Epstein-Barr virus	EBV	dsDNA	Herpesviridae
SYNCRIP	Epstein-Barr virus	EBV	dsDNA	Herpesviridae
SRRM1	Epstein-Barr virus	EBV	dsDNA	Herpesviridae
STAU1	Epstein-Barr virus	EBV	dsDNA	Herpesviridae
CHCHD4	Epstein-Barr virus	EBV	dsDNA	Herpesviridae
JCAD	Epstein-Barr virus	EBV	dsDNA	Herpesviridae
KIF1B	Epstein-Barr virus	EBV	dsDNA	Herpesviridae
NPC2	Epstein-Barr virus	EBV	dsDNA	Herpesviridae
PIP4P1	Epstein-Barr virus	EBV	dsDNA	Herpesviridae
DDX17	Epstein-Barr virus	EBV	dsDNA	Herpesviridae
GTF2E1	Epstein-Barr virus	EBV	dsDNA	Herpesviridae
H4C1	Epstein-Barr virus	EBV	dsDNA	Herpesviridae
HLTF	Epstein-Barr virus	EBV	dsDNA	Herpesviridae
ERLIN1	Epstein-Barr virus	EBV	dsDNA	Herpesviridae
CLPTM1	Epstein-Barr virus	EBV	dsDNA	Herpesviridae
FATE1	Epstein-Barr virus	EBV	dsDNA	Herpesviridae
LDLR	Epstein-Barr virus	EBV	dsDNA	Herpesviridae
MIPOL1	Epstein-Barr virus	EBV	dsDNA	Herpesviridae
COPA	Epstein-Barr virus	EBV	dsDNA	Herpesviridae
TNXB	Epstein-Barr virus	EBV	dsDNA	Herpesviridae
COPB2	Epstein-Barr virus	EBV	dsDNA	Herpesviridae
RNF181	Epstein-Barr virus	EBV	dsDNA	Herpesviridae
GLUD1	Epstein-Barr virus	EBV	dsDNA	Herpesviridae
ITPRID2	Epstein-Barr virus	EBV	dsDNA	Herpesviridae
LMO7	Epstein-Barr virus	EBV	dsDNA	Herpesviridae
PSMB2	Epstein-Barr virus	EBV	dsDNA	Herpesviridae
CYBRD1	Epstein-Barr virus	EBV	dsDNA	Herpesviridae
SP1	Epstein-Barr virus	EBV	dsDNA	Herpesviridae
LNX1	Epstein-Barr virus	EBV	dsDNA	Herpesviridae
RUVBL2	Epstein-Barr virus	EBV	dsDNA	Herpesviridae
ESRRA	Epstein-Barr virus	EBV	dsDNA	Herpesviridae
TERF2	Epstein-Barr virus	EBV	dsDNA	Herpesviridae
CD63	Epstein-Barr virus	EBV	dsDNA	Herpesviridae
IKBKB	Epstein-Barr virus	EBV	dsDNA	Herpesviridae
IRF7	Epstein-Barr virus	EBV	dsDNA	Herpesviridae
LGALS9	Epstein-Barr virus	EBV	dsDNA	Herpesviridae
RPS24	Epstein-Barr virus	EBV	dsDNA	Herpesviridae
SPARC	Epstein-Barr virus	EBV	dsDNA	Herpesviridae
SRR	Epstein-Barr virus	EBV	dsDNA	Herpesviridae
CAVIN1	Epstein-Barr virus	EBV	dsDNA	Herpesviridae
CCT3	Epstein-Barr virus	EBV	dsDNA	Herpesviridae
DDX6	Epstein-Barr virus	EBV	dsDNA	Herpesviridae
TRAF3	Epstein-Barr virus	EBV	dsDNA	Herpesviridae
BLNK	Epstein-Barr virus	EBV	dsDNA	Herpesviridae
CNN2	Epstein-Barr virus	EBV	dsDNA	Herpesviridae
CNP	Epstein-Barr virus	EBV	dsDNA	Herpesviridae
FNDC3B	Epstein-Barr virus	EBV	dsDNA	Herpesviridae
FXR1	Epstein-Barr virus	EBV	dsDNA	Herpesviridae
CRTAC1	Epstein-Barr virus	EBV	dsDNA	Herpesviridae
TCP11L1	Epstein-Barr virus	EBV	dsDNA	Herpesviridae
CRTC2	Epstein-Barr virus	EBV	dsDNA	Herpesviridae
CRTC3	Epstein-Barr virus	EBV	dsDNA	Herpesviridae
GBF1	Epstein-Barr virus	EBV	dsDNA	Herpesviridae
ITFG1	Epstein-Barr virus	EBV	dsDNA	Herpesviridae
KCTD12	Epstein-Barr virus	EBV	dsDNA	Herpesviridae
LEMD3	Epstein-Barr virus	EBV	dsDNA	Herpesviridae
RPS17	Epstein-Barr virus	EBV	dsDNA	Herpesviridae
RPS18	Epstein-Barr virus	EBV	dsDNA	Herpesviridae
GLIPR2	Epstein-Barr virus	EBV	dsDNA	Herpesviridae
HMGB2	Epstein-Barr virus	EBV	dsDNA	Herpesviridae
MDM2	Epstein-Barr virus	EBV	dsDNA	Herpesviridae
RPA1	Epstein-Barr virus	EBV	dsDNA	Herpesviridae
HCCS	Epstein-Barr virus	EBV	dsDNA	Herpesviridae
PON2	Epstein-Barr virus	EBV	dsDNA	Herpesviridae
PROCR	Epstein-Barr virus	EBV	dsDNA	Herpesviridae
PTPN1	Epstein-Barr virus	EBV	dsDNA	Herpesviridae
SSB	Epstein-Barr virus	EBV	dsDNA	Herpesviridae
ROBO1	Epstein-Barr virus	EBV	dsDNA	Herpesviridae
RP2	Epstein-Barr virus	EBV	dsDNA	Herpesviridae
TP53	Epstein-Barr virus	EBV	dsDNA	Herpesviridae
SSX2IP	Epstein-Barr virus	EBV	dsDNA	Herpesviridae
TSC22D4	Epstein-Barr virus	EBV	dsDNA	Herpesviridae
SERBP1	Epstein-Barr virus	EBV	dsDNA	Herpesviridae
ICMT	Epstein-Barr virus	EBV	dsDNA	Herpesviridae
PFN2	Epstein-Barr virus	EBV	dsDNA	Herpesviridae
PLD3	Epstein-Barr virus	EBV	dsDNA	Herpesviridae
BAK1	Epstein-Barr virus	EBV	dsDNA	Herpesviridae
MAP3K7	Epstein-Barr virus	EBV	dsDNA	Herpesviridae
RIPK1	Epstein-Barr virus	EBV	dsDNA	Herpesviridae
SNX4	Epstein-Barr virus	EBV	dsDNA	Herpesviridae
PIAS2	Epstein-Barr virus	EBV	dsDNA	Herpesviridae
PSME3	Epstein-Barr virus	EBV	dsDNA	Herpesviridae
PXN	Epstein-Barr virus	EBV	dsDNA	Herpesviridae
AKAP8L	Epstein-Barr virus	EBV	dsDNA	Herpesviridae
RPL27A	Epstein-Barr virus	EBV	dsDNA	Herpesviridae
RPL31	Epstein-Barr virus	EBV	dsDNA	Herpesviridae
SEPTIN9	Epstein-Barr virus	EBV	dsDNA	Herpesviridae
RPL7	Epstein-Barr virus	EBV	dsDNA	Herpesviridae
CD5L	Epstein-Barr virus	EBV	dsDNA	Herpesviridae
ABCA1	Epstein-Barr virus	EBV	dsDNA	Herpesviridae
MRGPRF	Epstein-Barr virus	EBV	dsDNA	Herpesviridae
MT-ATP6	Epstein-Barr virus	EBV	dsDNA	Herpesviridae
RPS13	Epstein-Barr virus	EBV	dsDNA	Herpesviridae
RPS14	Epstein-Barr virus	EBV	dsDNA	Herpesviridae
RPS15	Epstein-Barr virus	EBV	dsDNA	Herpesviridae
RPS16	Epstein-Barr virus	EBV	dsDNA	Herpesviridae
EGLN2	Epstein-Barr virus	EBV	dsDNA	Herpesviridae
PSME2	Epstein-Barr virus	EBV	dsDNA	Herpesviridae
RPS2	Epstein-Barr virus	EBV	dsDNA	Herpesviridae
RPS23	Epstein-Barr virus	EBV	dsDNA	Herpesviridae
KPNA2	Epstein-Barr virus	EBV	dsDNA	Herpesviridae
KPNA3	Epstein-Barr virus	EBV	dsDNA	Herpesviridae
RPS4X	Epstein-Barr virus	EBV	dsDNA	Herpesviridae
ANKRD13A	Epstein-Barr virus	EBV	dsDNA	Herpesviridae
NCKIPSD	Epstein-Barr virus	EBV	dsDNA	Herpesviridae
ARL1	Epstein-Barr virus	EBV	dsDNA	Herpesviridae
ATP13A3	Epstein-Barr virus	EBV	dsDNA	Herpesviridae
ATP1A1	Epstein-Barr virus	EBV	dsDNA	Herpesviridae
ATP2B4	Epstein-Barr virus	EBV	dsDNA	Herpesviridae
ATP2C1	Epstein-Barr virus	EBV	dsDNA	Herpesviridae
DGAT1	Epstein-Barr virus	EBV	dsDNA	Herpesviridae
HSDL1	Epstein-Barr virus	EBV	dsDNA	Herpesviridae
MAGED2	Epstein-Barr virus	EBV	dsDNA	Herpesviridae
RPL35	Epstein-Barr virus	EBV	dsDNA	Herpesviridae
IGHG1	Epstein-Barr virus	EBV	dsDNA	Herpesviridae
RPL39	Epstein-Barr virus	EBV	dsDNA	Herpesviridae
SLC22A18	Epstein-Barr virus	EBV	dsDNA	Herpesviridae
PARP4	Epstein-Barr virus	EBV	dsDNA	Herpesviridae
ATP5PO	Epstein-Barr virus	EBV	dsDNA	Herpesviridae
CUL2	Epstein-Barr virus	EBV	dsDNA	Herpesviridae
RANBP2	Epstein-Barr virus	EBV	dsDNA	Herpesviridae
POU2F1	Epstein-Barr virus	EBV	dsDNA	Herpesviridae
ACTB	Epstein-Barr virus	EBV	dsDNA	Herpesviridae
CEP170	Epstein-Barr virus	EBV	dsDNA	Herpesviridae
PLOD1	Epstein-Barr virus	EBV	dsDNA	Herpesviridae
IGF2BP2	Epstein-Barr virus	EBV	dsDNA	Herpesviridae
CAPZA1	Epstein-Barr virus	EBV	dsDNA	Herpesviridae
CDK1	Epstein-Barr virus	EBV	dsDNA	Herpesviridae
UPF1	Epstein-Barr virus	EBV	dsDNA	Herpesviridae
ZMYND11	Epstein-Barr virus	EBV	dsDNA	Herpesviridae
GTF2B	Epstein-Barr virus	EBV	dsDNA	Herpesviridae
PITPNM3	Epstein-Barr virus	EBV	dsDNA	Herpesviridae
GTF2E2	Epstein-Barr virus	EBV	dsDNA	Herpesviridae
CKAP5	Epstein-Barr virus	EBV	dsDNA	Herpesviridae
MACROH2A1	Epstein-Barr virus	EBV	dsDNA	Herpesviridae
DNAJB6	Epstein-Barr virus	EBV	dsDNA	Herpesviridae
TRIM32	Epstein-Barr virus	EBV	dsDNA	Herpesviridae
NDUFA4	Epstein-Barr virus	EBV	dsDNA	Herpesviridae
PSME3IP1	Epstein-Barr virus	EBV	dsDNA	Herpesviridae
PSME4	Epstein-Barr virus	EBV	dsDNA	Herpesviridae
CHPF	Epstein-Barr virus	EBV	dsDNA	Herpesviridae
PSMG1	Epstein-Barr virus	EBV	dsDNA	Herpesviridae
WAPL	Epstein-Barr virus	EBV	dsDNA	Herpesviridae
EMD	Epstein-Barr virus	EBV	dsDNA	Herpesviridae
BCL6	Epstein-Barr virus	EBV	dsDNA	Herpesviridae
TOR1AIP1	Epstein-Barr virus	EBV	dsDNA	Herpesviridae
LOX	Epstein-Barr virus	EBV	dsDNA	Herpesviridae
WWP1	Epstein-Barr virus	EBV	dsDNA	Herpesviridae
DDOST	Epstein-Barr virus	EBV	dsDNA	Herpesviridae
DDR2	Epstein-Barr virus	EBV	dsDNA	Herpesviridae
HMOX2	Epstein-Barr virus	EBV	dsDNA	Herpesviridae
RBP1	Epstein-Barr virus	EBV	dsDNA	Herpesviridae
TRA2B	Epstein-Barr virus	EBV	dsDNA	Herpesviridae
SLC26A3	Epstein-Barr virus	EBV	dsDNA	Herpesviridae
ZAP70	Epstein-Barr virus	EBV	dsDNA	Herpesviridae
HNRNPCL1	Epstein-Barr virus	EBV	dsDNA	Herpesviridae
NTN4	Epstein-Barr virus	EBV	dsDNA	Herpesviridae
DPM1	Epstein-Barr virus	EBV	dsDNA	Herpesviridae
HNRNPU	Epstein-Barr virus	EBV	dsDNA	Herpesviridae
SELENOP	Epstein-Barr virus	EBV	dsDNA	Herpesviridae
SFRP1	Epstein-Barr virus	EBV	dsDNA	Herpesviridae
TNIK	Epstein-Barr virus	EBV	dsDNA	Herpesviridae
TRADD	Epstein-Barr virus	EBV	dsDNA	Herpesviridae
TRIO	Epstein-Barr virus	EBV	dsDNA	Herpesviridae
HELZ	Epstein-Barr virus	EBV	dsDNA	Herpesviridae
C1QBP	Epstein-Barr virus	EBV	dsDNA	Herpesviridae
CBLIF	Epstein-Barr virus	EBV	dsDNA	Herpesviridae
YWHAG	Epstein-Barr virus	EBV	dsDNA	Herpesviridae
STX4	Epstein-Barr virus	EBV	dsDNA	Herpesviridae
GSPT1	Epstein-Barr virus	EBV	dsDNA	Herpesviridae
HGS	Epstein-Barr virus	EBV	dsDNA	Herpesviridae
TMCO4	Epstein-Barr virus	EBV	dsDNA	Herpesviridae
GALNT1	Epstein-Barr virus	EBV	dsDNA	Herpesviridae
FTH1	Epstein-Barr virus	EBV	dsDNA	Herpesviridae
TNKS1BP1	Epstein-Barr virus	EBV	dsDNA	Herpesviridae
TRAFD1	Epstein-Barr virus	EBV	dsDNA	Herpesviridae
CEP76	Epstein-Barr virus	EBV	dsDNA	Herpesviridae
PFKL	Epstein-Barr virus	EBV	dsDNA	Herpesviridae
NPEPPS	Epstein-Barr virus	EBV	dsDNA	Herpesviridae
AHCYL1	Epstein-Barr virus	EBV	dsDNA	Herpesviridae
NDE1	Epstein-Barr virus	EBV	dsDNA	Herpesviridae
NECTIN2	Epstein-Barr virus	EBV	dsDNA	Herpesviridae
NME3	Epstein-Barr virus	EBV	dsDNA	Herpesviridae
NUP205	Epstein-Barr virus	EBV	dsDNA	Herpesviridae
P4HA3	Epstein-Barr virus	EBV	dsDNA	Herpesviridae
PRPF39	Epstein-Barr virus	EBV	dsDNA	Herpesviridae
[truncated: 18,032 more rows]

## Sheet: VTM
Virus	Abbre	Baltimore	Family	Module	P_value	ADJ_pvalue
Dengue virus 2	DENV-2	(+)ssRNA	Flaviviridae	173	0.00196563	0.0321626
Dengue virus 2	DENV-2	(+)ssRNA	Flaviviridae	221	0.000901255	0.0203776
Dengue virus 2	DENV-2	(+)ssRNA	Flaviviridae	405	5.0548e-06	0.000435749
Dengue virus 2	DENV-2	(+)ssRNA	Flaviviridae	138	1.60702e-05	0.00105813
Dengue virus 2	DENV-2	(+)ssRNA	Flaviviridae	118	0.000362553	0.0111454
Dengue virus 2	DENV-2	(+)ssRNA	Flaviviridae	390	0.00340378	0.043933
Dengue virus 2	DENV-2	(+)ssRNA	Flaviviridae	159	4.01015e-12	3.90789e-09
Dengue virus 2	DENV-2	(+)ssRNA	Flaviviridae	282	0.000324771	0.0103767
Dengue virus 2	DENV-2	(+)ssRNA	Flaviviridae	322	0.000324771	0.0103767
Dengue virus 2	DENV-2	(+)ssRNA	Flaviviridae	180	0.00196563	0.0321626
Dengue virus 2	DENV-2	(+)ssRNA	Flaviviridae	76	8.25603e-08	1.38716e-05
Dengue virus 2	DENV-2	(+)ssRNA	Flaviviridae	312	0.000324771	0.0103767
Dengue virus 2	DENV-2	(+)ssRNA	Flaviviridae	132	2.69721e-05	0.0016027
Dengue virus 2	DENV-2	(+)ssRNA	Flaviviridae	224	0.000901255	0.0203776
Dengue virus 2	DENV-2	(+)ssRNA	Flaviviridae	612	0.00104632	0.0223489
Dengue virus 2	DENV-2	(+)ssRNA	Flaviviridae	488	0.00201738	0.0321626
Dengue virus 2	DENV-2	(+)ssRNA	Flaviviridae	174	0.000155537	0.00610653
Dengue virus 2	DENV-2	(+)ssRNA	Flaviviridae	709	0.000434181	0.0124811
Dengue virus 2	DENV-2	(+)ssRNA	Flaviviridae	19	4.50436e-08	8.95815e-06
Dengue virus 2	DENV-2	(+)ssRNA	Flaviviridae	63	0.000364197	0.0111607
Dengue virus 2	DENV-2	(+)ssRNA	Flaviviridae	440	0.00201738	0.0321626
Dengue virus 2	DENV-2	(+)ssRNA	Flaviviridae	165	0.00196563	0.0321626
Dengue virus 2	DENV-2	(+)ssRNA	Flaviviridae	368	8.42972e-08	1.39233e-05
Dengue virus 2	DENV-2	(+)ssRNA	Flaviviridae	292	4.62333e-09	1.25151e-06
Dengue virus 2	DENV-2	(+)ssRNA	Flaviviridae	287	0.000324771	0.0103767
Dengue virus 2	DENV-2	(+)ssRNA	Flaviviridae	277	0.000324771	0.0103767
Dengue virus 2	DENV-2	(+)ssRNA	Flaviviridae	157	2.99695e-08	6.2139e-06
Dengue virus 2	DENV-2	(+)ssRNA	Flaviviridae	29	1.06561e-09	3.99398e-07
Dengue virus 2	DENV-2	(+)ssRNA	Flaviviridae	167	9.0227e-06	0.000680636
Ebola virus	EBOV	(-)ssRNA	Filoviridae	979	0.000752196	0.018189
Ebola virus	EBOV	(-)ssRNA	Filoviridae	432	0.00364342	0.045403
Ebola virus	EBOV	(-)ssRNA	Filoviridae	19	0.00224594	0.0343051
Ebola virus	EBOV	(-)ssRNA	Filoviridae	368	2.13366e-06	0.000225697
Ebola virus	EBOV	(-)ssRNA	Filoviridae	828	0.00148853	0.0269623
Ebola virus	EBOV	(-)ssRNA	Filoviridae	427	0.00364342	0.045403
Ebola virus	EBOV	(-)ssRNA	Filoviridae	157	2.43622e-08	5.40157e-06
Ebola virus	EBOV	(-)ssRNA	Filoviridae	95	0.000127897	0.00533169
Epstein-Barr virus	EBV	dsDNA	Herpesviridae	416	0.00417129	0.0487688
Epstein-Barr virus	EBV	dsDNA	Herpesviridae	7	0.00386632	0.0470966
Epstein-Barr virus	EBV	dsDNA	Herpesviridae	441	0.00417129	0.0487688
Epstein-Barr virus	EBV	dsDNA	Herpesviridae	123	0.00115429	0.0235819
Epstein-Barr virus	EBV	dsDNA	Herpesviridae	511	0.00218682	0.0337806
Epstein-Barr virus	EBV	dsDNA	Herpesviridae	93	0.00305089	0.04129
Epstein-Barr virus	EBV	dsDNA	Herpesviridae	447	0.00417129	0.0487688
Epstein-Barr virus	EBV	dsDNA	Herpesviridae	371	0.000448817	0.0127514
Epstein-Barr virus	EBV	dsDNA	Herpesviridae	466	0.00417129	0.0487688
Epstein-Barr virus	EBV	dsDNA	Herpesviridae	159	3.82903e-05	0.00200816
Epstein-Barr virus	EBV	dsDNA	Herpesviridae	457	0.00417129	0.0487688
Epstein-Barr virus	EBV	dsDNA	Herpesviridae	28	0.0030249	0.04129
Epstein-Barr virus	EBV	dsDNA	Herpesviridae	997	0.000240527	0.0083712
Epstein-Barr virus	EBV	dsDNA	Herpesviridae	709	0.000917306	0.0204533
Epstein-Barr virus	EBV	dsDNA	Herpesviridae	132	8.27671e-06	0.000645252
Epstein-Barr virus	EBV	dsDNA	Herpesviridae	94	0.00305089	0.04129
Epstein-Barr virus	EBV	dsDNA	Herpesviridae	725	0.000917306	0.0204533
Epstein-Barr virus	EBV	dsDNA	Herpesviridae	16	1.02335e-10	5.54031e-08
Epstein-Barr virus	EBV	dsDNA	Herpesviridae	167	4.94555e-11	2.92745e-08
Hepatitis C virus	HCV	(+)ssRNA	Flaviviridae	366	0.00386	0.0470785
Hepatitis C virus	HCV	(+)ssRNA	Flaviviridae	186	0.000191491	0.00706847
Hepatitis C virus	HCV	(+)ssRNA	Flaviviridae	8	0.000796942	0.0188386
Hepatitis C virus	HCV	(+)ssRNA	Flaviviridae	55	0.000787126	0.0188386
Hepatitis C virus	HCV	(+)ssRNA	Flaviviridae	71	0.00267428	0.0386087
Hepatitis C virus	HCV	(+)ssRNA	Flaviviridae	19	0.00159403	0.0284358
Hepatitis C virus	HCV	(+)ssRNA	Flaviviridae	292	0.000384787	0.0114671
Hepatitis C virus	HCV	(+)ssRNA	Flaviviridae	321	0.000384787	0.0114671
Hepatitis C virus	HCV	(+)ssRNA	Flaviviridae	109	0.000639431	0.0163122
Hepatitis C virus	HCV	(+)ssRNA	Flaviviridae	371	0.00386	0.0470785
Hepatitis C virus	HCV	(+)ssRNA	Flaviviridae	159	0.00231234	0.0349903
Hepatitis C virus	HCV	(+)ssRNA	Flaviviridae	1074	0.000128573	0.00533169
Hepatitis C virus	HCV	(+)ssRNA	Flaviviridae	709	0.000494865	0.0138179
Hepatitis C virus	HCV	(+)ssRNA	Flaviviridae	190	0.00160539	0.0284358
Human adenovirus C	HAdV	dsDNA	Adenoviridae	709	0.00103347	0.0221952
Human adenovirus C	HAdV	dsDNA	Adenoviridae	380	0.00352311	0.044646
Human adenovirus C	HAdV	dsDNA	Adenoviridae	496	0.00253868	0.0369797
Human adenovirus C	HAdV	dsDNA	Adenoviridae	132	1.40623e-08	3.34237e-06
Human adenovirus C	HAdV	dsDNA	Adenoviridae	672	0.00103347	0.0221952
Human adenovirus C	HAdV	dsDNA	Adenoviridae	63	0.000151384	0.00598324
Human cytomegalovirus	HCMV	dsDNA	Herpesviridae	335	0.00334917	0.0436327
Human cytomegalovirus	HCMV	dsDNA	Herpesviridae	16	0.000208254	0.00751641
Human cytomegalovirus	HCMV	dsDNA	Herpesviridae	704	0.0043452	0.0498635
Human cytomegalovirus	HCMV	dsDNA	Herpesviridae	915	0.00117971	0.0238018
Human cytomegalovirus	HCMV	dsDNA	Herpesviridae	956	0.00117971	0.0238018
Human cytomegalovirus	HCMV	dsDNA	Herpesviridae	997	0.00117971	0.0238018
Human cytomegalovirus	HCMV	dsDNA	Herpesviridae	625	0.000570148	0.0149323
Human cytomegalovirus	HCMV	dsDNA	Herpesviridae	262	0.00114791	0.0235203
Human cytomegalovirus	HCMV	dsDNA	Herpesviridae	656	0.0043452	0.0498635
Human cytomegalovirus	HCMV	dsDNA	Herpesviridae	1205	0.00117971	0.0238018
Human cytomegalovirus	HCMV	dsDNA	Herpesviridae	826	0.0043452	0.0498635
Human cytomegalovirus	HCMV	dsDNA	Herpesviridae	955	0.00117971	0.0238018
Human cytomegalovirus	HCMV	dsDNA	Herpesviridae	134	2.56946e-05	0.00153616
Human cytomegalovirus	HCMV	dsDNA	Herpesviridae	7	4.45497e-11	2.89425e-08
Human cytomegalovirus	HCMV	dsDNA	Herpesviridae	127	1.1444e-07	1.77019e-05
Human cytomegalovirus	HCMV	dsDNA	Herpesviridae	707	0.000124544	0.00530169
Human cytomegalovirus	HCMV	dsDNA	Herpesviridae	138	0.00123113	0.0242372
Human cytomegalovirus	HCMV	dsDNA	Herpesviridae	46	0.000683297	0.017096
Human cytomegalovirus	HCMV	dsDNA	Herpesviridae	292	1.06145e-06	0.000120277
Human cytomegalovirus	HCMV	dsDNA	Herpesviridae	108	3.10584e-07	4.08393e-05
Human cytomegalovirus	HCMV	dsDNA	Herpesviridae	660	0.0043452	0.0498635
Human cytomegalovirus	HCMV	dsDNA	Herpesviridae	1011	0.00117971	0.0238018
Human cytomegalovirus	HCMV	dsDNA	Herpesviridae	121	0.0019627	0.0321626
Human cytomegalovirus	HCMV	dsDNA	Herpesviridae	803	0.0043452	0.0498635
Human cytomegalovirus	HCMV	dsDNA	Herpesviridae	723	0.0043452	0.0498635
Human cytomegalovirus	HCMV	dsDNA	Herpesviridae	150	0.00123113	0.0242372
Human herpesvirus 1	HHV-1	dsDNA	Herpesviridae	264	0.000108204	0.00473262
Human herpesvirus 1	HHV-1	dsDNA	Herpesviridae	2	0.0024394	0.0362377
Human herpesvirus 1	HHV-1	dsDNA	Herpesviridae	936	0.00290955	0.0403896
Human herpesvirus 1	HHV-1	dsDNA	Herpesviridae	145	0.000555202	0.0147423
Human herpesvirus 1	HHV-1	dsDNA	Herpesviridae	41	0.000127889	0.00533169
Human herpesvirus 1	HHV-1	dsDNA	Herpesviridae	976	0.00290955	0.0403896
Human herpesvirus 1	HHV-1	dsDNA	Herpesviridae	292	2.52553e-08	5.46918e-06
Human herpesvirus 1	HHV-1	dsDNA	Herpesviridae	146	0.000555202	0.0147423
Human herpesvirus 1	HHV-1	dsDNA	Herpesviridae	890	0.00290955	0.0403896
Human herpesvirus 1	HHV-1	dsDNA	Herpesviridae	20	0.000603266	0.0155524
Human herpesvirus 1	HHV-1	dsDNA	Herpesviridae	979	0.00290955	0.0403896
Human herpesvirus 1	HHV-1	dsDNA	Herpesviridae	975	3.10969e-05	0.00175167
Human immunodeficiency virus 1	HIV-1	ssRNA-RT	Retroviridae	375	0.000693482	0.017096
Human immunodeficiency virus 1	HIV-1	ssRNA-RT	Retroviridae	63	0.00247694	0.0366836
Human immunodeficiency virus 1	HIV-1	ssRNA-RT	Retroviridae	74	0.00139684	0.0258296
Human immunodeficiency virus 1	HIV-1	ssRNA-RT	Retroviridae	16	0.000637493	0.0163054
Human immunodeficiency virus 1	HIV-1	ssRNA-RT	Retroviridae	277	0.0013104	0.0251375
Human immunodeficiency virus 1	HIV-1	ssRNA-RT	Retroviridae	202	0.000528864	0.0144769
Human immunodeficiency virus 1	HIV-1	ssRNA-RT	Retroviridae	558	0.00303743	0.04129
Human immunodeficiency virus 1	HIV-1	ssRNA-RT	Retroviridae	34	0.000481192	0.0135072
Human immunodeficiency virus 1	HIV-1	ssRNA-RT	Retroviridae	167	4.5667e-06	0.000404568
Human immunodeficiency virus 1	HIV-1	ssRNA-RT	Retroviridae	451	1.13534e-07	1.77019e-05
Human immunodeficiency virus 1	HIV-1	ssRNA-RT	Retroviridae	192	0.000528864	0.0144769
Human immunodeficiency virus 1	HIV-1	ssRNA-RT	Retroviridae	368	3.04687e-05	0.00172627
Human immunodeficiency virus 1	HIV-1	ssRNA-RT	Retroviridae	577	0.00303743	0.04129
Human immunodeficiency virus 1	HIV-1	ssRNA-RT	Retroviridae	746	0.00128159	0.02478
Human immunodeficiency virus 1	HIV-1	ssRNA-RT	Retroviridae	146	0.000127033	0.00533169
Human immunodeficiency virus 1	HIV-1	ssRNA-RT	Retroviridae	231	0.00030603	0.0101438
Human immunodeficiency virus 1	HIV-1	ssRNA-RT	Retroviridae	19	0.00235646	0.0354147
Human immunodeficiency virus 1	HIV-1	ssRNA-RT	Retroviridae	7	1.97542e-07	2.71133e-05
Human immunodeficiency virus 1	HIV-1	ssRNA-RT	Retroviridae	1089	0.000338034	0.0106999
Human immunodeficiency virus 1	HIV-1	ssRNA-RT	Retroviridae	28	0.000244571	0.00846012
Human immunodeficiency virus 1	HIV-1	ssRNA-RT	Retroviridae	292	5.92184e-08	1.06867e-05
Human immunodeficiency virus 1	HIV-1	ssRNA-RT	Retroviridae	88	0.000718897	0.0176021
Human immunodeficiency virus 1	HIV-1	ssRNA-RT	Retroviridae	511	0.00303743	0.04129
Human immunodeficiency virus 1	HIV-1	ssRNA-RT	Retroviridae	390	0.000693482	0.017096
Human immunodeficiency virus 1	HIV-1	ssRNA-RT	Retroviridae	576	0.00303743	0.04129
Human immunodeficiency virus 1	HIV-1	ssRNA-RT	Retroviridae	404	3.04687e-05	0.00172627
Human immunodeficiency virus 1	HIV-1	ssRNA-RT	Retroviridae	371	3.04687e-05	0.00172627
Human immunodeficiency virus 1	HIV-1	ssRNA-RT	Retroviridae	46	0.000202032	0.00731896
Human immunodeficiency virus 1	HIV-1	ssRNA-RT	Retroviridae	289	5.92184e-08	1.06867e-05
Human immunodeficiency virus 1	HIV-1	ssRNA-RT	Retroviridae	6	2.16127e-05	0.00132463
Human immunodeficiency virus 1	HIV-1	ssRNA-RT	Retroviridae	267	0.000162347	0.00627806
Human immunodeficiency virus 1	HIV-1	ssRNA-RT	Retroviridae	997	0.000338034	0.0106999
Human papillomavirus 11	HPV-11	dsDNA	Papillomaviridae	789	0.00216618	0.0336673
Human papillomavirus 11	HPV-11	dsDNA	Papillomaviridae	638	0.00216618	0.0336673
Human papillomavirus 11	HPV-11	dsDNA	Papillomaviridae	5	0.000778265	0.0187264
Human papillomavirus 11	HPV-11	dsDNA	Papillomaviridae	76	0.000417978	0.0122294
Human papillomavirus 11	HPV-11	dsDNA	Papillomaviridae	174	5.93955e-05	0.00287965
Human papillomavirus 11	HPV-11	dsDNA	Papillomaviridae	268	1.58291e-05	0.00104935
Human papillomavirus 11	HPV-11	dsDNA	Papillomaviridae	93	0.00394875	0.0477427
Human papillomavirus 11	HPV-11	dsDNA	Papillomaviridae	132	1.29361e-07	1.93943e-05
Human papillomavirus 11	HPV-11	dsDNA	Papillomaviridae	241	1.58291e-05	0.00104935
Human papillomavirus 11	HPV-11	dsDNA	Papillomaviridae	709	2.79878e-05	0.00165298
Human papillomavirus 11	HPV-11	dsDNA	Papillomaviridae	167	5.93955e-05	0.00287965
Human papillomavirus 11	HPV-11	dsDNA	Papillomaviridae	159	5.93955e-05	0.00287965
Human papillomavirus 11	HPV-11	dsDNA	Papillomaviridae	578	0.00356431	0.0449351
Human papillomavirus 11	HPV-11	dsDNA	Papillomaviridae	275	0.000369896	0.0112384
Human papillomavirus 16	HPV-16	dsDNA	Papillomaviridae	292	0.00249087	0.0367647
Human papillomavirus 16	HPV-16	dsDNA	Papillomaviridae	52	0.00134878	0.0255982
Human papillomavirus 16	HPV-16	dsDNA	Papillomaviridae	11	2.97916e-06	0.000296244
Human papillomavirus 16	HPV-16	dsDNA	Papillomaviridae	577	9.19289e-06	0.000680636
Human papillomavirus 16	HPV-16	dsDNA	Papillomaviridae	255	0.00363354	0.045396
Human papillomavirus 16	HPV-16	dsDNA	Papillomaviridae	167	2.91829e-13	3.55484e-10
Human papillomavirus 16	HPV-16	dsDNA	Papillomaviridae	180	0.000738388	0.0178995
Human papillomavirus 16	HPV-16	dsDNA	Papillomaviridae	100	0.00241121	0.0359835
Human papillomavirus 16	HPV-16	dsDNA	Papillomaviridae	143	7.02583e-05	0.00330757
Human papillomavirus 16	HPV-16	dsDNA	Papillomaviridae	48	2.16083e-06	0.000225697
Human papillomavirus 16	HPV-16	dsDNA	Papillomaviridae	58	0.000151653	0.00598324
Human papillomavirus 16	HPV-16	dsDNA	Papillomaviridae	1103	0.00403887	0.0480571
Human papillomavirus 16	HPV-16	dsDNA	Papillomaviridae	882	0.00403887	0.0480571
Human papillomavirus 16	HPV-16	dsDNA	Papillomaviridae	709	0.000199025	0.00726403
Human papillomavirus 16	HPV-16	dsDNA	Papillomaviridae	872	0.00403887	0.0480571
Human papillomavirus 16	HPV-16	dsDNA	Papillomaviridae	447	0.000940781	0.0207419
Human papillomavirus 16	HPV-16	dsDNA	Papillomaviridae	456	0.000940781	0.0207419
Human papillomavirus 16	HPV-16	dsDNA	Papillomaviridae	948	0.00403887	0.0480571
Human papillomavirus 16	HPV-16	dsDNA	Papillomaviridae	892	0.00403887	0.0480571
Human papillomavirus 16	HPV-16	dsDNA	Papillomaviridae	275	0.000117643	0.00509524
Human papillomavirus 18	HPV-18	dsDNA	Papillomaviridae	247	0.000119377	0.00514745
Human papillomavirus 18	HPV-18	dsDNA	Papillomaviridae	159	2.43888e-08	5.40157e-06
Human papillomavirus 18	HPV-18	dsDNA	Papillomaviridae	167	7.15312e-14	1.39414e-10
Human papillomavirus 18	HPV-18	dsDNA	Papillomaviridae	577	0.000319586	0.0103767
Human papillomavirus 18	HPV-18	dsDNA	Papillomaviridae	93	1.01192e-05	0.000735908
Human papillomavirus 18	HPV-18	dsDNA	Papillomaviridae	537	0.000319586	0.0103767
Human papillomavirus 18	HPV-18	dsDNA	Papillomaviridae	174	0.000433996	0.0124811
Human papillomavirus 18	HPV-18	dsDNA	Papillomaviridae	275	0.00166393	0.0292161
Human papillomavirus 18	HPV-18	dsDNA	Papillomaviridae	16	0.000130854	0.00538596
Human papillomavirus 18	HPV-18	dsDNA	Papillomaviridae	948	0.00305915	0.04129
Human papillomavirus 18	HPV-18	dsDNA	Papillomaviridae	255	0.0024362	0.0362377
Human papillomavirus 18	HPV-18	dsDNA	Papillomaviridae	268	0.0024362	0.0362377
Human papillomavirus 18	HPV-18	dsDNA	Papillomaviridae	709	0.000130987	0.00538596
Human papillomavirus 18	HPV-18	dsDNA	Papillomaviridae	872	0.00305915	0.04129
Human papillomavirus 18	HPV-18	dsDNA	Papillomaviridae	132	2.66783e-06	0.00026802
Human papillomavirus 18	HPV-18	dsDNA	Papillomaviridae	1205	0.00305915	0.04129
Human papillomavirus 18	HPV-18	dsDNA	Papillomaviridae	1103	0.00305915	0.04129
Human papillomavirus 31	HPV-31	dsDNA	Papillomaviridae	275	0.00114845	0.0235203
Human papillomavirus 31	HPV-31	dsDNA	Papillomaviridae	287	0.00114845	0.0235203
Human papillomavirus 31	HPV-31	dsDNA	Papillomaviridae	180	0.00414461	0.0487688
Human papillomavirus 31	HPV-31	dsDNA	Papillomaviridae	461	0.000428021	0.0124139
Human papillomavirus 31	HPV-31	dsDNA	Papillomaviridae	138	0.000375711	0.0112806
Human papillomavirus 31	HPV-31	dsDNA	Papillomaviridae	16	0.00048235	0.0135072
Human papillomavirus 31	HPV-31	dsDNA	Papillomaviridae	292	0.00114845	0.0235203
Human papillomavirus 31	HPV-31	dsDNA	Papillomaviridae	157	1.93632e-05	0.00122529
Human papillomavirus 31	HPV-31	dsDNA	Papillomaviridae	241	0.00168642	0.029452
Human papillomavirus 31	HPV-31	dsDNA	Papillomaviridae	322	4.1202e-05	0.0021343
Human papillomavirus 31	HPV-31	dsDNA	Papillomaviridae	167	0.000266065	0.00906576
Human papillomavirus 31	HPV-31	dsDNA	Papillomaviridae	219	0.00235856	0.0354147
Human papillomavirus 31	HPV-31	dsDNA	Papillomaviridae	224	0.00235856	0.0354147
Human papillomavirus 31	HPV-31	dsDNA	Papillomaviridae	440	0.000428021	0.0124139
Human papillomavirus 31	HPV-31	dsDNA	Papillomaviridae	1067	2.28193e-05	0.00137268
Human papillomavirus 31	HPV-31	dsDNA	Papillomaviridae	511	0.000218631	0.00780424
Human papillomavirus 31	HPV-31	dsDNA	Papillomaviridae	997	2.28193e-05	0.00137268
Human papillomavirus 31	HPV-31	dsDNA	Papillomaviridae	264	0.00168642	0.029452
Human papillomavirus 31	HPV-31	dsDNA	Papillomaviridae	19	0.00291655	0.0404293
Human papillomavirus 31	HPV-31	dsDNA	Papillomaviridae	910	0.00237253	0.0355698
Human papillomavirus 31	HPV-31	dsDNA	Papillomaviridae	159	0.000266065	0.00906576
Human papillomavirus 33	HPV-33	dsDNA	Papillomaviridae	335	0.00337892	0.0437286
Human papillomavirus 33	HPV-33	dsDNA	Papillomaviridae	65	0.00209392	0.0328058
Human papillomavirus 33	HPV-33	dsDNA	Papillomaviridae	789	0.000990622	0.0217424
Human papillomavirus 5	HPV-5	dsDNA	Papillomaviridae	447	0.00299923	0.0411654
Human papillomavirus 5	HPV-5	dsDNA	Papillomaviridae	682	0.00122288	0.0242214
Human papillomavirus 5	HPV-5	dsDNA	Papillomaviridae	241	0.000234475	0.00821929
Human papillomavirus 5	HPV-5	dsDNA	Papillomaviridae	71	0.00282939	0.0397871
Human papillomavirus 5	HPV-5	dsDNA	Papillomaviridae	789	0.00122288	0.0242214
Human papillomavirus 5	HPV-5	dsDNA	Papillomaviridae	374	0.00415899	0.0487688
Human papillomavirus 6b	HPV-6b	dsDNA	Papillomaviridae	717	0.00320669	0.0421125
Human papillomavirus 6b	HPV-6b	dsDNA	Papillomaviridae	709	5.07214e-05	0.00253477
Human papillomavirus 6b	HPV-6b	dsDNA	Papillomaviridae	174	2.70372e-09	8.23366e-07
Human papillomavirus 6b	HPV-6b	dsDNA	Papillomaviridae	132	4.17211e-07	5.08215e-05
Human papillomavirus 6b	HPV-6b	dsDNA	Papillomaviridae	180	0.00012837	0.00533169
Human papillomavirus 6b	HPV-6b	dsDNA	Papillomaviridae	241	3.45641e-05	0.00188172
Human papillomavirus 6b	HPV-6b	dsDNA	Papillomaviridae	638	0.00320669	0.0421125
Human papillomavirus 6b	HPV-6b	dsDNA	Papillomaviridae	159	2.70372e-09	8.23366e-07
Human papillomavirus 6b	HPV-6b	dsDNA	Papillomaviridae	194	0.00184995	0.0315723
Human papillomavirus 6b	HPV-6b	dsDNA	Papillomaviridae	268	8.17859e-07	9.37652e-05
Human papillomavirus 6b	HPV-6b	dsDNA	Papillomaviridae	5	0.00214867	0.0335021
Human papillomavirus 6b	HPV-6b	dsDNA	Papillomaviridae	872	1.29063e-05	0.000888118
Human papillomavirus 6b	HPV-6b	dsDNA	Papillomaviridae	577	0.000124586	0.00530169
Human papillomavirus 6b	HPV-6b	dsDNA	Papillomaviridae	1103	0.00162871	0.0287012
Human papillomavirus 6b	HPV-6b	dsDNA	Papillomaviridae	456	0.000244818	0.00846012
Human papillomavirus 6b	HPV-6b	dsDNA	Papillomaviridae	1160	0.00162871	0.0287012
Human papillomavirus 6b	HPV-6b	dsDNA	Papillomaviridae	873	1.29063e-05	0.000888118
Human papillomavirus 6b	HPV-6b	dsDNA	Papillomaviridae	93	3.43707e-05	0.0018817
Human papillomavirus 6b	HPV-6b	dsDNA	Papillomaviridae	705	0.00320669	0.0421125
Human papillomavirus 6b	HPV-6b	dsDNA	Papillomaviridae	275	0.00066179	0.0167946
Human papillomavirus 8	HPV-8	dsDNA	Papillomaviridae	789	0.00417875	0.0487688
Human papillomavirus 8	HPV-8	dsDNA	Papillomaviridae	969	0.00212728	0.0332751
Human papillomavirus 8	HPV-8	dsDNA	Papillomaviridae	734	0.00417875	0.0487688
Human papillomavirus 9	HPV-9	dsDNA	Papillomaviridae	789	0.00141729	0.0261086
Human papillomavirus 9	HPV-9	dsDNA	Papillomaviridae	462	0.00347085	0.0440409
Human papillomavirus 9	HPV-9	dsDNA	Papillomaviridae	447	0.00347085	0.0440409
Human papillomavirus 9	HPV-9	dsDNA	Papillomaviridae	540	0.00233788	0.0352673
Human respiratory syncytial virus	HRSV	(-)ssRNA	Pneumoviridae	709	0.00120419	0.0239873
Human respiratory syncytial virus	HRSV	(-)ssRNA	Pneumoviridae	387	0.00409634	0.0486815
Human respiratory syncytial virus	HRSV	(-)ssRNA	Pneumoviridae	70	7.55293e-06	0.000603306
Human respiratory syncytial virus	HRSV	(-)ssRNA	Pneumoviridae	1011	0.000607848	0.0155881
Human respiratory syncytial virus	HRSV	(-)ssRNA	Pneumoviridae	1160	0.000607848	0.0155881
Human respiratory syncytial virus	HRSV	(-)ssRNA	Pneumoviridae	22	1.1583e-17	3.76253e-14
Human respiratory syncytial virus	HRSV	(-)ssRNA	Pneumoviridae	638	0.00120419	0.0239873
Human respiratory syncytial virus	HRSV	(-)ssRNA	Pneumoviridae	159	0.000581382	0.015028
Human respiratory syncytial virus	HRSV	(-)ssRNA	Pneumoviridae	69	0.00276796	0.0390924
Human respiratory syncytial virus	HRSV	(-)ssRNA	Pneumoviridae	132	3.68172e-05	0.00196057
Human respiratory syncytial virus	HRSV	(-)ssRNA	Pneumoviridae	558	0.001988	0.0321626
Human respiratory syncytial virus	HRSV	(-)ssRNA	Pneumoviridae	431	0.00295383	0.0406568
Human respiratory syncytial virus	HRSV	(-)ssRNA	Pneumoviridae	592	0.001988	0.0321626
Influenza A virus (H1N1)	H1N1	(-)ssRNA	Orthomyxoviridae	322	6.49114e-08	1.12957e-05
Influenza A virus (H1N1)	H1N1	(-)ssRNA	Orthomyxoviridae	70	0.000368946	0.0112384
Influenza A virus (H1N1)	H1N1	(-)ssRNA	Orthomyxoviridae	7	1.56653e-06	0.00016962
Influenza A virus (H1N1)	H1N1	(-)ssRNA	Orthomyxoviridae	63	1.5584e-07	2.26665e-05
Influenza A virus (H1N1)	H1N1	(-)ssRNA	Orthomyxoviridae	447	0.0030985	0.0414765
Influenza A virus (H1N1)	H1N1	(-)ssRNA	Orthomyxoviridae	116	0.000182455	0.00678634
Influenza A virus (H1N1)	H1N1	(-)ssRNA	Orthomyxoviridae	132	9.5781e-05	0.00428159
Influenza A virus (H1N1)	H1N1	(-)ssRNA	Orthomyxoviridae	19	4.23932e-18	2.06561e-14
Influenza A virus (H1N1)	H1N1	(-)ssRNA	Orthomyxoviridae	292	3.66089e-06	0.000333415
Influenza A virus (H1N1)	H1N1	(-)ssRNA	Orthomyxoviridae	167	5.34291e-08	1.02092e-05
Influenza A virus (H1N1)	H1N1	(-)ssRNA	Orthomyxoviridae	217	0.000542297	0.0145875
Influenza A virus (H1N1)	H1N1	(-)ssRNA	Orthomyxoviridae	547	3.22724e-05	0.00179711
Influenza A virus (H1N1)	H1N1	(-)ssRNA	Orthomyxoviridae	159	1.99913e-05	0.00125688
Influenza A virus (H1N1)	H1N1	(-)ssRNA	Orthomyxoviridae	76	3.20569e-05	0.00179537
Influenza A virus (H1N1)	H1N1	(-)ssRNA	Orthomyxoviridae	221	0.000542297	0.0145875
Influenza A virus (H1N1)	H1N1	(-)ssRNA	Orthomyxoviridae	567	0.00114834	0.0235203
Influenza A virus (H1N1)	H1N1	(-)ssRNA	Orthomyxoviridae	98	0.000545058	0.0145875
Influenza A virus (H1N1)	H1N1	(-)ssRNA	Orthomyxoviridae	1011	0.00202186	0.0321626
Influenza A virus (H1N1)	H1N1	(-)ssRNA	Orthomyxoviridae	157	7.94293e-09	2.03694e-06
Influenza A virus (H1N1)	H1N1	(-)ssRNA	Orthomyxoviridae	1178	0.00202186	0.0321626
Influenza A virus (H1N1)	H1N1	(-)ssRNA	Orthomyxoviridae	356	0.000542806	0.0145875
Influenza A virus (H1N1)	H1N1	(-)ssRNA	Orthomyxoviridae	905	0.00202186	0.0321626
Influenza A virus (H1N1)	H1N1	(-)ssRNA	Orthomyxoviridae	46	0.00248615	0.0367641
Influenza A virus (H1N1)	H1N1	(-)ssRNA	Orthomyxoviridae	979	0.00202186	0.0321626
Influenza A virus (H1N1)	H1N1	(-)ssRNA	Orthomyxoviridae	1093	0.00202186	0.0321626
Influenza A virus (H1N1)	H1N1	(-)ssRNA	Orthomyxoviridae	192	0.00106529	0.0226172
Influenza A virus (H1N1)	H1N1	(-)ssRNA	Orthomyxoviridae	1144	0.00202186	0.0321626
Influenza A virus (H1N1)	H1N1	(-)ssRNA	Orthomyxoviridae	267	1.46586e-05	0.000985158
Influenza A virus (H1N1)	H1N1	(-)ssRNA	Orthomyxoviridae	264	5.18698e-07	6.16428e-05
Influenza A virus (H1N1)	H1N1	(-)ssRNA	Orthomyxoviridae	321	6.49114e-08	1.12957e-05
Influenza A virus (H1N1)	H1N1	(-)ssRNA	Orthomyxoviridae	451	0.000173259	0.00651894
Influenza A virus (H1N1)	H1N1	(-)ssRNA	Orthomyxoviridae	146	0.000439095	0.0125748
Influenza A virus (H1N1)	H1N1	(-)ssRNA	Orthomyxoviridae	965	0.00202186	0.0321626
Influenza A virus (H1N1)	H1N1	(-)ssRNA	Orthomyxoviridae	1078	0.00202186	0.0321626
Influenza A virus (H1N1)	H1N1	(-)ssRNA	Orthomyxoviridae	405	0.000542806	0.0145875
Influenza A virus (H1N1)	H1N1	(-)ssRNA	Orthomyxoviridae	158	0.00190306	0.0317557
Influenza A virus (H1N1)	H1N1	(-)ssRNA	Orthomyxoviridae	614	0.00114834	0.0235203
Influenza A virus (H1N1)	H1N1	(-)ssRNA	Orthomyxoviridae	972	0.00202186	0.0321626
Influenza A virus (H1N1)	H1N1	(-)ssRNA	Orthomyxoviridae	462	0.000173259	0.00651894
Influenza A virus (H1N1)	H1N1	(-)ssRNA	Orthomyxoviridae	440	0.000173259	0.00651894
Influenza A virus (H1N1)	H1N1	(-)ssRNA	Orthomyxoviridae	1092	0.00202186	0.0321626
Influenza A virus (H1N1)	H1N1	(-)ssRNA	Orthomyxoviridae	914	0.00202186	0.0321626
Influenza A virus (H1N1)	H1N1	(-)ssRNA	Orthomyxoviridae	34	0.00154995	0.0278691
Influenza A virus (H1N1)	H1N1	(-)ssRNA	Orthomyxoviridae	6	1.85977e-08	4.31511e-06
Influenza A virus (H1N1)	H1N1	(-)ssRNA	Orthomyxoviridae	303	3.66089e-06	0.000333415
Influenza A virus (H1N1)	H1N1	(-)ssRNA	Orthomyxoviridae	174	0.000227529	0.00808608
Influenza A virus (H1N1)	H1N1	(-)ssRNA	Orthomyxoviridae	416	0.0030985	0.0414765
Influenza A virus (H1N1)	H1N1	(-)ssRNA	Orthomyxoviridae	293	0.00129619	0.0249434
Influenza A virus (H1N1)	H1N1	(-)ssRNA	Orthomyxoviridae	145	4.61863e-05	0.00233205
Influenza A virus (H1N1)	H1N1	(-)ssRNA	Orthomyxoviridae	290	0.00129619	0.0249434
Influenza A virus (H1N1)	H1N1	(-)ssRNA	Orthomyxoviridae	121	8.99032e-06	0.000680636
Influenza A virus (H1N1)	H1N1	(-)ssRNA	Orthomyxoviridae	16	4.07195e-07	5.08215e-05
Influenza A virus (H1N1)	H1N1	(-)ssRNA	Orthomyxoviridae	511	0.00114834	0.0235203
Influenza A virus (H1N1)	H1N1	(-)ssRNA	Orthomyxoviridae	289	3.66089e-06	0.000333415
Influenza A virus (H1N1)	H1N1	(-)ssRNA	Orthomyxoviridae	312	9.07762e-05	0.00410563
Influenza A virus (H1N1)	H1N1	(-)ssRNA	Orthomyxoviridae	138	1.88416e-10	8.34598e-08
Influenza A virus (H3N2)	H3N2	(-)ssRNA	Orthomyxoviridae	1066	0.00345333	0.043933
Influenza A virus (H3N2)	H3N2	(-)ssRNA	Orthomyxoviridae	19	1.7957e-07	2.5734e-05
Influenza A virus (H3N2)	H3N2	(-)ssRNA	Orthomyxoviridae	7	5.25645e-05	0.00260021
Influenza A virus (H3N2)	H3N2	(-)ssRNA	Orthomyxoviridae	157	2.04828e-09	6.65349e-07
Influenza A virus (H3N2)	H3N2	(-)ssRNA	Orthomyxoviridae	6	0.00293616	0.0405581
Influenza A virus (H3N2)	H3N2	(-)ssRNA	Orthomyxoviridae	828	0.00015721	0.00612803
Influenza A virus (H3N2)	H3N2	(-)ssRNA	Orthomyxoviridae	138	7.81758e-08	1.33653e-05
Influenza A virus (H3N2)	H3N2	(-)ssRNA	Orthomyxoviridae	869	0.00345333	0.043933
Influenza A virus (H3N2)	H3N2	(-)ssRNA	Orthomyxoviridae	405	0.0012728	0.0247081
Influenza A virus (H3N2)	H3N2	(-)ssRNA	Orthomyxoviridae	118	0.00104807	0.0223489
Influenza A virus (H3N2)	H3N2	(-)ssRNA	Orthomyxoviridae	322	2.41794e-06	0.00024803
Influenza A virus (H3N2)	H3N2	(-)ssRNA	Orthomyxoviridae	289	0.00198463	0.0321626
Influenza A virus (H3N2)	H3N2	(-)ssRNA	Orthomyxoviridae	264	0.000151342	0.00598324
Influenza A virus (H5N1)	H5N1	(-)ssRNA	Orthomyxoviridae	725	0.00203306	0.0321626
Influenza A virus (H5N1)	H5N1	(-)ssRNA	Orthomyxoviridae	932	0.00102924	0.0221952
Influenza A virus (H5N1)	H5N1	(-)ssRNA	Orthomyxoviridae	322	7.8655e-06	0.000619922
Influenza A virus (H5N1)	H5N1	(-)ssRNA	Orthomyxoviridae	547	6.26808e-05	0.00297963
Influenza A virus (H5N1)	H5N1	(-)ssRNA	Orthomyxoviridae	664	0.00203306	0.0321626
Influenza A virus (H5N1)	H5N1	(-)ssRNA	Orthomyxoviridae	614	0.00334664	0.0436327
Influenza A virus (H5N1)	H5N1	(-)ssRNA	Orthomyxoviridae	98	0.00360849	0.0452658
Influenza A virus (H5N1)	H5N1	(-)ssRNA	Orthomyxoviridae	173	5.24195e-05	0.00260021
Influenza A virus (H5N1)	H5N1	(-)ssRNA	Orthomyxoviridae	264	1.39495e-05	0.000944012
Influenza A virus (H5N1)	H5N1	(-)ssRNA	Orthomyxoviridae	646	0.00203306	0.0321626
Influenza A virus (H5N1)	H5N1	(-)ssRNA	Orthomyxoviridae	19	7.72254e-16	1.8814e-12
Influenza A virus (H5N1)	H5N1	(-)ssRNA	Orthomyxoviridae	157	1.60754e-11	1.11896e-08
Influenza A virus (H5N1)	H5N1	(-)ssRNA	Orthomyxoviridae	416	0.000123625	0.00530169
Influenza A virus (H5N1)	H5N1	(-)ssRNA	Orthomyxoviridae	405	0.000213351	0.00764375
Influenza A virus (H5N1)	H5N1	(-)ssRNA	Orthomyxoviridae	138	2.50204e-06	0.000253983
Influenza A virus (H5N1)	H5N1	(-)ssRNA	Orthomyxoviridae	186	0.00125105	0.0244318
Influenza A virus (H5N1)	H5N1	(-)ssRNA	Orthomyxoviridae	828	0.00203306	0.0321626
Influenza A virus (H5N1)	H5N1	(-)ssRNA	Orthomyxoviridae	161	0.00125105	0.0244318
Kaposi's sarcoma-associated herpesvirus	KSHV	dsDNA	Herpesviridae	186	0.000919296	0.0204533
Kaposi's sarcoma-associated herpesvirus	KSHV	dsDNA	Herpesviridae	7	6.32262e-10	2.46456e-07
Kaposi's sarcoma-associated herpesvirus	KSHV	dsDNA	Herpesviridae	910	6.09751e-05	0.00291276
Kaposi's sarcoma-associated herpesvirus	KSHV	dsDNA	Herpesviridae	291	0.00294249	0.0405581
Kaposi's sarcoma-associated herpesvirus	KSHV	dsDNA	Herpesviridae	76	0.000687745	0.017096
Kaposi's sarcoma-associated herpesvirus	KSHV	dsDNA	Herpesviridae	262	0.00428509	0.0498635
Kaposi's sarcoma-associated herpesvirus	KSHV	dsDNA	Herpesviridae	1052	6.09751e-05	0.00291276
Kaposi's sarcoma-associated herpesvirus	KSHV	dsDNA	Herpesviridae	150	9.26937e-05	0.00416267
Kaposi's sarcoma-associated herpesvirus	KSHV	dsDNA	Herpesviridae	58	2.02319e-05	0.00126385
Kaposi's sarcoma-associated herpesvirus	KSHV	dsDNA	Herpesviridae	581	0.000574412	0.0149323
Kaposi's sarcoma-associated herpesvirus	KSHV	dsDNA	Herpesviridae	365	0.00189438	0.0316741
Kaposi's sarcoma-associated herpesvirus	KSHV	dsDNA	Herpesviridae	29	0.00138318	0.0256256
Kaposi's sarcoma-associated herpesvirus	KSHV	dsDNA	Herpesviridae	267	0.00428509	0.0498635
Kaposi's sarcoma-associated herpesvirus	KSHV	dsDNA	Herpesviridae	287	0.00294249	0.0405581
Kaposi's sarcoma-associated herpesvirus	KSHV	dsDNA	Herpesviridae	48	0.00258371	0.0374676
Kaposi's sarcoma-associated herpesvirus	KSHV	dsDNA	Herpesviridae	129	0.00174554	0.0300534
Lymphocytic choriomeningitis virus	LCMV	(-)ssRNA	Arenaviridae	200	0.00106135	0.0225826
Lymphocytic choriomeningitis virus	LCMV	(-)ssRNA	Arenaviridae	960	0.00110964	0.0234402
Lymphocytic choriomeningitis virus	LCMV	(-)ssRNA	Arenaviridae	146	8.63863e-05	0.00395227
Lymphocytic choriomeningitis virus	LCMV	(-)ssRNA	Arenaviridae	511	0.00360457	0.0452658
Lymphocytic choriomeningitis virus	LCMV	(-)ssRNA	Arenaviridae	725	0.0021908	0.0337806
Lymphocytic choriomeningitis virus	LCMV	(-)ssRNA	Arenaviridae	145	8.63863e-05	0.00395227
Lymphocytic choriomeningitis virus	LCMV	(-)ssRNA	Arenaviridae	322	0.000376158	0.0112806
Lymphocytic choriomeningitis virus	LCMV	(-)ssRNA	Arenaviridae	63	4.19e-05	0.00214903
Lymphocytic choriomeningitis virus	LCMV	(-)ssRNA	Arenaviridae	979	7.22189e-06	0.000586477
Lymphocytic choriomeningitis virus	LCMV	(-)ssRNA	Arenaviridae	664	0.0021908	0.0337806
Lymphocytic choriomeningitis virus	LCMV	(-)ssRNA	Arenaviridae	264	3.1431e-07	4.08393e-05
Lymphocytic choriomeningitis virus	LCMV	(-)ssRNA	Arenaviridae	303	1.377e-09	4.96995e-07
Lymphocytic choriomeningitis virus	LCMV	(-)ssRNA	Arenaviridae	727	0.0021908	0.0337806
Lymphocytic choriomeningitis virus	LCMV	(-)ssRNA	Arenaviridae	637	0.0021908	0.0337806
Lymphocytic choriomeningitis virus	LCMV	(-)ssRNA	Arenaviridae	292	7.61814e-12	6.26331e-09
Lymphocytic choriomeningitis virus	LCMV	(-)ssRNA	Arenaviridae	290	9.13402e-06	0.000680636
Lymphocytic choriomeningitis virus	LCMV	(-)ssRNA	Arenaviridae	440	0.000138287	0.00563853
Measles virus	MV	(-)ssRNA	Paramyxoviridae	159	7.48202e-06	0.000602581
Measles virus	MV	(-)ssRNA	Paramyxoviridae	2	0.00311747	0.0415385
Measles virus	MV	(-)ssRNA	Paramyxoviridae	132	1.81233e-05	0.00116586
Measles virus	MV	(-)ssRNA	Paramyxoviridae	709	4.30608e-07	5.18059e-05
Measles virus	MV	(-)ssRNA	Paramyxoviridae	277	0.000857543	0.019664
Measles virus	MV	(-)ssRNA	Paramyxoviridae	292	7.47517e-09	1.9688e-06
Measles virus	MV	(-)ssRNA	Paramyxoviridae	979	1.68636e-05	0.00109557
Measles virus	MV	(-)ssRNA	Paramyxoviridae	29	0.0012449	0.0244318
Measles virus	MV	(-)ssRNA	Paramyxoviridae	226	0.00176836	0.0303393
Measles virus	MV	(-)ssRNA	Paramyxoviridae	972	0.0019433	0.0321626
Measles virus	MV	(-)ssRNA	Paramyxoviridae	725	0.00382043	0.0467715
Measles virus	MV	(-)ssRNA	Paramyxoviridae	76	0.00122772	0.0242372
Measles virus	MV	(-)ssRNA	Paramyxoviridae	869	0.0019433	0.0321626
Measles virus	MV	(-)ssRNA	Paramyxoviridae	289	0.000857543	0.019664
Measles virus	MV	(-)ssRNA	Paramyxoviridae	174	0.00312018	0.0415385
Measles virus	MV	(-)ssRNA	Paramyxoviridae	158	0.00312018	0.0415385
Measles virus	MV	(-)ssRNA	Paramyxoviridae	145	0.00397945	0.0479947
Measles virus	MV	(-)ssRNA	Paramyxoviridae	62	0.000201112	0.00731281
Measles virus	MV	(-)ssRNA	Paramyxoviridae	167	0.00312018	0.0415385
Measles virus	MV	(-)ssRNA	Paramyxoviridae	558	0.000162243	0.00627806
Measles virus	MV	(-)ssRNA	Paramyxoviridae	77	2.72699e-07	3.64034e-05
Measles virus	MV	(-)ssRNA	Paramyxoviridae	368	0.000546375	0.0145875
MERS-CoV	MERS-CoV	(+)ssRNA	Coronaviridae	1178	0.000805374	0.0188386
MERS-CoV	MERS-CoV	(+)ssRNA	Coronaviridae	977	0.000805374	0.0188386
MERS-CoV	MERS-CoV	(+)ssRNA	Coronaviridae	1214	0.000805374	0.0188386
MERS-CoV	MERS-CoV	(+)ssRNA	Coronaviridae	157	1.3659e-06	0.000151258
MERS-CoV	MERS-CoV	(+)ssRNA	Coronaviridae	267	0.000347128	0.0107389
MERS-CoV	MERS-CoV	(+)ssRNA	Coronaviridae	474	0.00389664	0.0472886
MERS-CoV	MERS-CoV	(+)ssRNA	Coronaviridae	577	4.34076e-05	0.0022147
MERS-CoV	MERS-CoV	(+)ssRNA	Coronaviridae	636	0.00159317	0.0284358
MERS-CoV	MERS-CoV	(+)ssRNA	Coronaviridae	997	0.000805374	0.0188386
MERS-CoV	MERS-CoV	(+)ssRNA	Coronaviridae	538	3.58667e-07	4.53923e-05
MERS-CoV	MERS-CoV	(+)ssRNA	Coronaviridae	428	0.00389664	0.0472886
MERS-CoV	MERS-CoV	(+)ssRNA	Coronaviridae	95	0.00014595	0.00589
MERS-CoV	MERS-CoV	(+)ssRNA	Coronaviridae	46	0.000699132	0.0171613
MERS-CoV	MERS-CoV	(+)ssRNA	Coronaviridae	646	0.00159317	0.0284358
MERS-CoV	MERS-CoV	(+)ssRNA	Coronaviridae	186	0.000876315	0.0199525
MERS-CoV	MERS-CoV	(+)ssRNA	Coronaviridae	104	0.000113072	0.00491915
SARS-CoV-1	SARS-CoV-1	(+)ssRNA	Coronaviridae	167	0.000146268	0.00589
SARS-CoV-1	SARS-CoV-1	(+)ssRNA	Coronaviridae	965	0.000108299	0.00473262
SARS-CoV-1	SARS-CoV-1	(+)ssRNA	Coronaviridae	150	0.0026046	0.0377145
SARS-CoV-1	SARS-CoV-1	(+)ssRNA	Coronaviridae	331	4.74082e-06	0.00041621
SARS-CoV-1	SARS-CoV-1	(+)ssRNA	Coronaviridae	161	0.00187345	0.0316741
SARS-CoV-1	SARS-CoV-1	(+)ssRNA	Coronaviridae	108	1.24254e-07	1.89196e-05
SARS-CoV-1	SARS-CoV-1	(+)ssRNA	Coronaviridae	289	4.22188e-09	1.17549e-06
SARS-CoV-1	SARS-CoV-1	(+)ssRNA	Coronaviridae	27	0.00362354	0.0453291
SARS-CoV-1	SARS-CoV-1	(+)ssRNA	Coronaviridae	16	0.00136344	0.0255982
SARS-CoV-1	SARS-CoV-1	(+)ssRNA	Coronaviridae	146	0.000228362	0.00808608
SARS-CoV-1	SARS-CoV-1	(+)ssRNA	Coronaviridae	268	0.000535042	0.0145875
SARS-CoV-1	SARS-CoV-1	(+)ssRNA	Coronaviridae	184	0.00187345	0.0316741
SARS-CoV-1	SARS-CoV-1	(+)ssRNA	Coronaviridae	346	0.00327965	0.0428421
SARS-CoV-1	SARS-CoV-1	(+)ssRNA	Coronaviridae	194	0.00129772	0.0249434
SARS-CoV-1	SARS-CoV-1	(+)ssRNA	Coronaviridae	174	0.000146268	0.00589
SARS-CoV-1	SARS-CoV-1	(+)ssRNA	Coronaviridae	319	1.21434e-05	0.000857515
SARS-CoV-2	SARS-CoV-2	(+)ssRNA	Coronaviridae	965	0.000376214	0.0112806
SARS-CoV-2	SARS-CoV-2	(+)ssRNA	Coronaviridae	108	3.88007e-05	0.00202199
SARS-CoV-2	SARS-CoV-2	(+)ssRNA	Coronaviridae	530	0.00336704	0.0436327
SARS-CoV-2	SARS-CoV-2	(+)ssRNA	Coronaviridae	237	0.000192351	0.00707344
SARS-CoV-2	SARS-CoV-2	(+)ssRNA	Coronaviridae	224	0.00399827	0.0480571
SARS-CoV-2	SARS-CoV-2	(+)ssRNA	Coronaviridae	70	0.00225525	0.0343552
SARS-CoV-2	SARS-CoV-2	(+)ssRNA	Coronaviridae	267	3.19944e-07	4.10244e-05
SARS-CoV-2	SARS-CoV-2	(+)ssRNA	Coronaviridae	596	0.00336704	0.0436327
SARS-CoV-2	SARS-CoV-2	(+)ssRNA	Coronaviridae	321	9.09141e-05	0.00410563
SARS-CoV-2	SARS-CoV-2	(+)ssRNA	Coronaviridae	291	0.00149864	0.0270449
SARS-CoV-2	SARS-CoV-2	(+)ssRNA	Coronaviridae	104	0.00434953	0.0498635
SARS-CoV-2	SARS-CoV-2	(+)ssRNA	Coronaviridae	577	0.00336704	0.0436327
SARS-CoV-2	SARS-CoV-2	(+)ssRNA	Coronaviridae	1178	0.000376214	0.0112806
SARS-CoV-2	SARS-CoV-2	(+)ssRNA	Coronaviridae	43	4.47845e-06	0.00040039
SARS-CoV-2	SARS-CoV-2	(+)ssRNA	Coronaviridae	62	0.00383296	0.046866
SARS-CoV-2	SARS-CoV-2	(+)ssRNA	Coronaviridae	319	0.00149864	0.0270449
SARS-CoV-2	SARS-CoV-2	(+)ssRNA	Coronaviridae	390	0.000794778	0.0188386
SARS-CoV-2	SARS-CoV-2	(+)ssRNA	Coronaviridae	375	0.000794778	0.0188386
SARS-CoV-2	SARS-CoV-2	(+)ssRNA	Coronaviridae	5	0.000647411	0.0164726
SARS-CoV-2	SARS-CoV-2	(+)ssRNA	Coronaviridae	174	0.00100601	0.021981
SARS-CoV-2	SARS-CoV-2	(+)ssRNA	Coronaviridae	716	0.00142349	0.0261734
SARS-CoV-2	SARS-CoV-2	(+)ssRNA	Coronaviridae	170	0.00100601	0.021981
SARS-CoV-2	SARS-CoV-2	(+)ssRNA	Coronaviridae	553	0.00336704	0.0436327
Vaccinia virus	VACV	dsDNA	Poxviridae	815	0.00145779	0.0264548
Vaccinia virus	VACV	dsDNA	Poxviridae	498	0.00356899	0.0449351
Vaccinia virus	VACV	dsDNA	Poxviridae	678	0.00145779	0.0264548
Vaccinia virus	VACV	dsDNA	Poxviridae	459	0.00356899	0.0449351
Vaccinia virus	VACV	dsDNA	Poxviridae	990	0.000736582	0.0178995
Vaccinia virus	VACV	dsDNA	Poxviridae	440	0.00356899	0.0449351
Vaccinia virus	VACV	dsDNA	Poxviridae	36	1.53148e-07	2.26125e-05
Vaccinia virus	VACV	dsDNA	Poxviridae	79	0.00266103	0.0384743
Vaccinia virus	VACV	dsDNA	Poxviridae	725	0.00145779	0.0264548
Zika virus	ZIKV	(+)ssRNA	Flaviviridae	95	0.000725049	0.0177083
Zika virus	ZIKV	(+)ssRNA	Flaviviridae	709	4.11037e-06	0.000370885
Zika virus	ZIKV	(+)ssRNA	Flaviviridae	134	0.00286143	0.0401394
Zika virus	ZIKV	(+)ssRNA	Flaviviridae	268	6.18155e-07	7.2044e-05
Zika virus	ZIKV	(+)ssRNA	Flaviviridae	146	1.08038e-05	0.000774139
Zika virus	ZIKV	(+)ssRNA	Flaviviridae	29	1.31307e-19	1.27959e-15
Zika virus	ZIKV	(+)ssRNA	Flaviviridae	289	0.00431758	0.0498635
Zika virus	ZIKV	(+)ssRNA	Flaviviridae	19	2.16706e-06	0.000225697
Zika virus	ZIKV	(+)ssRNA	Flaviviridae	145	0.000175328	0.00657143
Zika virus	ZIKV	(+)ssRNA	Flaviviridae	57	4.81118e-05	0.00241675
Zika virus	ZIKV	(+)ssRNA	Flaviviridae	108	2.9152e-05	0.00169099
Zika virus	ZIKV	(+)ssRNA	Flaviviridae	264	1.43316e-10	6.6898e-08
Zika virus	ZIKV	(+)ssRNA	Flaviviridae	319	0.000248648	0.00856209
Zika virus	ZIKV	(+)ssRNA	Flaviviridae	405	3.59122e-06	0.000333415
Zika virus	ZIKV	(+)ssRNA	Flaviviridae	76	0.00126389	0.0245891
Zika virus	ZIKV	(+)ssRNA	Flaviviridae	322	2.14265e-07	2.90002e-05
Zika virus	ZIKV	(+)ssRNA	Flaviviridae	716	0.000353457	0.0109001
Zika virus	ZIKV	(+)ssRNA	Flaviviridae	249	0.000431589	0.0124802
Zika virus	ZIKV	(+)ssRNA	Flaviviridae	287	9.21949e-06	0.000680636
Zika virus	ZIKV	(+)ssRNA	Flaviviridae	159	1.44162e-10	6.6898e-08
Zika virus	ZIKV	(+)ssRNA	Flaviviridae	118	1.81848e-05	0.00116586
Zika virus	ZIKV	(+)ssRNA	Flaviviridae	290	0.00431758	0.0498635
Zika virus	ZIKV	(+)ssRNA	Flaviviridae	547	1.84538e-07	2.57977e-05
Zika virus	ZIKV	(+)ssRNA	Flaviviridae	157	8.35537e-12	6.26331e-09
Zika virus	ZIKV	(+)ssRNA	Flaviviridae	138	8.35537e-12	6.26331e-09
Zika virus	ZIKV	(+)ssRNA	Flaviviridae	6	0.000832894	0.0193195

## Sheet: CoV-targets_in_domain
Category	Gene	Domain_Id	Domain_num
MERS-CoV	ATP6V1B2	j,m,p	3
MERS-CoV	DCP1A	m	1
MERS-CoV	DIS3L	c,i,j,l,m	5
MERS-CoV	LATS1	f,j,m,o,p	5
MERS-CoV	POP4	j,l	2
MERS-CoV	TCF3	j,l,m	3
MERS-CoV	VAMP8	b,p	2
SARS-CoV-1	EIF3J	l	1
SARS-CoV-1	ERBB3	e,j,m,p	4
SARS-CoV-1	HAVCR1	e,p	2
SARS-CoV-1	PAM16	p	1
SARS-CoV-1	RAD17	h,j	2
SARS-CoV-1	TNRC6C	j,l,m	3
SARS-CoV-1	WBP2	m,p	2
SARS-CoV-2	ACVR2A	a,j	2
SARS-CoV-2	BMPR1B	a,j	2
SARS-CoV-2	CDK12	g	1
SARS-CoV-2	EXOSC2	c,j,l,m	4
SARS-CoV-2	IBTK	e,j,m,o,p	5
SARS-CoV-2	JAK2	e,i,j,l,m,p	6
SARS-CoV-2	LGR4	m	1
SARS-CoV-2	PPP2R2C	d,j,m,p	4
SARS-CoV-2	PRPF40A	j	1
SARS-CoV-2	RHOB	e	1
SARS-CoV-2	ROR1	e,p	2
SARS-CoV-2	SYMPK	j,m	2
SARS-CoV-2	TAF2	i,j	2
SARS-CoV-2	UBE2J1	n	1
SARS-CoV-2 & SARS-CoV-1	ACVR1	a,e,j	3
SARS-CoV-2 & SARS-CoV-1	ACVR1B	a	1
SARS-CoV-2 & SARS-CoV-1	BAMBI	j	1
SARS-CoV-2 & SARS-CoV-1	BMPR1A	a,j	2
SARS-CoV-2 & SARS-CoV-1	MUL1	f,m,o,p	4
SARS-CoV-2 & SARS-CoV-1	PRIM1	h,j	2
SARS-CoV-2 & SARS-CoV-1	PTPRJ	e,p	2
SARS-CoV-2 & SARS-CoV-1	SNAP25	b	1
SARS-CoV-2 & SARS-CoV-1	STAM2	e	1
SARS-CoV-2 & SARS-CoV-1	VAMP4	b	1
SARS-CoV-2 & SARS-CoV-1	ZDHHC18	e,j,m,p	4
CoV-pan	CDK5RAP2	e	1
CoV-pan	USP13	m	1
CoV & Others	AATF	i,j	2
CoV & Others	ACLY	j,l,m,p	4
CoV & Others	ADAM9	e	1
CoV & Others	AHR	g,i,j,k,m	5
CoV & Others	AKAP8	h,j,m	3
CoV & Others	AMBRA1	f,j,m,n,o,p	6
CoV & Others	AMFR	m,n,o	3
CoV & Others	ANXA6	e	1
CoV & Others	AP2A1	e	1
CoV & Others	AP2A2	e	1
CoV & Others	AP2M1	e,p	2
CoV & Others	ARHGEF2	e,m,p	3
CoV & Others	ARNT	i,j,m,p	4
CoV & Others	ATM	h,i,j,k,m	5
CoV & Others	ATR	f,h,i,j,k,m	6
CoV & Others	B2M	m	1
CoV & Others	BAG3	j	1
CoV & Others	BAG6	m,n	2
CoV & Others	BLM	h,i,j,k,m	5
CoV & Others	BMPR2	a	1
CoV & Others	BNIP3L	o,p	2
CoV & Others	CALD1	j	1
CoV & Others	CAND1	f,m	2
CoV & Others	CAPRIN1	i,j,k,l,m	5
CoV & Others	CARM1	i,j,m	3
CoV & Others	CAV1	f,m,p	3
CoV & Others	CCAR2	i,j,k,l,m	5
CoV & Others	CCNT1	g,i,j,m	4
CoV & Others	CD44	e,p	2
CoV & Others	CD81	e,p	2
CoV & Others	CDK4	h,i,j,k,m	5
CoV & Others	CKB	f,m	2
CoV & Others	CLINT1	e	1
CoV & Others	CLIP1	e	1
CoV & Others	COMMD1	m	1
CoV & Others	COPS4	m	1
CoV & Others	CRKL	e,j,p	3
CoV & Others	CSNK2A1	j,k,l,m	4
CoV & Others	CSNK2A2	i,j,k,l,m	5
CoV & Others	CSNK2B	j,m,o,p	4
CoV & Others	CTCF	j,k,l,m,p	5
CoV & Others	CTNNA1	e,p	2
CoV & Others	CTTN	e,f,i,j,m,p	6
CoV & Others	CUL2	m	1
CoV & Others	DCAF1	i,j,m,p	4
CoV & Others	DCAF7	d,j	2
CoV & Others	DCTN1	e,j,p	3
CoV & Others	DDX21	i,j,k,l,m	5
CoV & Others	DICER1	j,l,m	3
CoV & Others	DIS3	c,l,m	3
CoV & Others	DNAJB1	f,j,m,o,p	5
CoV & Others	EIF3A	l,m	2
CoV & Others	EIF3B	l	1
CoV & Others	EIF3C	l	1
CoV & Others	EIF3D	l	1
CoV & Others	EIF3E	j,l,m	3
CoV & Others	EIF3F	j,l,m	3
CoV & Others	EIF3G	l	1
CoV & Others	EIF3H	l	1
CoV & Others	EIF3I	l	1
CoV & Others	EIF3K	l	1
CoV & Others	EIF3L	l	1
CoV & Others	EIF3M	l	1
CoV & Others	ELAVL1	f,j,k,l,m,o	6
CoV & Others	ELOB	m	1
CoV & Others	ELOC	m	1
CoV & Others	EMC2	p	1
CoV & Others	ERCC3	g,i,j	3
CoV & Others	ERLIN2	e,f,m,p	4
CoV & Others	EXOSC1	c,i,j,l,m	5
CoV & Others	EXOSC3	c,i,j,l,m	5
CoV & Others	EXOSC5	c,i,j,l,m	5
CoV & Others	EXOSC8	c,i,j,l,m	5
CoV & Others	EZR	e	1
CoV & Others	FANCD2	h,j,m	3
CoV & Others	FANCG	h,j,m	3
CoV & Others	FANCI	h,j	2
CoV & Others	FAS	e,f,m,p	4
CoV & Others	FHL2	j,k,l,m,p	5
CoV & Others	FKBP1A	a	1
CoV & Others	FKBP8	j,m,o,p	4
CoV & Others	FMR1	j,m	2
CoV & Others	FXR1	j,m,n,o,p	5
CoV & Others	G3BP1	j,m,p	3
CoV & Others	G3BP2	j,l,m	3
CoV & Others	GABARAPL2	o,p	2
CoV & Others	GJA1	e	1
CoV & Others	GNA13	e	1
CoV & Others	GNB1	e,p	2
CoV & Others	GSK3A	e,j,m,p	4
CoV & Others	GSN	e	1
CoV & Others	GTF2F2	g,i,j,l	4
CoV & Others	HDAC2	i,j,m	3
CoV & Others	HECTD1	j	1
CoV & Others	HERC2	l	1
CoV & Others	HINT1	i,j,m	3
CoV & Others	HLA-E	f	1
CoV & Others	HMGA1	i,j,m	3
CoV & Others	HNRNPA3	j,m	2
CoV & Others	HNRNPM	i,j,k,l,m,p	6
CoV & Others	HSPA1L	f,m,o	3
CoV & Others	HSPA2	i,j,k,l,m	5
CoV & Others	HSPA8	j,m,n,o,p	5
CoV & Others	HSPA9	f,j,m,n,o,p	6
CoV & Others	IRAK1	e,f,j,m	4
CoV & Others	ITGB1	e,m,p	3
CoV & Others	KANK2	i,j	2
CoV & Others	KEAP1	f,j,m,n,o,p	6
CoV & Others	KPNA3	g,i,j	3
CoV & Others	KPNA5	i,j	2
CoV & Others	KPNA6	i,j,m	3
CoV & Others	LARP7	g,h,i,j,m	5
CoV & Others	LMNB1	f,j,m,o,p	5
CoV & Others	MAPK1	e,j,l,m,p	5
CoV & Others	MAPK3	e,j,l,m,o,p	6
CoV & Others	MAPRE1	e,j,m,o,p	5
CoV & Others	MARK2	e,j	2
CoV & Others	MARK3	e	1
CoV & Others	MAVS	f,j,m,n,o,p	6
CoV & Others	MDM2	j,k,l,m	4
CoV & Others	MED24	g,i,j	3
CoV & Others	MET	e,p	2
CoV & Others	MIB1	f,m	2
CoV & Others	MPHOSPH6	c,i,j,l,m	5
CoV & Others	MRE11	f,h,i,j,k,m	6
CoV & Others	MSH6	h,i,j,m	4
CoV & Others	MYO6	j	1
CoV & Others	NBR1	o,p	2
CoV & Others	NDRG1	e,j,m,o,p	5
CoV & Others	NDUFA10	r	1
CoV & Others	NFE2L2	i,j,m	3
CoV & Others	NOTCH3	m	1
CoV & Others	NPLOC4	n	1
CoV & Others	NSD2	i,j,k,l,m	5
CoV & Others	NUP133	i,j,l,m	4
CoV & Others	NUP54	l	1
CoV & Others	NUP62	j,l,m	3
CoV & Others	NUP85	i,j,l,m	4
CoV & Others	NXF1	j,l,m	3
CoV & Others	ORC4	h,j,m	3
CoV & Others	PABPN1	j,l,m	3
CoV & Others	PDIA3	m	1
CoV & Others	PDS5A	k	1
CoV & Others	PEG10	a,j,m	3
CoV & Others	PHB	j,m,o,p	4
CoV & Others	PKP2	l,m,p	3
CoV & Others	POLA2	h,j	2
CoV & Others	PPM1A	e,p	2
CoV & Others	PPP2R1A	j,m,o	3
CoV & Others	PPP2R2A	l	1
CoV & Others	PPP4R2	h,j,m	3
CoV & Others	PRIM2	h,j	2
CoV & Others	PRKACA	e,j,l,m,p	5
CoV & Others	PSEN1	e	1
CoV & Others	PSMA4	j,m	2
CoV & Others	PSMA5	j,m	2
CoV & Others	PSMC2	f,j,m	3
CoV & Others	PSMC4	f,j,m	3
CoV & Others	PSMC5	j,k,m,p	4
CoV & Others	PSMD11	j,m,n,o	4
CoV & Others	PSMD12	f,j,m,n,o	5
CoV & Others	PSMD4	f,h,j,m,n,o	6
CoV & Others	PSMD8	j,m	2
CoV & Others	PSME3	j,l,m	3
CoV & Others	PTPA	e,j,l,m,o,p	6
CoV & Others	PTPN11	e,f,j,m,p	5
CoV & Others	RAB5A	e	1
CoV & Others	RABEP1	e	1
CoV & Others	RAD23A	f,j,m,n,o,p	6
CoV & Others	RAD23B	j,m	2
CoV & Others	RAE1	j,l,m	3
CoV & Others	RANBP9	m	1
CoV & Others	RB1CC1	m,o,p	3
CoV & Others	RBX1	j,k,l,m	4
CoV & Others	RCHY1	f,m,o,p	4
CoV & Others	RHOA	e	1
CoV & Others	RIF1	h,j,m	3
CoV & Others	RIPK1	e,f,i,j,m,o,p	7
CoV & Others	RNF20	i,j,m	3
CoV & Others	RNF40	i,j,m	3
CoV & Others	RNF41	f,m,o	3
CoV & Others	RNF8	i,j,k,l,m,p	6
CoV & Others	RTCB	j,l,m	3
CoV & Others	SAE1	j,n	2
CoV & Others	SEL1L	n	1
CoV & Others	SELENOS	n	1
CoV & Others	SERPINH1	j,k,l,m	4
CoV & Others	SHC1	e,j,m,p	4
CoV & Others	SMAD2	i,j,k,l,m	5
CoV & Others	SMC6	j	1
CoV & Others	SND1	i,j,m	3
CoV & Others	SNX1	e	1
CoV & Others	SSBP1	j,m	2
CoV & Others	STAT3	j,m,o,p	4
CoV & Others	STIP1	j,m,p	3
CoV & Others	STUB1	f,j,m,n,o,p	6
CoV & Others	STX12	b	1
CoV & Others	STX4	b	1
CoV & Others	STX7	b	1
CoV & Others	TAF4	g,i,j	3
CoV & Others	TANK	f,j,m,o,p	5
CoV & Others	TBK1	f,j,m,o,p	5
CoV & Others	TELO2	h,j,m	3
CoV & Others	TFRC	e,m,p	3
CoV & Others	TGFBR1	m	1
CoV & Others	TIMELESS	j	1
CoV & Others	TIMM17B	m,p	2
CoV & Others	TMEM131	j,m,o,p	4
CoV & Others	TNFRSF10A	f,m	2
CoV & Others	TNFRSF1A	f,m,o,p	4
CoV & Others	TNIP1	f,m	2
CoV & Others	TPM1	e	1
CoV & Others	TPR	j,k,m	3
CoV & Others	TRIM3	f,m	2
CoV & Others	TRIM32	f,j,m,o,p	5
CoV & Others	TTI1	h,j,m	3
CoV & Others	UBE3A	f,j,k,m,n,o,p	7
CoV & Others	UBE3C	f,j,m,n,o,p	6
CoV & Others	UBL4A	f,m,n,o,p	5
CoV & Others	UBQLN1	m,n,o	3
CoV & Others	UBR5	j,k,l,m	4
CoV & Others	UCHL1	e,j,l,m,o,p	6
CoV & Others	UCHL5	j,m,p	3
CoV & Others	UFD1	m,n	2
CoV & Others	UPF1	j,l,m	3
CoV & Others	USP7	i,j,k,l,m,p	6
CoV & Others	USP9X	j,m,p	3
CoV & Others	VAMP2	b	1
CoV & Others	VAMP3	b	1
CoV & Others	VAMP7	b	1
CoV & Others	VASP	e,m	2
CoV & Others	VDAC1	f,j,m,o,p	5
CoV & Others	VDAC2	e,j,m,p	4
CoV & Others	XPC	j	1
CoV & Others	XPO1	i,j,l,m	4
CoV & Others	ZBTB16	j,l,m	3
CoV & Others	ZW10	j	1
CoV & Others	ZWINT	k	1
Pan_Not_CoV	ATP2A2	e,m,p	3
Pan_Not_CoV	CASP8	e,f,i,j,m,o,p	7
Pan_Not_CoV	CCT3	d,j,m,p	4
Pan_Not_CoV	DERL2	n	1
Pan_Not_CoV	DNAJA1	f,j,m,n,o,p	6
Pan_Not_CoV	EEF1A1	j,m,o	3
Pan_Not_CoV	ENO1	j,m,p	3
Pan_Not_CoV	EP300	i,j,k,l,m,p	6
Pan_Not_CoV	GAPDH	j,m,o,p	4
Pan_Not_CoV	HNRNPK	j,k,l,m,p	5
Pan_Not_CoV	ILF3	j,l,m	3
Pan_Not_CoV	NAP1L1	j,m,n,o,p	5
Pan_Not_CoV	NCL	j,k,l,m,p	5
Pan_Not_CoV	NPM1	i,j,k,l,m,p	6
Pan_Not_CoV	PCBP1	i,j,l,m	4
Pan_Not_CoV	PCNA	h,i,j,k,m	5
Pan_Not_CoV	RB1	i,j,k,l,m,p	6
Pan_Not_CoV	RBL1	i,j,m	3
Pan_Not_CoV	RPL6	m,o	2
Pan_Not_CoV	RPS7	j,m	2
Pan_Not_CoV	SCRIB	e	1
Pan_Not_CoV	SLC25A5	p	1
Pan_Not_CoV	SLC3A2	e,p	2
Pan_Not_CoV	SRSF1	i,j,l,m	4
Pan_Not_CoV	TBP	g,j	2
Pan_Not_CoV	TUBA1A	e,f,j,l,m,o,p	7
Pan_Not_CoV	TUBA1C	e,f,j,m,n,o,p	7
Pan_Not_CoV	TUBB	e,f,j,m,n,o,p	7
Pan_Not_CoV	VIM	e,f,j,k,l,m,o,p	8
Pan_Not_CoV	YWHAE	j,m,o,p	4
Pan	BAG2	j,m,o,p	4
Pan	BRD4	g,i,j,l,m	5
Pan	CANX	e,o,p	3
Pan	DDB1	i,j,m,p	4
Pan	DNAJC7	j,m	2
Pan	FAF2	f,m,n	3
Pan	HAX1	e,j,l,m,n,o,p	7
Pan	HSPA4	j,k,m,n,o,p	6
Pan	HSPA5	e,f,j,l,m,o,p	7
Pan	JAK1	e,i,j,m,p	5
Pan	KPNA1	j,k,l,m	4
Pan	KPNA2	i,j,k,l,m,p	6
Pan	PABPC1	j,m	2
Pan	PHB2	j,k,l,m	4
Pan	SEC61B	n	1
Pan	TAX1BP1	e,j,m,o,p	5
Pan	TRAF2	e,f,j,m,o,p	6
Pan	WWP1	e,f,j,m,o,p	6
Pan	WWP2	f,j,m,n,o,p	6

## Sheet: CoV-targets_in_module
Virus	Module	Number	P_value	ADJ_pvalue
MERS-CoV	46	1	0.0689432	0.0965205
MERS-CoV	95	1	0.0474314	0.0833536
MERS-CoV	428	1	0.0170126	0.039696
MERS-CoV	538	2	7.85678e-05	0.000549974
MERS-CoV	977	1	0.00854392	0.023923
MERS-CoV	1214	1	0.00854392	0.023923
SARS-CoV-1	16	1	0.12629	0.147338
SARS-CoV-1	146	1	0.0476307	0.0833536
SARS-CoV-1	346	2	0.000284437	0.00132737
SARS-CoV-2	5	2	0.142135	0.153068
SARS-CoV-2	43	5	8.82524e-06	0.000123553
SARS-CoV-2	62	1	0.22781	0.22781
SARS-CoV-2	291	1	0.0897792	0.114264
SARS-CoV-2	530	1	0.0571051	0.0888301
